# Supplementary material for: Assessing the clinical, humanistic, and economic impact of early cancer diagnosis: a systematic literature review
Source: Frontiers journal article supplement (doi:10.3389/fonc.2025.1546447), 2025-03-19
Supplement: Data_Sheet_1.pdf [file Data_Sheet_1.pdf]

## *Supplementary Material*

### 1 Search strategy

**Table 1. Search strategy for Embase (conducted on 20th May 2022)**

| No. | Query                                                                                                                                                                                                                                                                                                                                                                                                                                                                                                                                                                                                                                                                                                                               | Results |
|-----|-------------------------------------------------------------------------------------------------------------------------------------------------------------------------------------------------------------------------------------------------------------------------------------------------------------------------------------------------------------------------------------------------------------------------------------------------------------------------------------------------------------------------------------------------------------------------------------------------------------------------------------------------------------------------------------------------------------------------------------|---------|
| 1   | 'melanoma'/exp OR 'melanoma' OR 'melano*'                                                                                                                                                                                                                                                                                                                                                                                                                                                                                                                                                                                                                                                                                           | 350589  |
| 2   | 'triple negative breast cancer'/exp OR (('breast cancer' OR 'breast tumor' OR 'breast tumour' OR 'breast neoplasm' OR 'breast carcinoma') NEAR/3 ('triple negative' OR 'triple-negative'))                                                                                                                                                                                                                                                                                                                                                                                                                                                                                                                                          | 33527   |
| 3   | 'non small cell lung cancer'/exp OR 'nscle' OR 'non-small cell lung cancer' OR 'non-small-cell lung cancer' OR 'non-small':ab,ti OR 'non small':ab,ti OR 'nonsmall':ab,ti OR 'non-small cell':ab,ti OR 'non small cell':ab,ti OR 'nonsmallcell':ab,ti OR 'non-small-cell':ab,ti                                                                                                                                                                                                                                                                                                                                                                                                                                                     | 211833  |
| 4   | 'renal cell carcinoma'/exp OR (renal*:ab,ti AND (carcinoma*:ab,ti OR cancer*:ab,ti OR neoplasm*:ab,ti OR adeno*:ab,ti OR pyelocarcinoma*:ab,ti OR oncocytoma:ab,ti)) OR 'rcc':ab,ti                                                                                                                                                                                                                                                                                                                                                                                                                                                                                                                                                 | 155309  |
| 5   | 'stomach cancer'/exp OR 'gastric cancer'                                                                                                                                                                                                                                                                                                                                                                                                                                                                                                                                                                                                                                                                                            | 164199  |
| 6   | 'head and neck cancer'/exp OR 'hnscc':ab,ti OR 'hn scc':ab,ti OR 'scchn':ab,ti OR 'scc hn':ab,ti OR 'hnsc':ab,ti OR 'hnc':ab,ti                                                                                                                                                                                                                                                                                                                                                                                                                                                                                                                                                                                                     | 224160  |
| 7   | 'bladder cancer'/exp OR (((bladder OR urothelial OR 'transitional cell') NEAR/3 (cancer OR cancers OR tumor OR tumors OR tumour OR tumours OR carcinoma OR carcinomas OR neoplasm OR neoplasms)):ab,ti) OR 'transitional cell carcinoma'/exp OR 'bladder tumor'/exp OR 'urinary bladder neoplasms'                                                                                                                                                                                                                                                                                                                                                                                                                                  | 135990  |
| 8   | #1 OR #2 OR #3 OR #4 OR #5 OR #6 OR #7                                                                                                                                                                                                                                                                                                                                                                                                                                                                                                                                                                                                                                                                                              | 1170442 |
| 9   | 'early diagnosis'/exp OR (('early' OR 'earlier' OR 'earliest' OR 'earl*') NEAR/3 ('detect*' OR 'diagnos*' OR 'identif*' OR 'presentation')) OR 'early detection' OR 'early identification' OR 'early presentation' OR 'early diagnos*' OR 'early detection cancer' OR 'late diagnos*' OR 'late presentation' OR 'late detection' OR ('time' NEAR/4 ('diagnos*' OR 'detect*')) OR ('delay' NEAR/4 ('diagnos*' OR 'detect*')) OR ('interval' NEAR/4 ('diagnos*' OR 'detect*'))                                                                                                                                                                                                                                                        | 673969  |
| 10  | 'effectiveness':ab,ti OR 'mortality':ab,ti OR 'survival':ab,ti OR 'financ*':ab,ti OR 'economi*':ab,ti OR 'quality of life':ab,ti OR 'economics':ab,ti OR 'economic aspect':ab,ti OR 'cost':ab,ti OR 'health care cost':ab,ti OR 'drug cost':ab,ti OR 'hospital cost':ab,ti OR 'socioeconomics':ab,ti OR 'health economics':ab,ti OR 'pharmacoeconomics':ab,ti OR 'fee':ab,ti OR 'budget':ab,ti OR 'hospital finance':ab,ti OR 'financial management':ab,ti OR 'health care financing':ab,ti OR 'low cost':ab,ti OR 'high cost':ab,ti OR ((health*care NEXT/1 cost*):ab,ti) OR (('health care' NEXT/1 cost*):ab,ti) OR fiscal:ab,ti OR funding:ab,ti OR financial:ab,ti OR finance:ab,ti OR ((cost NEXT/1 estimate*):ab,ti) OR 'cost | 9013496 |

| No. | Query                                                                                                                                                                                                                                                                                                                                                                                                                                                                                                                                                                                                                                                                                                                                                                                                                                                                                                                                                                                                                                                                                                                                                                                                                                                                                                                                                                                                                                                                                                                 | Results |
|-----|-----------------------------------------------------------------------------------------------------------------------------------------------------------------------------------------------------------------------------------------------------------------------------------------------------------------------------------------------------------------------------------------------------------------------------------------------------------------------------------------------------------------------------------------------------------------------------------------------------------------------------------------------------------------------------------------------------------------------------------------------------------------------------------------------------------------------------------------------------------------------------------------------------------------------------------------------------------------------------------------------------------------------------------------------------------------------------------------------------------------------------------------------------------------------------------------------------------------------------------------------------------------------------------------------------------------------------------------------------------------------------------------------------------------------------------------------------------------------------------------------------------------------|---------|
|     | variable':ab,ti OR ((unit NEXT/1 cost*):ab,ti) OR economic*:ab,ti OR pharmacoeconomic*:ab,ti OR price*:ab,ti OR pricing:ab,ti OR ((health*care NEXT/1 (utilisation OR utilization)):ab,ti) OR (('health care' NEXT/1 (utilisation OR utilization)):ab,ti) OR ((resource NEXT/1 (utilisation OR utilization OR use)):ab,ti) OR ((cost* NEAR/3 (treat* OR therap*)):ab,ti) OR (((direct OR indirect) NEAR/2 cost*):ab,ti) OR 'health related quality of life':ab,ti OR 'health-related quality of life':ab,ti OR 'hrqol':ab,ti OR 'hrql':ab,ti OR 'qol':ab,ti OR 'life quality':ab,ti OR 'health-related qol':ab,ti OR 'quality adjusted life':ab,ti OR 'quality-adjust-life':ab,ti OR 'qaly':ab,ti OR 'qald':ab,ti OR 'qale':ab,ti OR 'qtime':ab,ti OR 'quality adjusted life year':ab,ti OR 'life year*':ab,ti OR 'hql':ab,ti OR 'hqol':ab,ti OR 'h qol':ab,ti OR 'hr qol':ab,ti OR (('quality' NEAR/3 'life'):ab,ti) OR 'qols':ab,ti OR 'quality of life scale':ab,ti OR (('instrument' OR 'instruments') NEAR/3 ('quality of life' OR 'qol')):ab,ti) OR 'quality of wellbeing':ab,ti OR 'response rate':ab,ti OR 'expense':ab,ti OR 'incidence':ab,ti OR 'prevalence':ab,ti OR 'burden':ab,ti OR 'efficacy':ab,ti OR 'death':ab,ti OR 'cure':ab,ti OR 'impact':ti OR 'reduce':ti OR 'benefit':ti OR 'positive':ti OR 'reduction':ti OR 'decrease':ti OR 'increase':ti OR 'improvement':ti OR 'delay':ti OR 'delayed':ti OR 'favourable':ti OR 'favorable':ti OR 'advantage':ti OR 'convenience':ti OR 'improves':ti |         |
| 11  | 'cohort study':ab,ti OR 'retrospective study':ab,ti OR 'cohort analysis':ab,ti OR 'longitudinal study':ab,ti OR 'prospective study':ab,ti OR 'observational study':ab,ti OR ((cohort NEXT/1 stud*):ab,ti) OR ((cohort NEXT/1 analy*):ab,ti) OR 'register':ab,ti OR 'registry':ab,ti OR (('database' NEAR/2 'study'):ab,ti) OR (('real' NEXT/1 'world'):ab,ti) OR (('healthcare' NEXT/1 'record'):ab,ti) OR 'pragmatic trial':ab,ti OR 'real-world clinical trial':ab,ti OR 'pragmatic clinical trial':ab,ti OR 'real-world':ab,ti OR 'real world':ab,ti OR 'database':ab,ti OR 'real-life':ab,ti OR 'real life':ab,ti OR 'database study':ab,ti                                                                                                                                                                                                                                                                                                                                                                                                                                                                                                                                                                                                                                                                                                                                                                                                                                                                       | 2058312 |
| 12  | #8 AND #9 AND #10 AND #11                                                                                                                                                                                                                                                                                                                                                                                                                                                                                                                                                                                                                                                                                                                                                                                                                                                                                                                                                                                                                                                                                                                                                                                                                                                                                                                                                                                                                                                                                             | 5802    |
| 13  | #12 AND ([conference abstract]/lim OR [conference paper]/lim OR [conference review]/lim OR [editorial]/lim OR [letter]/lim OR [note]/lim)                                                                                                                                                                                                                                                                                                                                                                                                                                                                                                                                                                                                                                                                                                                                                                                                                                                                                                                                                                                                                                                                                                                                                                                                                                                                                                                                                                             | 2641    |
| 14  | #12 AND [animals]/lim NOT ([humans]/lim AND [animals]/lim)                                                                                                                                                                                                                                                                                                                                                                                                                                                                                                                                                                                                                                                                                                                                                                                                                                                                                                                                                                                                                                                                                                                                                                                                                                                                                                                                                                                                                                                            | 20      |
| 15  | #13 OR #14                                                                                                                                                                                                                                                                                                                                                                                                                                                                                                                                                                                                                                                                                                                                                                                                                                                                                                                                                                                                                                                                                                                                                                                                                                                                                                                                                                                                                                                                                                            | 2647    |
| 16  | #12 NOT #15                                                                                                                                                                                                                                                                                                                                                                                                                                                                                                                                                                                                                                                                                                                                                                                                                                                                                                                                                                                                                                                                                                                                                                                                                                                                                                                                                                                                                                                                                                           | 3155    |
| 17  | #12 NOT #15 AND [english]/lim                                                                                                                                                                                                                                                                                                                                                                                                                                                                                                                                                                                                                                                                                                                                                                                                                                                                                                                                                                                                                                                                                                                                                                                                                                                                                                                                                                                                                                                                                         | 2956    |

**Table 2. Search strategy for Medline-In Process (conducted on 20th May 2022)**

| No. | Query                                                                                                                                                                                               | Results |
|-----|-----------------------------------------------------------------------------------------------------------------------------------------------------------------------------------------------------|---------|
| 1   | "melanoma" [MeSH Terms] OR "melano*"                                                                                                                                                                | 253659  |
| 2   | "triple negative breast neoplasms" [MeSH Terms] OR (("breast cancer" OR "breast tumor" OR "breast tumour" OR "breast neoplasm" OR "breast carcinoma") AND ("triple negative" OR "triple-negative")) | 19113   |

| No. | Query                                                                                                                                                                                                                                                                                                                                                                                                                                                                                                                                                                                                                                                                                                                                                                                                                                                                                                                                                                                                                                                                                                                                                                                                                                                                                                                                                                                                                                                                                                                                                            | Results |
|-----|------------------------------------------------------------------------------------------------------------------------------------------------------------------------------------------------------------------------------------------------------------------------------------------------------------------------------------------------------------------------------------------------------------------------------------------------------------------------------------------------------------------------------------------------------------------------------------------------------------------------------------------------------------------------------------------------------------------------------------------------------------------------------------------------------------------------------------------------------------------------------------------------------------------------------------------------------------------------------------------------------------------------------------------------------------------------------------------------------------------------------------------------------------------------------------------------------------------------------------------------------------------------------------------------------------------------------------------------------------------------------------------------------------------------------------------------------------------------------------------------------------------------------------------------------------------|---------|
| 3   | "Carcinoma, Non-Small-Cell Lung" [MeSH Terms] OR "nscle" OR "non-small cell lung cancer" OR "non-small-cell lung cancer" OR "non-small" [Title/Abstract] OR "non small" [Title/Abstract] OR "nonsmall" [Title/Abstract] OR "non-small cell" [Title/Abstract] OR "non small cell" [Title/Abstract] OR "nonsmallcell" [Title/Abstract] OR "non-small-cell" [Title/Abstract]                                                                                                                                                                                                                                                                                                                                                                                                                                                                                                                                                                                                                                                                                                                                                                                                                                                                                                                                                                                                                                                                                                                                                                                        | 95871   |
| 4   | "Carcinoma, Renal Cell" [MeSH Terms] OR (renal* [Title/Abstract] AND (carcinoma* [Title/Abstract] OR cancer* [Title/Abstract] OR neoplasm* [Title/Abstract] OR adeno* [Title/Abstract] OR pyelocarcinoma* [Title/Abstract] OR oncocytoma [Title/Abstract])) OR "rcc" [Title/Abstract]                                                                                                                                                                                                                                                                                                                                                                                                                                                                                                                                                                                                                                                                                                                                                                                                                                                                                                                                                                                                                                                                                                                                                                                                                                                                            | 100620  |
| 5   | "Stomach Neoplasms" [MeSH Terms] OR "gastric cancer"                                                                                                                                                                                                                                                                                                                                                                                                                                                                                                                                                                                                                                                                                                                                                                                                                                                                                                                                                                                                                                                                                                                                                                                                                                                                                                                                                                                                                                                                                                             | 127784  |
| 6   | "Head and Neck Neoplasms" [MeSH Terms] OR "hnsc" [Title/Abstract] OR "hn scc" [Title/Abstract] OR "scc hn" [Title/Abstract] OR "scc hn" [Title/Abstract] OR "hnsc" [Title/Abstract] OR "hnc" [Title/Abstract]                                                                                                                                                                                                                                                                                                                                                                                                                                                                                                                                                                                                                                                                                                                                                                                                                                                                                                                                                                                                                                                                                                                                                                                                                                                                                                                                                    | 343878  |
| 7   | "urinary bladder neoplasms" [MeSH Terms] OR "urinary bladder neoplasms" OR ((bladder [Title/Abstract] OR urothelial [Title/Abstract] OR "transitional cell" [Title/Abstract]) AND (cancer [Title/Abstract] OR cancers [Title/Abstract] OR tumor [Title/Abstract] OR tumors [Title/Abstract] OR tumour [Title/Abstract] OR tumours [Title/Abstract] OR carcinoma [Title/Abstract] OR carcinomas [Title/Abstract] OR neoplasm [Title/Abstract] OR neoplasms [Title/Abstract])) OR "carcinoma, transitional cell" [MeSH Terms] OR "bladder tumor"                                                                                                                                                                                                                                                                                                                                                                                                                                                                                                                                                                                                                                                                                                                                                                                                                                                                                                                                                                                                                   | 102413  |
| 8   | #1 OR #2 OR #3 OR #4 OR #5 OR #6 OR #7                                                                                                                                                                                                                                                                                                                                                                                                                                                                                                                                                                                                                                                                                                                                                                                                                                                                                                                                                                                                                                                                                                                                                                                                                                                                                                                                                                                                                                                                                                                           | 998456  |
| 9   | "early diagnosis"[MeSH Terms] OR (("early" OR "earlier" OR "earliest" OR "earl*") AND ("detect*" OR "diagnos*" OR "identif*" OR "presentation")) OR "early detection" OR "early identification" OR "early presentation" OR "early diagnos*" OR "early detection cancer" OR "late diagnos*" OR "late presentation" OR "late detection" OR ("time" AND ("diagnos*" OR "detect*")) OR ("delay" AND ("diagnos*" OR "detect*")) OR ("interval" AND ("diagnos*" OR "detect*"))                                                                                                                                                                                                                                                                                                                                                                                                                                                                                                                                                                                                                                                                                                                                                                                                                                                                                                                                                                                                                                                                                         | 2331809 |
| 10  | "effectiveness"[Title/Abstract] OR "mortality"[Title/Abstract] OR "survival" [Title/Abstract] OR "financ*"[Title/Abstract] OR "econom*"[Title/Abstract] OR "quality of life" [Title/Abstract] OR "economics" [Title/Abstract] OR "economic aspect" [Title/Abstract] OR "cost" [Title/Abstract] OR "health care cost" [Title/Abstract] OR "drug cost" [Title/Abstract] OR "hospital cost" [Title/Abstract] OR "socioeconomics" [Title/Abstract] OR "health economics" [Title/Abstract] OR "pharmacoeconomics" [Title/Abstract] OR "fee" [Title/Abstract] OR "budget" [Title/Abstract] OR "hospital finance" [Title/Abstract] OR "financial management" [Title/Abstract] OR "health care financing" [Title/Abstract] OR "low cost" [Title/Abstract] OR "high cost" [Title/Abstract] OR ("health care"[Title/Abstract] AND cost*[Title/Abstract]) OR ("healthcare"[Title/Abstract] AND cost*[Title/Abstract]) OR ("health-care"[Title/Abstract] AND cost*[Title/Abstract]) OR ("health care"[Title/Abstract] AND cost*[Title/Abstract]) OR fiscal[Title/Abstract] OR funding[Title/Abstract] OR financial[Title/Abstract] OR finance[Title/Abstract] OR (cost[Title/Abstract] AND estimate*[Title/Abstract]) OR "cost variable" [Title/Abstract] OR (unit[Title/Abstract] AND cost*[Title/Abstract]) OR economic*[Title/Abstract] OR pharmacoeconomic*[Title/Abstract] OR price*[Title/Abstract] OR pricing[Title/Abstract] OR (healthcare[Title/Abstract] AND (utilization[Title/Abstract] OR utilization[Title/Abstract])) OR ("health care" [Title/Abstract] AND | 6661909 |

| No. | Query                                                                                                                                                                                                                                                                                                                                                                                                                                                                                                                                                                                                                                                                                                                                                                                                                                                                                                                                                                                                                                                                                                                                                                                                                                                                                                                                                                                                                                                                                                                                                                                                                                                                                                                                                                                                                                                                                                            | Results |
|-----|------------------------------------------------------------------------------------------------------------------------------------------------------------------------------------------------------------------------------------------------------------------------------------------------------------------------------------------------------------------------------------------------------------------------------------------------------------------------------------------------------------------------------------------------------------------------------------------------------------------------------------------------------------------------------------------------------------------------------------------------------------------------------------------------------------------------------------------------------------------------------------------------------------------------------------------------------------------------------------------------------------------------------------------------------------------------------------------------------------------------------------------------------------------------------------------------------------------------------------------------------------------------------------------------------------------------------------------------------------------------------------------------------------------------------------------------------------------------------------------------------------------------------------------------------------------------------------------------------------------------------------------------------------------------------------------------------------------------------------------------------------------------------------------------------------------------------------------------------------------------------------------------------------------|---------|
|     | (utilisation[Title/Abstract] OR utilization[Title/Abstract])) OR (resource[Title/Abstract] AND (utilisation[Title/Abstract] OR utilization[Title/Abstract] OR use[Title/Abstract])) OR (cost*[Title/Abstract] AND (treat*[Title/Abstract] OR therap*[Title/Abstract])) OR ((direct[Title/Abstract] OR indirect[Title/Abstract]) AND cost*[Title/Abstract]) OR "health related quality of life" [Title/Abstract] OR "health-related quality of life" [Title/Abstract] OR "hrqol" [Title/Abstract] OR "hrql"[Title/Abstract] OR "qol" [Title/Abstract] OR "life quality"[Title/Abstract] OR "health-related qol"[Title/Abstract] OR "quality adjusted life"[Title/Abstract] OR "quality-adjust-life"[Title/Abstract] OR "qaly"[Title/Abstract] OR "qald"[Title/Abstract] OR "qale"[Title/Abstract] OR "qtime"[Title/Abstract] OR "quality adjusted life year"[Title/Abstract] OR "life year*" [Title/Abstract] OR "hql"[Title/Abstract] OR "hqol"[Title/Abstract] OR "h qol"[Title/Abstract] OR "hr qol"[Title/Abstract] OR ("quality"[Title/Abstract] AND "life"[Title/Abstract]) OR "qols"[Title/Abstract] OR "quality of life scale"[Title/Abstract] OR (("instrument"[Title/Abstract] OR "instruments"[Title/Abstract]) AND ("quality of life"[Title/Abstract] OR "qol"[Title/Abstract])) OR "quality of wellbeing"[Title/Abstract] OR "response rate"[Title/Abstract] OR "expense"[Title/Abstract] OR "incidence"[Title/Abstract] OR "prevalence"[Title/Abstract] OR "burden"[Title/Abstract] OR "efficacy"[Title/Abstract] OR "death"[Title/Abstract] OR "cure"[Title/Abstract] OR "impact"[Title] OR "reduce"[Title] OR "benefit"[Title] OR "positive"[Title] OR "reduction"[Title] OR "decrease"[Title] OR "increase"[Title] OR "improvement"[Title] OR "delay"[Title] OR "delayed"[Title] OR "favourable"[Title] OR "favorable"[Title] OR "advantage"[Title] OR "convenience"[Title] OR "improves"[Title] |         |
| 11  | "cohort study"[Title/Abstract] OR "retrospective study"[Title/Abstract] OR "cohort analysis"[Title/Abstract] OR "longitudinal study"[Title/Abstract] OR "prospective study"[Title/Abstract] OR "observational study"[Title/Abstract] OR (cohort[Title/Abstract] AND stud*[Title/Abstract]) OR (cohort[Title/Abstract] AND analy*[Title/Abstract]) OR "register"[Title/Abstract] OR "registry"[Title/Abstract] OR ("database"[Title/Abstract] AND "study"[Title/Abstract]) OR ("real" [Title/Abstract] AND "world" [Title/Abstract]) OR ("healthcare"[Title/Abstract] AND "record"[Title/Abstract]) OR "pragmatic trial" [Title/Abstract] OR "real-world clinical trial"[Title/Abstract] OR "pragmatic clinical trial" [Title/Abstract] OR "real-world"[Title/Abstract] OR "real world" [Title/Abstract] OR "database"[Title/Abstract] OR "real-life"[Title/Abstract] OR "real life"[Title/Abstract] OR "database study"[Title/Abstract]                                                                                                                                                                                                                                                                                                                                                                                                                                                                                                                                                                                                                                                                                                                                                                                                                                                                                                                                                                          | 1669677 |
| 12  | #8 AND #9 AND #10 AND #11                                                                                                                                                                                                                                                                                                                                                                                                                                                                                                                                                                                                                                                                                                                                                                                                                                                                                                                                                                                                                                                                                                                                                                                                                                                                                                                                                                                                                                                                                                                                                                                                                                                                                                                                                                                                                                                                                        | 14436   |
| 13  | #12 AND 'conference review' [Publication Type] OR editorial [Publication Type] OR letter [Publication Type] OR review [Publication Type]                                                                                                                                                                                                                                                                                                                                                                                                                                                                                                                                                                                                                                                                                                                                                                                                                                                                                                                                                                                                                                                                                                                                                                                                                                                                                                                                                                                                                                                                                                                                                                                                                                                                                                                                                                         | 4794734 |
| 14  | #12 NOT #13                                                                                                                                                                                                                                                                                                                                                                                                                                                                                                                                                                                                                                                                                                                                                                                                                                                                                                                                                                                                                                                                                                                                                                                                                                                                                                                                                                                                                                                                                                                                                                                                                                                                                                                                                                                                                                                                                                      | 13848   |
| 15  | #14 AND (inprocess[ <i>sb</i> ] OR pubstatusaheadofprint)                                                                                                                                                                                                                                                                                                                                                                                                                                                                                                                                                                                                                                                                                                                                                                                                                                                                                                                                                                                                                                                                                                                                                                                                                                                                                                                                                                                                                                                                                                                                                                                                                                                                                                                                                                                                                                                        | 203     |

## 2 PICOTS eligibility criteria for study inclusion

| PICOTS               | Inclusion Criteria                                                                                                                                                                                                                                                                                                                                                                                                                                                                                                                                                                                                                                                                                                                                                                                                                                                                       |
|----------------------|------------------------------------------------------------------------------------------------------------------------------------------------------------------------------------------------------------------------------------------------------------------------------------------------------------------------------------------------------------------------------------------------------------------------------------------------------------------------------------------------------------------------------------------------------------------------------------------------------------------------------------------------------------------------------------------------------------------------------------------------------------------------------------------------------------------------------------------------------------------------------------------|
| <b>Population(s)</b> | <ul style="list-style-type: none"> <li>• Adult (<math>\geq 18</math> years) patients of any gender or race, with one of the following cancers at the time of diagnosis:               <ul style="list-style-type: none"> <li>○ Melanoma</li> <li>○ TNBC</li> <li>○ NSCLC (Squamous and Non-squamous)</li> <li>○ RCC</li> <li>○ Gastric cancer</li> <li>○ HNC</li> <li>○ Bladder cancer (Muscle invasive and non-muscle invasive)</li> </ul> </li> <li>• Patients were included, regardless of presenting with early/ late-stage, low/ high-risk (i.e., eligible [or not] for chemotherapy or presenting with comorbidities) disease, or with/ without surgical resection</li> </ul>                                                                                                                                                                                                      |
| <b>Interventions</b> | No restriction                                                                                                                                                                                                                                                                                                                                                                                                                                                                                                                                                                                                                                                                                                                                                                                                                                                                           |
| <b>Comparisons</b>   | No restriction                                                                                                                                                                                                                                                                                                                                                                                                                                                                                                                                                                                                                                                                                                                                                                                                                                                                           |
| <b>Outcomes</b>      | <p><b>Survival outcomes by stage at diagnosis</b></p> <ul style="list-style-type: none"> <li>▪ Overall survival</li> <li>▪ Mortality, premature/ avoidable cancer-related deaths</li> </ul> <ul style="list-style-type: none"> <li>• <b>Humanistic burden by stage at diagnosis</b> <ul style="list-style-type: none"> <li>▪ General patient-reported outcomes (e.g., 0-100 scales/questionnaires)</li> <li>▪ Physical, functional, and mobile well-being (e.g., 0-100 scales/questionnaires and qualitative reports)</li> <li>▪ Mental, emotional, and social well-being (either qualitative or quantitative),</li> <li>▪ Fear of cancer progression and/or death, psychological quality of life, qualitative lived experience associated with cancer (either qualitative or quantitative)</li> </ul> </li> <li>• <b>Financial impact associated with stage at diagnosis</b></li> </ul> |

|                         |                                                                                                                                                                                                                                                                                                                                                                                                                                                                                                                                                                                                                         |
|-------------------------|-------------------------------------------------------------------------------------------------------------------------------------------------------------------------------------------------------------------------------------------------------------------------------------------------------------------------------------------------------------------------------------------------------------------------------------------------------------------------------------------------------------------------------------------------------------------------------------------------------------------------|
|                         | <ul style="list-style-type: none"> <li>▪ Direct medical costs for early vs late-stage cancer, including visit fees, tests, treatments, consultations or follow-ups for outpatients, and hospitalization costs, serious illnesses or medical issues that require substantial monitoring, management of complications, treatment administration, length of stay for inpatients</li> <li>▪ Direct non-medical costs, including travel, accommodation, and meals</li> <li>▪ Indirect costs for patients and caregivers (e.g., productivity loss costs including lost wages, absenteeism, early retirement, etc.)</li> </ul> |
| <b>Time</b>             | No timeframe restriction                                                                                                                                                                                                                                                                                                                                                                                                                                                                                                                                                                                                |
| <b>Study design</b>     | <p>Study designs included were:</p> <ul style="list-style-type: none"> <li>• <b>Observational studies, including:</b> <ul style="list-style-type: none"> <li>▪ Cohort studies (prospective and retrospective)</li> <li>▪ Case control studies (prospective and retrospective)</li> <li>▪ Cross sectional studies</li> <li>▪ Longitudinal studies</li> </ul> </li> </ul> <p>Reviews (systematic or general reviews) were retrieved for the identification of additional relevant primary studies that may have been missed through the electronic searches.</p>                                                          |
| <b>Country</b>          | Global                                                                                                                                                                                                                                                                                                                                                                                                                                                                                                                                                                                                                  |
| <b>Other (Language)</b> | Studies with full texts published in English language only will be included                                                                                                                                                                                                                                                                                                                                                                                                                                                                                                                                             |

Abbreviations: HNC: Head and neck cancer; NSCLC: Non-small cell lung cancer; PICOTS: Population, intervention, comparisons, outcomes, time, study design; RCC: Renal cell carcinoma; TNBC: Triple negative breast cancer

### 3 Classification and definition of early and late stages of cancer used among the studies included in the SLR that reported their definition of early stages vs. late stages

| Study                 | Tumor type          | Stage classification system  | Definition of stage                                                                                                                                                                                     |
|-----------------------|---------------------|------------------------------|---------------------------------------------------------------------------------------------------------------------------------------------------------------------------------------------------------|
| <b>Bladder cancer</b> |                     |                              |                                                                                                                                                                                                         |
| Fisher 2018<br>(1)    | Bladder cancer      | NR                           | Stage IV bladder cancer diagnosis defined as T4b, node-positive, or distant metastatic disease.                                                                                                         |
| <b>HNC</b>            |                     |                              |                                                                                                                                                                                                         |
| Ho 2019<br>(2)        | Oral cavity cancer  | NR                           | Early stage defined as "Stage 0-I".                                                                                                                                                                     |
| Singh 2021<br>(3)     | Oral cancer         | AJCC                         | Stage was defined by the AJCC classification. Patients were stratified according to their stage of disease at diagnosis into early (Stage I, II) and advanced (Stage III, IV) stages as per the latest. |
| <b>Melanoma</b>       |                     |                              |                                                                                                                                                                                                         |
| Song 2015<br>(4)      | Metastatic melanoma | AJCC 6 <sup>th</sup> edition | Patients diagnosed with unresectable regionally metastatic refer to stage IIIB/C and distantly metastatic refers to stage IV).                                                                          |
| Toscano 2020<br>(5)   | Melanoma            | TNM                          | Patients diagnosed early or non-metastatic stage defined with a stage I or II.                                                                                                                          |
| Wilson 2019<br>(6)    | Metastatic melanoma | AJCC 7 <sup>th</sup> edition | Metastatic disease refers to the time at which the patient was diagnosed with metastatic melanoma, stage IV disease.                                                                                    |
| <b>NSCLC</b>          |                     |                              |                                                                                                                                                                                                         |
| Berglund 2012<br>(7)  | NSCLC               | NR                           | Early stage defined as "Stage IA-IIIB" Late stage defined as "IIIA-IV".                                                                                                                                 |
| Ehrenstein 2022       | NSCLC               | NR                           | Early stage refers to the stage "I-IIIA"                                                                                                                                                                |

| Study                 | Tumor type | Stage classification system                                                                                                                     | Definition of stage                                                                                                                                                                                            |
|-----------------------|------------|-------------------------------------------------------------------------------------------------------------------------------------------------|----------------------------------------------------------------------------------------------------------------------------------------------------------------------------------------------------------------|
| (8)                   |            |                                                                                                                                                 |                                                                                                                                                                                                                |
| Flores 2021<br>(9)    | NSCLC      | NR                                                                                                                                              | SEER historic staging was used to impute stage for these patients. Those with historic stage values of localized were coded as stage I/II, regional was coded as stage III, and distant was coded as stage IV. |
| Monteiro 2022<br>(10) | NSCLC      | AJCC 7 <sup>th</sup> edition                                                                                                                    | Early-stage NSCLC defined as clinical stage I-IIIa.                                                                                                                                                            |
| Snee 2021<br>(11)     | NSCLC      | UICC 6 <sup>th</sup> edition (up to 31 December 2009), UICC 7 <sup>th</sup> edition from 1 January 2010 and the 8th edition from 1 January 2017 | Early stage refers to stage "I-IIIa", Advanced stage refers to stage "IIIB-IV"                                                                                                                                 |
| <b>TNBC</b>           |            |                                                                                                                                                 |                                                                                                                                                                                                                |
| Schwartz 2018<br>(12) | TNBC       | AJCC                                                                                                                                            | Patients with stage III and IV defined as advanced stage                                                                                                                                                       |

Abbreviations: AJCC: American Joint Committee; HNC: Head and neck cancer; NR: Not reported; NR: Not reported; NSCLC: Non-small cell lung cancer; SEER: Surveillance, Epidemiology, and End Results Program; TNBC: Triple negative breast cancer; TNM: Tumor (T), nodes (N), and metastases (M);



#### 4 Summary of studies included in the clinical review (n=52)

| Study name             | Tumor types    | Objective                                                                                                                                                                                 | Study design                                | Publication type    | Country | Data source                                                                                                              | Study setting               | Time frame              | Duration of follow up |
|------------------------|----------------|-------------------------------------------------------------------------------------------------------------------------------------------------------------------------------------------|---------------------------------------------|---------------------|---------|--------------------------------------------------------------------------------------------------------------------------|-----------------------------|-------------------------|-----------------------|
| <b>Bladder cancer</b>  |                |                                                                                                                                                                                           |                                             |                     |         |                                                                                                                          |                             |                         |                       |
| Amiri 2020 (13)        | Bladder cancer | Estimate the survival rate of patients with bladder cancer according to the Cox proportional hazards model based on some key relevant variables.                                          | Retrospective population-based cohort study | Article             | Iran    | Cancer registry at Provincial Health Department, Cancer Registration Center and Provincial Mortality Registration Center | Provincial population based | 2013 to 2018            | NR                    |
| Aragon-Ching 2021 (14) | Bladder cancer | Evaluate trends between UC vs. nUC histology for upper tract cancers and compare the demographics, disease characteristics, treatment, incidence of stage and survival according to NCDB. | Retrospective observational study           | Conference abstract | USA     | NCDB                                                                                                                     | Nationwide population based | 2004 – 2017             | NR                    |
| Davies 2020 (15)       | Bladder cancer | Establish a standing cohort of patients with metastatic bladder cancer.                                                                                                                   | Retrospective observational analysis        | Conference abstract | England | NCRAS                                                                                                                    | Nationwide population based | January 2016- June 2017 | NR                    |

| Study name             | Tumor types                     | Objective                                                                                                                                                                                                                                             | Study design                                      | Publication type    | Country     | Data source                           | Study setting                  | Time frame                                                                           | Duration of follow up                         |
|------------------------|---------------------------------|-------------------------------------------------------------------------------------------------------------------------------------------------------------------------------------------------------------------------------------------------------|---------------------------------------------------|---------------------|-------------|---------------------------------------|--------------------------------|--------------------------------------------------------------------------------------|-----------------------------------------------|
| Fisher 2018 (1)        | Bladder cancer                  | Understand how patients with stage IV bladder cancer are treated and to add to the limited data that examine effectiveness outcomes associated with that treatment.                                                                                   | Retrospective observational study                 | Article             | USA         | Vector Oncology Data Warehouse        | Multi-center                   | 1 January 2008- 1 June 2015                                                          | NR                                            |
| Omland 2021 (16)       | Metastatic urinary tract cancer | Describe treatment patterns and survival outcomes in mUTC patients treated in the real-world clinical setting.                                                                                                                                        | Nationwide, retrospective, population-based study | Article             | Denmark     | EHRs from Danish oncology departments | Multi-center                   | December 2017 and mid 2018 for one Center each; mid 2019 for remaining four Centers. | Median follow-up: 11.6 months                 |
| Sorup 2021 (17)        | Urothelial Cancer               | Characterize treatment patterns, survival outcomes, and HRU in patients with stage IV UC in Denmark.                                                                                                                                                  | Population-based, retrospective cohort study      | Conference abstract | Denmark     | Danish Cancer Registry                | Nationwide population based    | January 1, 2013- December 31, 2017                                                   | Median follow-up: 10.2 months (IQR, 3.6-19.4) |
| <b>Gastric cancer</b>  |                                 |                                                                                                                                                                                                                                                       |                                                   |                     |             |                                       |                                |                                                                                      |                                               |
| Dijksterhuis 2022 (18) | Gastric cancer                  | Explore use of palliative treatment and overall survival of gastric or GEJ cancer patients and compare overall survival of the patients with interval metastases with gastric or GEJ cancer patients who had distant metastases at initial diagnosis. | Retrospective cohort study                        | Article in Press    | Netherlands | Netherlands Cancer Registry (NCR)     | National wide population based | 2010 to 2018                                                                         | NR                                            |

| Study name           | Tumor types           | Objective                                                                                                                                                   | Study design                             | Publication type    | Country | Data source                            | Study setting                  | Time frame   | Duration of follow up                                           |
|----------------------|-----------------------|-------------------------------------------------------------------------------------------------------------------------------------------------------------|------------------------------------------|---------------------|---------|----------------------------------------|--------------------------------|--------------|-----------------------------------------------------------------|
| Qiu 2018 (19)        | Gastric cancer        | Analyze metastatic pattern in gastric cancer to help physicians to design imagine examination, especially in making determinations regarding interventions. | Retrospective analysis                   | Article             | USA     | SEER                                   | National wide population based | 2010 to 2014 | NR                                                              |
| <b>HNC</b>           |                       |                                                                                                                                                             |                                          |                     |         |                                        |                                |              |                                                                 |
| Amarillo 2021 (20)   | Head and neck cancer  | Identify an impact of delay in the first treatment in OS in head and neck cancer patients.                                                                  | Retrospective observational cohort study | Conference abstract | Uruguay | Institutional database of the hospital | Single - Center                | 2005-2015    | Median: 6.9 years                                               |
| Ho 2019 (2)          | Oral cavity cancer    | Evaluate the effectiveness of the TOMS program in stage-shift among oral cavity cancer patients.                                                            | Retrospective cohort study               | Article             | Taiwan  | TCR, TOMS and TDR                      | National wide population based | 2008 to 2015 | (From the TDR) or to December 31, 2016 (end of follow-up time). |
| Hochfelder 2020 (21) | Hypopharyngeal cancer | Examine the association between primary treatment and overall survival among patients with locoregionally advanced hypopharyngeal cancer.                   | Retrospective observational study        | Conference abstract | USA     | NCDB                                   | Nationwide population based    | 2005-2015    | NR                                                              |

| Study name         | Tumor types       | Objective                                                                                                                                                | Study design                           | Publication type    | Country | Data source                            | Study setting               | Time frame               | Duration of follow up                                               |
|--------------------|-------------------|----------------------------------------------------------------------------------------------------------------------------------------------------------|----------------------------------------|---------------------|---------|----------------------------------------|-----------------------------|--------------------------|---------------------------------------------------------------------|
| Neto 2021 (22)     | Oropharynx cancer | To assess the prognostic performance of eighth and seventh AJCC staging edition in patients with p16 positive oropharynx cancer.                         | Institutional database of the hospital | Conference abstract | USA     | Institutional database of the hospital | Nationwide population based | March 2015-December 2018 | Median: 34.7 months (2.3-169.74)                                    |
| Sargeran 2008 (23) | Oral cancer       | Analyze 1- to 5-year survival rates for patients with lip cancer in relation to age, sex, stage of the tumor, histological type, and treatment.          | Retrospective cohort study             | Article             | Iran    | Iran Ministry of Health                | Nationwide population based | 1996 to 2002             | The patients were followed from the date of diagnosis to late 2005. |
| Sargeran 2009 (24) | Lip cancer        | Analyze 1- to 5-year survival rates for patients with lip cancer in relation to age, sex, stage of the tumor, histological type, and treatment modality. | Retrospective cohort study             | Article             | Iran    | Iran Ministry of Health                | Nationwide population based | 1996 to 2003             | Median: 57 (range 0-112 months); Mean (SD): 56.4 (28) months        |
| <b>Melanoma</b>    |                   |                                                                                                                                                          |                                        |                     |         |                                        |                             |                          |                                                                     |
| Ngo 2020 (25)      | Melanoma          | Evaluate survival and recurrence patterns of stage II and III cutaneous melanoma.                                                                        | Retrospective cohort analysis          | Conference abstract | NR      | NR                                     | NR                          | 2000-2012                | NR                                                                  |
| Ramond 2021 (26)   | Melanoma          | Assess availability of data from PHE to study malignant melanoma survival in England.                                                                    | Retrospective observational study      | Conference abstract | England | Public Health England (PHE)            | Nationwide population based | 1995-2016                | NR                                                                  |

| Study name              | Tumor types           | Objective                                                                                                                                               | Study design                              | Publication type    | Country | Data source                 | Study setting               | Time frame                        | Duration of follow up                                          |
|-------------------------|-----------------------|---------------------------------------------------------------------------------------------------------------------------------------------------------|-------------------------------------------|---------------------|---------|-----------------------------|-----------------------------|-----------------------------------|----------------------------------------------------------------|
| Song 2015 (4)           | Metastatic melanoma   | Describe survival rates among patients diagnosed with unresectable stage IIIB/C or stage IV melanoma.                                                   | Retrospective observational study         | Article             | USA     | SEER database               | Nationwide population based | 2004 to 2009                      | Mean (SD): 11.3 (138) months                                   |
| Tjokrowidjaja 2021 (27) | Melanoma              | Assess overall survival and cancer-specific survival for AJCC-7 and AJCC-8.                                                                             | Retrospective study                       | Article             | USA     | SEER database               | Nationwide population based | 2010-2015                         | NR                                                             |
| Wilson 2019 (6)         | Melanoma              | Examine the impact of initial stage of melanoma diagnosis, BRAF status of primary melanoma, and receiving adjuvant therapy on post metastatic survival. | Prospective observational study           | Article             | USA     | IMCG database               | Single center               | August 2002 to December 2015      | Post metastasis, median: 25 (range: 0.5 to 167.8) months       |
| Winge-Main 2020 (28)    | Melanoma              | Investigate the characteristics and outcomes of Norwegian cutaneous melanoma patients with stage IIB-IV.                                                | Retrospective cohort study                | Conference abstract | Norway  | Cancer Registry of Norway   | Nationwide population based | January 2008-December 2018        | NR                                                             |
| <b>NSCLC</b>            |                       |                                                                                                                                                         |                                           |                     |         |                             |                             |                                   |                                                                |
| Abrão 2021 (29)         | NSCLC, adenocarcinoma | Examine long-term survival and possible predictors in all patients with stage I and II lung cancer adenocarcinoma.                                      | Hospital-based retrospective cohort study | Article             | Brazil  | Institutional/city database | Single center               | January 2000 to December 31, 2019 | Mean: 45.2 (SD 41.3 months); Median: 32.8 (Range 1-223 months) |

| Study name                                              | Tumor types | Objective                                                                                                                                                                            | Study design                                | Publication type    | Country | Data source                             | Study setting               | Time frame    | Duration of follow up        |
|---------------------------------------------------------|-------------|--------------------------------------------------------------------------------------------------------------------------------------------------------------------------------------|---------------------------------------------|---------------------|---------|-----------------------------------------|-----------------------------|---------------|------------------------------|
| Abrão 2022 (30)                                         | NSCLC       | Evaluate overall survival and prognostic factors in Stage I NSCLC patients treated only with radiotherapy and surgery in a 19-year follow-up cohort.                                 | Retrospective hospital-based cohort study   | Article in Press    | Brazil  | Sao Paulo's Oncocentro, FOSP            | Multi-center                | 2000 and 2015 | Mean: 51.2 (SD: 41.4) months |
| Azzouqa 2019 (31)                                       | NSCLC       | Determine if there is an association between time to treatment initiation and survival in patients with NSCLC.                                                                       | Retrospective cohort study                  | Conference abstract | USA     | Mayo Clinic Cancer Center registry      | Multi-center                | 2000 to 2016  | NR                           |
| Berglund 2012 (7)                                       | NSCLC       | Examine possible social variations in lung cancer survival and assess if any such gradients can be attributed to social differences in comorbidity, stage at diagnosis or treatment. | Retrospective observational study           | Article             | UK      | Thames Cancer Registry                  | Nationwide population based | 2006-2008     | NR                           |
| Cerqueira 2022<br><i>Linked to: Cerquiera 2022 (32)</i> | NSCLC       | Evaluate NSCLC stage III/IV patients' journey in the Brazilian supplementary healthcare system.                                                                                      | Population based retrospective cohort study | Conference abstract | Brazil  | Hospital-based cancer registry database | Private hospital based      | 2016-2018     | NR                           |
| Ehrenstein 2022 (8)                                     | NSCLC       | Describe EGFR testing, patient characteristics, and overall survival among patients with early-stage NSCLC.                                                                          | Retrospective observational study           | Article             | Denmark | Danish Lung Cancer Registry             | Nationwide population based | 2013 to 2018  | Until 10 September 2019      |

| Study name                                           | Tumor types | Objective                                                                                                                                                                                 | Study design                              | Publication type    | Country         | Data source                                                                        | Study setting                  | Time frame                                                              | Duration of follow up                                           |
|------------------------------------------------------|-------------|-------------------------------------------------------------------------------------------------------------------------------------------------------------------------------------------|-------------------------------------------|---------------------|-----------------|------------------------------------------------------------------------------------|--------------------------------|-------------------------------------------------------------------------|-----------------------------------------------------------------|
| Ekman 2019 (33)                                      | NSCLC       | Report initial treatment and OS for patients with NSCLC prior to the availability of immunotherapies in Sweden.                                                                           | Retrospective observational study         | Conference abstract | Sweden          | Institutional databases of University Hospitals                                    | Multi-center                   | 2012 to 2015 (follow-up to December 2016)                               | Followed up to Dec 2016                                         |
| Flores 2021 (9)                                      | NSCLC       | Investigate association of stage shift with population mortality among patients with NSCLC.                                                                                               | Retrospective cohort study                | Article             | USA             | SEER                                                                               | National wide population based | 2006 to 2016                                                            | Median: 61 Months [IQR 21-95]                                   |
| Greystoke 2021 (34)                                  | NSCLC       | Assess patient characteristics, treatment patterns, and OS in patients with NSCLC.                                                                                                        | Retrospective observational study         | Conference abstract | England         | Public Health England's CAS                                                        | Nationwide population based    | 2013-2018                                                               | NR                                                              |
| Jazieh 2021<br><i>Linked to:</i><br>Jazieh 2020 (35) | NSCLC       | Determine the treatment patterns and their associated clinical outcomes in patients with stage III NSCLC, as defined by the AJCC criteria (seventh edition) in the pre-PACIFIC study era. | Retrospective noninterventio<br>nal study | Article             | 19<br>Countries | Medical records from hospitals (from Asia, Middle East, Africa, and Latin America) | Multi-center, Multinational    | January 2013-<br>December 2017                                          | At least 9 months of documented follow-up since index diagnosis |
| Kalilani 2022 (36)                                   | NSCLC       | Provide recent estimates of survival in patients with advanced NSCLC in the USA.                                                                                                          | Retrospective observational study         | Conference abstract | USA             | SEER database and Flatiron Health database                                         | Nationwide population based    | 1). SEER database: 2010–2016<br>2). Flatiron Health database: 2017–2020 | NR                                                              |

| Study name           | Tumor types | Objective                                                                                                                                                  | Study design                         | Publication type    | Country                                                                  | Data source                     | Study setting                  | Time frame                 | Duration of follow up                                                                                   |
|----------------------|-------------|------------------------------------------------------------------------------------------------------------------------------------------------------------|--------------------------------------|---------------------|--------------------------------------------------------------------------|---------------------------------|--------------------------------|----------------------------|---------------------------------------------------------------------------------------------------------|
| Klarenbeek 2022 (37) | NSCLC       | Examine factors associated between time-to-treatment and overall survival in a large nationwide retrospective cohort.                                      | Large nationwide retrospective study | Article in Press    | Netherlands                                                              | The Netherlands Cancer Registry | National wide population based | 2014 to 2019               | NR                                                                                                      |
| Komiya 2020 (38)     | NSCLC       | Study the role of T0 status in OS for unresectable stage III non-small cell lung cancer.                                                                   | Retrospective study                  | Conference abstract | USA                                                                      | National Cancer Database        | Nationwide population based    | 2004-2016                  | NR                                                                                                      |
| Luciano 2020 (39)    | NSCLC       | Assess overall survival, TTT, follow-up time, and treatment pathways in metastatic NSCLC patients treated with programmed cell death protein 1 inhibitors. | Retrospective observational analysis | Conference abstract | USA                                                                      | A USA based EMR network         | Nationwide population based    | NR                         | Advanced diagnosis: 21.87 months [IQR 11.94-38.97] From inhibitor initiation: 8.71 months (3.06, 17.26) |
| Martin 2022 (40)     | NSCLC       | Report on treatment patterns and their associated clinical outcomes in patients with stage III NSCLC in the LATAM subset from the pre-immuno-oncology era. | Retrospective study                  | Article             | Argentina, Chile, Colombia, Dominican Republic, Mexico, Peru and Uruguay | LATAM subset from KINDLE Study  | Multi-center                   | January 2013-December 2017 | NR                                                                                                      |



| Study name         | Tumor types | Objective                                                                                                                                                                                        | Study design                                     | Publication type    | Country | Data source                            | Study setting                      | Time frame                     | Duration of follow up                      |
|--------------------|-------------|--------------------------------------------------------------------------------------------------------------------------------------------------------------------------------------------------|--------------------------------------------------|---------------------|---------|----------------------------------------|------------------------------------|--------------------------------|--------------------------------------------|
| Monteiro 2022 (10) | NSCLC       | Evaluate impact of microvascular invasion on the 5-year OS of patients with resected NSCLC treated at the INCA.                                                                                  | Retrospective, observational cohort study        | Article             | Brazil  | Institutional database of the hospital | Single center                      | January 2010 and December 2016 | Median: 83 months                          |
| Potter 2022 (41)   | NSCLC       | Determine the effect of the introduction of low-dose CT screening in 2013 on lung cancer stage shift, survival, and disparities in the stage of lung cancer diagnosed in the USA.                | Retrospective analysis, quasi-experimental study | Article             | USA     | The National Cancer Database           | National wide population based     | 2010 and 2018                  | NR                                         |
| Rittberg 2021 (42) | NSCLC       | Evaluate real world, population-based outcomes for Stage IV NSCLC to assess impact of changing therapies on referral, treatment patterns and OS, which may help explain ongoing stigma/nihilism. | Retrospective cohort study                       | Conference abstract | Canada  | NR                                     | Real world, population-based study | 2006-2015                      | NR                                         |
| Snee 2021 (11)     | NSCLC       | Report characteristics, treatment and overall survival trends, by stage and pathology, of patients diagnosed with NSCLC.                                                                         | Retrospective cohort study                       | Article             | UK      | Leeds Teaching Hospital NHS Trust      | Single center                      | January 2007-August 2017       | Date of death or end of study (April 2018) |

| Study name                  | Tumor types          | Objective                                                                                                                                                  | Study design                             | Publication type    | Country     | Data source                                                  | Study setting               | Time frame                 | Duration of follow up            |
|-----------------------------|----------------------|------------------------------------------------------------------------------------------------------------------------------------------------------------|------------------------------------------|---------------------|-------------|--------------------------------------------------------------|-----------------------------|----------------------------|----------------------------------|
| Soares 2021 (43)            | NSCLC                | Evaluate treatment patterns and survival for patients with stage I–IIIA NSCLC.                                                                             | Retrospective observational cohort study | Article             | Portugal    | IPO-Porto oncology hospital                                  | Single center               | January 2012–December 2016 | Till June 2017                   |
| Suipyte 2019 (44)           | NSCLC                | Evaluate patient with stage IV NSCLC in a real life setting and its impact on OS over the past 10 years.                                                   | Retrospective cohort study               | Conference abstract | Switzerland | Institutional database of the hospitals                      | Multi-center                | 2005-2007 and 2015-2016    | NR                               |
| Vachani 2021 (45)           | NSCLC                | Quantify the association of stage at diagnosis with OS and MHE in the first year after diagnosis in patients with NSCLC.                                   | Retrospective observational study        | Conference abstract | USA         | SEER Database                                                | Nationwide population based | 2006-2015                  | 12 months                        |
| Van Dao 2022 (46)           | NSCLC                | Characterize treatment patterns and clinical outcomes of patients with stage III NSCLC.                                                                    | Retrospective observational study        | Article             | Vietnam     | 2 hospitals in Vietnam (one each in North and South Vietnam) | Multi-center                | 2013-2017                  | Mean (SD): 17.52 (13.81) months. |
| <b>Renal cell carcinoma</b> |                      |                                                                                                                                                            |                                          |                     |             |                                                              |                             |                            |                                  |
| Haas 2022 (47)              | Renal cell carcinoma | Evaluate recurrence rate and overall survival outcomes by disease stage and incremental impact of time to recurrence on overall survival in localized RCC. | Retrospective observational study        | Conference abstract | USA         | SEER-Medicare database                                       | Nationwide population based | 2007-2016                  | Median: 23 months                |

| Study name       | Tumor types          | Objective                                                                                                                                                                    | Study design                            | Publication type    | Country | Data source                                                                        | Study setting                  | Time frame                    | Duration of follow up         |
|------------------|----------------------|------------------------------------------------------------------------------------------------------------------------------------------------------------------------------|-----------------------------------------|---------------------|---------|------------------------------------------------------------------------------------|--------------------------------|-------------------------------|-------------------------------|
| Haas 2022 (48)   | Renal cell carcinoma | Evaluate disease free survival and overall survival patterns and risk of overall survival among patients with non-metastatic RCC in the USA.                                 | Retrospective study                     | Conference abstract | USA     | ConcertAI Oncology Dataset                                                         | Nationwide population based    | 2012-2015                     | Median: 49.5 months           |
| Li 2021 (49)     | ccRCC                | Explore baseline characteristics, pathological and survival outcomes of Asian-American patients with ccRCC and make comparisons with White patients.                         | Retrospective population-based analysis | Article             | USA     | SEER database                                                                      | Nationwide population based    | 2010-2015                     | Median: 35 [IQR 19-55] months |
| <b>TNBC</b>      |                      |                                                                                                                                                                              |                                         |                     |         |                                                                                    |                                |                               |                               |
| Aly 2019 (50)    | TNBC                 | Estimate overall survival, treatment patterns and economic burden of elderly metastatic TNBC patients.                                                                       | Retrospective, observational study      | Article             | USA     | SEER-Medicare database                                                             | National wide population based | 2004 – 2011                   | Mean: 14.1 months             |
| Gogate 2022 (51) | TNBC                 | Describe clinical parameters by receipt of systemic therapy and to assess OS, PFS after NAT and adjuvant therapy in women with early HR+/HER2- or TNBC using RWE in the USA. | Retrospective observational study       | Conference abstract | USA     | Flatiron Health nationwide electronic health record-derived de-identified database | Nationwide real-world setting  | 1 January 2011 to 31 May 2018 | NR                            |

| Study name         | Tumor types | Objective                                                                                                                                                                                                                         | Study design           | Publication type    | Country | Data source                  | Study setting                  | Time frame                    | Duration of follow up                                                                         |
|--------------------|-------------|-----------------------------------------------------------------------------------------------------------------------------------------------------------------------------------------------------------------------------------|------------------------|---------------------|---------|------------------------------|--------------------------------|-------------------------------|-----------------------------------------------------------------------------------------------|
| Lehrberg 2021 (52) | TNBC        | Evaluate survival rate and phenotype of patients with early stage breast cancer with negative SLN biopsy.                                                                                                                         | Retrospective analysis | Article             | USA     | The Henry Ford Health System | Single-center                  | October 1998 to February 2017 | Mean (range): White American women, 95 (0, 218) months<br>African American women, 86 (3, 218) |
| Schwartz 2018 (12) | TNBC        | Identify and characterize elderly patients with advanced TNBC with respect to baseline demographics and comorbidities, treatment, including chemotherapy regimens, by specific type of therapy, survival patterns, HRU and costs. | Retrospective analysis | Article             | USA     | SEER                         | National wide population based | January 2007 to January 2011  | Through to December 31, 2013                                                                  |
| Sieluk 2020 (53)   | TNBC        | Provide insights into patient characteristics, as well as clinical and economic outcomes for elderly patients with early stage TNBC, treated from 2010-2016 in the USA.                                                           | Retrospective          | Conference abstract | USA     | SEER-Medicare database       | Multi-center                   | 2010 – 2015                   | Median (range): 20.2 months (2.4-84.1)                                                        |

| Study name        | Tumor types | Objective                                                                                                                                                                                                                                                                | Study design        | Publication type | Country | Data source            | Study setting | Time frame                      | Duration of follow up               |
|-------------------|-------------|--------------------------------------------------------------------------------------------------------------------------------------------------------------------------------------------------------------------------------------------------------------------------|---------------------|------------------|---------|------------------------|---------------|---------------------------------|-------------------------------------|
| Yousefi 2017 (54) | TNBC        | Analyze the clinical, pathological profile and survival, recurrence of TNBC patients and find the factors effective in recurrence in breast cancer patients and compared them with patients without recurrence, and prognostic factors effective in the patients' death. | Retrospective study | Article          | Iran    | Institutional database | Single center | September 2002 to December 2014 | Median: 41 months (range 4.2 – 208) |

Abbreviations: 1R: One regimen; 2R: Two regimens; 3R+: Three or more regimens; 5-FU: Fluorouracil; AI: American Indian; AJCC: American Joint Committee on Cancer; AL: Acral lentiginous; AN: Alaska native; ASCC: Adenosquamous cell carcinoma; BC: Bronchioloalveolar carcinoma; CA: Cerebrovascular accident; CaEto: Carboplatin and etoposide; CaG: Carboplatin and gemcitabine; CAS: Cancer analysis system; CCI: Charlson Comorbidity Index; CHF: Congestive heart failure; COPD: Chronic pulmonary obstructive disease; CPD: Chronic pulmonary disease; EC: Epidermoid carcinoma; ECOG PS: Eastern Cooperative Oncology Group performance score; EGFR: Estimated glomerular filtration rate; GC: Gemcitabine and cisplatin; Gem: Gemcitabine; HER2: Human epidermal growth factor receptor 2; HTN: Hypertension; ICD: International Classification of Diseases; IDC: Invasive ductal carcinoma; IDM: Infiltrating ductal mixed; ILC: Invasive lobular carcinoma; ILM: Infiltrating lobular mixed; IQR: Interquartile range; LA: Locally advanced; LCC: Large cell carcinoma; MA: Mucinous adenocarcinoma; MI: Myocardial infarction; MVAC: Methotrexate, vinblastine, doxorubicin and cisplatin; NA: Not available; NOS: Not otherwise specified; NPCR: National Program of Cancer Registries; NR: Not reported; NSCLC: Non-small cell lung cancer; NSQ: Non-squamous; RCC: Renal cell carcinoma; RD: Renal disease; SACT: Systemic anticancer therapy; SCC: Squamous cell carcinoma; SCNCC: Small-cell neuroendocrine carcinoma; SD: Standard deviation; SEER: Surveillance, Epidemiology, and End Results Program; SQ: Squamous; SRCC: Signet ring cell carcinoma; SS: Superficial spreading; TNBC: Triple negative breast cancer; TNM: Tumor (T), nodes (N), and metastases (M); UC: Urothelial cancer; UICC: Union for International Cancer Control

## Population characteristics

| Study name             | Patient population                         | Stage at diagnosis | Sample size (N) | Age (Year)                                        | Gender, n (%)                           | Race/ethnicity                                                                                                   | Stage distribution                                                                                                   | ECOG PS | Tumor histology                                            | Comorbidities                                                                                             |
|------------------------|--------------------------------------------|--------------------|-----------------|---------------------------------------------------|-----------------------------------------|------------------------------------------------------------------------------------------------------------------|----------------------------------------------------------------------------------------------------------------------|---------|------------------------------------------------------------|-----------------------------------------------------------------------------------------------------------|
| <b>Bladder cancer</b>  |                                            |                    |                 |                                                   |                                         |                                                                                                                  |                                                                                                                      |         |                                                            |                                                                                                           |
| Amiri 2020 (13)        | All stages                                 | All stages         | 321             | NR                                                | Male: 264 (82.20)<br>Female: 57 (0.177) | NR                                                                                                               | Poorly differentiated: 217 (67.4)<br>Well differentiated: 104 (32.4)                                                 | NR      | Adenocarcinoma: 10 (3.1)<br>SCC: 7 (2.1)<br>UC: 304 (94.7) | Yes: 116 (34.1)<br>No: 205 (63.8)                                                                         |
| Aragon-Ching 2021 (14) | Urothelial carcinoma                       | All stages         | 29743           | Median: 73                                        | NR                                      | White: 92%<br>Caucasian: 4%                                                                                      | Stage IV: NR (8.1)                                                                                                   | NR      | NR                                                         | NR                                                                                                        |
|                        | Non-urothelial carcinoma                   | All stages         | 561             | Median: 72                                        | NR                                      | White: 91%<br>Caucasian: 6%<br>African American: 6%                                                              | Stage IV: NR (29)                                                                                                    | NR      | NR                                                         | NR                                                                                                        |
| Davies 2020 (15)       | Patients with metastatic urothelial cancer | Metastatic         | 2,543           | Mean: 74 (SD: 11.1)                               | Male: 64%<br>Female: 36%                | NR                                                                                                               | NR                                                                                                                   | NR      | Transitional cell morphology: NR (73)                      | Hypertension: 24<br>Type-2 diabetes: 9                                                                    |
| Fisher 2018 (1)        | Patients with stage IV bladder cancer      | Stage IV           | 508             | Mean: 69.7(SD: 11.1)<br>Median: 71(range : 35-92) | Male: 382 (75.2)<br>Female: 126 (24.8)  | White:402 (79.1)<br>Black: 78 (15.4)<br>Asian:1 (0.2)<br>Others: Latino: 3 (0.6)<br>Other/undocumented: 24 (4.7) | ICD: Stage I: 38 (7.5); II: 63 (12.4); III: 47 (9.3); IV: 158 (31.1);<br>Unknown: 23 (45)<br>Undocumented: 179(35.2) | NR      | NR                                                         | Diabetes: 119 (23.4)<br>RD: 84 (16.5)<br>COPD: 63 (12.4)<br>MI: 41 (8.1)<br>CHF: 26 (5.1)<br>CA: 24 (4.7) |

| Study name       | Patient population                                                                      | Stage at diagnosis | Sample size (N) | Age (Year)                                       | Gender, n (%)                          | Race/ethnicity                                                                                                  | Stage distribution                                                                                           | ECOG PS                                                                                                              | Tumor histology                                                                                                        | Comorbidities                                                                                       |
|------------------|-----------------------------------------------------------------------------------------|--------------------|-----------------|--------------------------------------------------|----------------------------------------|-----------------------------------------------------------------------------------------------------------------|--------------------------------------------------------------------------------------------------------------|----------------------------------------------------------------------------------------------------------------------|------------------------------------------------------------------------------------------------------------------------|-----------------------------------------------------------------------------------------------------|
|                  | Patients with stage IV bladder cancer (<65 Years)                                       | Stage IV           | 145             | Mean: 55.7(SD: 6.7)<br>Median: 57(range : 35-64) | Male: 109 (75.2)<br>Female: 36 (24.8)  | White:107 (73.8) Black: 27 (18.6)<br>Asian:1 (0.7)<br>Others:<br>Latino: 2 (0.6)<br>Other/undocumented: 8 (5.5) | ICD: Stage I: 10 (6.9); II: 13 (9); III: 16 (11); IV: 56 (38.6);<br>Unknown: 8 (5.5)<br>Undocumented: 42(29) | NR                                                                                                                   | NR                                                                                                                     | Diabetes: 27 (18.6)<br>RD: 13 (9.0)<br>COPD: 10 (6.9)<br>MI: 6 (4.1)<br>CHF: 3 (2.1)<br>CA: 1 (0.7) |
| Omland 2021 (16) | All patients with metastatic Urinary tract Cancer who initiated first-line chemotherapy | Overall            | 952             | Median: 69 [IQR: 63-75]                          | Male: 686 (72.1)<br>Female: 266 (27.9) | NR                                                                                                              | NR                                                                                                           | Status 0: 341 (35.8)<br>Status 1: 321 (33.7)<br>Status 2: 135 (14.2)<br>Status 3: 5 (0.5) Status unknown: 150 (15.8) | UC: 879 (92.3%) SCC: 27 (2.8%)<br>Adenocarcinoma: 10 (1.1%)<br>SCNCC: 29 (3.0%) Other: 5 (0.5%)<br>Unknown: 2 (0.2%)   | NR                                                                                                  |
|                  | Patients initiated GC as first-line treatment                                           | Overall            | 440             | Median: 67 [IQR: 61-71]                          | Male: 339 (77)<br>Female: 101 (23)     | NR                                                                                                              | NR                                                                                                           | Status 0: 205 (46.6)<br>Status 1: 129 (29.3)<br>Status 2: 34 (7.7) Status 3: 1 (0.2)<br>Status unknown: 71 (16.1)    | UC: 414 (94.1%); SCC: 14 (3.2%)<br>Adenocarcinoma: 7 (1.6%)<br>SCNCC: 0 (0.0%)<br>Other: 4 (0.9%)<br>Unknown: 1 (0.2%) | NR                                                                                                  |

| Study name | Patient population                                         | Stage at diagnosis | Sample size (N) | Age (Year)              | Gender, n (%)                         | Race/ethnicity | Stage distribution | ECOG PS                                                                                                         | Tumor histology                                                                                    | Comorbidities |
|------------|------------------------------------------------------------|--------------------|-----------------|-------------------------|---------------------------------------|----------------|--------------------|-----------------------------------------------------------------------------------------------------------------|----------------------------------------------------------------------------------------------------|---------------|
|            | Patients initiated GC split course as first-line treatment | Overall            | 84              | Median: 68 [IQR: 63-73] | Male: 64 (76.2)<br>Female: 20 (23.8)  | NR             | NR                 | Status 0: 35 (41.7)<br>Status 1: 34 (40.5)<br>Status 2: 4 (4.8)<br>Status 3: 0 (0)<br>ECOG unknown: 11 (13.1)   | UC: 79 (94.0%)<br>SCC: 4 (4.8%)<br>Adenocarcinoma: 1 (1.2%)<br>SCNCC: 0<br>Other: 0<br>Unknown: 0  | NR            |
|            | Patients initiated CaG as first-line treatment             | Overall            | 201             | Median: 72 [IQR: 66-76] | Male: 131 (65.2)<br>Female: 70 (34.8) | NR             | NR                 | Status 0: 33 (21)<br>Status 1: 48 (30.6)<br>Status 2: 47 (29.9)<br>Status 3: 3 (1.9)<br>ECOG unknown: 26 (16.6) | UC: 194 (96.5%)<br>SCC: 5 (2.5%)<br>Adenocarcinoma: 2 (1.0%)<br>SCNCC: 0<br>Other: 0<br>Unknown: 0 | NR            |
|            | Patients initiated Gem as first-line treatment             | Overall            | 157             | Median: 76 [IQR: 70-78] | Male: 104 (66.2)<br>Female: 53 (33.8) | NR             | NR                 | Status 0: 33 (21)<br>Status 1: 48 (30.6)<br>Status 2: 47 (29.9)<br>Status 3: 3 (1.9)<br>ECOG unknown: 26 (16.6) | UC: 154 (98.0%)<br>SCC: 2 (1.3%)<br>Adenocarcinoma: 0<br>SCNCC: 0<br>Other: 1 (0.6%)<br>Unknown: 0 | NR            |
|            | Patients initiated CaEto as first-line treatment           | Overall            | 35              | Median: 69 [IQR: 63-76] | Male: 25 (71.4)<br>Female: 10 (28.6)  | NR             | NR                 | Status 0: 20 (57.1)<br>Status 1: 7 (20)<br>Status 2: 5 (14.3)<br>Status 3: 0 (0)<br>Unknown: 3 (8.6)            | UC: 8 (22.9%)<br>SCC: 0<br>Adenocarcinoma: 0<br>SCNCC: 26 (74.3%)<br>Other: 0<br>Unknown: 1 (2.9%) | NR            |



| Study name             | Patient population                                                                                                                                                                                        | Stage at diagnosis | Sample size (N) | Age (Year)                    | Gender, n (%)                          | Race/ethnicity | Stage distribution                                                                                          | ECOG PS                                                                                              | Tumor histology                                                                                                        | Comorbidities                                                                                          |
|------------------------|-----------------------------------------------------------------------------------------------------------------------------------------------------------------------------------------------------------|--------------------|-----------------|-------------------------------|----------------------------------------|----------------|-------------------------------------------------------------------------------------------------------------|------------------------------------------------------------------------------------------------------|------------------------------------------------------------------------------------------------------------------------|--------------------------------------------------------------------------------------------------------|
|                        | Patients initiated other treatments (MVAC, vinflunine/gemcitabine, cisplatin/gemcitabine/lapatinib, paclitaxel/carboplatin, paclitaxel/gemcitabine, and docetaxel/cisplatin/5-FU) as first-line treatment | Overall            | 35              | Median: 63 [IQR: 59-71]       | Male: 23 (65.7)<br>Female: 12 (34.3)   | NR             | NR                                                                                                          | Status 0: 20 (57.1)<br>Status 1: 7 (20)<br>Status 2: 5 (14.3)<br>Status 3: 0 (0)<br>Unknown: 3 (8.6) | UC: 30 (85.7%)<br>SCC: 2 (5.7%)<br>Adenocarcinoma: 0<br>SCNCC: 3 (8.6%)<br>Other: 0<br>Unknown: 0                      | NR                                                                                                     |
| Sorup 2021 (17)        | Patients with incident stage IV urothelial cancer                                                                                                                                                         | Stage IV           | 620             | Median: 72.2 [IQR: 65.6-78.2] | Male: 394 (63.5)<br>Female: 226 (36.5) | NR             | Stage IV: 620 (100)                                                                                         | NR                                                                                                   | NR                                                                                                                     | NR                                                                                                     |
| <b>Gastric cancer</b>  |                                                                                                                                                                                                           |                    |                 |                               |                                        |                |                                                                                                             |                                                                                                      |                                                                                                                        |                                                                                                        |
| Dijksterhuis 2022 (18) | Gastric adenocarcinoma diagnosed with distant interval metastases                                                                                                                                         | Overall            | 164             | Median: 66 [IQR: 58-72]       | Male: 98 (60)<br>Female: 66 (40)       | NR             | TNM 7 <sup>th</sup> and 8 <sup>th</sup> :<br>Stage I-II: 50 (30)<br>Stage III: 74 (45)<br>Stage Iva: 15 (9) | Status 0/1: 114 (69)<br>Status 2: 8 (5)<br>Status unknown: 42 (26)                                   | Intestinal: 46 (28)<br>Diffuse: 75 (46)<br>Mixed: 7 (4)<br>Indeterminate: 4 (2)<br>Signet ring cell histology: 32 (20) | No. of comorbidities 0: 93 (57)<br>No. of comorbidities 1: 45 (27)<br>No. of comorbidities >2: 17 (10) |

| Study name    | Patient population                | Stage at diagnosis | Sample size (N) | Age (Year)              | Gender, n (%)                               | Race/ethnicity                                                                | Stage distribution                                                                          | ECOG PS | Tumor histology                                                              | Comorbidities                          |
|---------------|-----------------------------------|--------------------|-----------------|-------------------------|---------------------------------------------|-------------------------------------------------------------------------------|---------------------------------------------------------------------------------------------|---------|------------------------------------------------------------------------------|----------------------------------------|
|               |                                   |                    |                 |                         |                                             |                                                                               |                                                                                             |         |                                                                              | No. Of comorbidities<br>Unknown: 9 (5) |
| Qiu 2018 (19) | Overall                           | Overall            | 19022           | Median: 66              | Male: 12208 (64.18)<br>Female: 6814 (35.82) | NR                                                                            | AJCC 7 <sup>th</sup> : Stage I: NR (21.63); II: NR (14.92); III: NR (22.48); IV: NR (40.96) | NR      | NR                                                                           | NR                                     |
|               | Patients with no liver metastases | Overall            | NR              | Mean: 65.74 (SD: 14.15) | Male: 9703 (80.84)<br>Female: 5753 (86.24)  | White: 10743 (82.21)<br>Asian: 2413 (87.68)<br>African American: 1909 (80.18) | NR                                                                                          | NR      | Adenocarcinoma: 11459 (79.74)<br>Mucinous: 327 (86.28)<br>SRCC: 3670 (93.53) | NR                                     |
|               | Patients with liver metastases    | Overall            | NR              | Mean: 65.66 (SD: 13.20) | Male: 2300 (19.16)<br>Female: 918 (13.76)   | White: 2325 (17.79)<br>Asian: 339 (12.32)<br>African American: 472 (19.82)    | NR                                                                                          | NR      | Adenocarcinoma: 2912 (20.26)<br>Mucinous: 52 (13.72)<br>SRCC: 254 (6.47)     | NR                                     |
|               | Patients with no lung metastases  | Overall            | NR              | Mean: 65.82 (SD: 13.95) | Male: 11148 (93.57)<br>Female: 6276 (94.58) | White: 12128 (93.56)<br>Asian: 2623 (95.76)<br>African American: 2234 (93.91) | NR                                                                                          | NR      | Adenocarcinoma: 13322 (93.5)<br>Mucinous: 350 (93.09)<br>SRCC: 3752 (95.57)  | NR                                     |
|               | Patients with lung metastases     | Overall            | NR              | Mean: 64.21 (SD: 14.52) | Male: 766 (6.43)<br>Female: 360 (5.42)      | White: 835 (6.44)<br>Asian: 116 (4.24)<br>African American: 145 (6.09)        | NR                                                                                          | NR      | Adenocarcinoma: 926 (6.5)<br>Mucinous: 26 (6.91)<br>SRCC: 174 (4.43)         | NR                                     |

| Study name         | Patient population                | Stage at diagnosis | Sample size (N) | Age (Year)              | Gender, n (%)                               | Race/ethnicity                                                                | Stage distribution | ECOG PS | Tumor histology                                                              | Comorbidities |
|--------------------|-----------------------------------|--------------------|-----------------|-------------------------|---------------------------------------------|-------------------------------------------------------------------------------|--------------------|---------|------------------------------------------------------------------------------|---------------|
|                    | Patients with no bone metastases  | Overall            | NR              | Mean: 65.99 (SD: 13.93) | Male: 11302 (94.59)<br>Female: 6322 (95.18) | White: 12300 (94.53)<br>Asian: 2614 (95.47)<br>African American: 2265 (95.45) | NR                 | NR      | Adenocarcinoma: 13624 (95.47)<br>Mucinous: 362 (94.52)<br>SRCC: 3638 (92.41) | NR            |
|                    | Patients with bone metastases     | Overall            | NR              | Mean: 60.68 (SD: 13.99) | Male: 646 (5.41)<br>Female: 320 (4.82)      | White: 712 (5.47)<br>Asian: 124 (4.53)<br>African American: 108 (4.55)        | NR                 | NR      | Adenocarcinoma: 646 (4.53)<br>Mucinous: 21 (5.48)<br>SRCC: 299 (7.59)        | NR            |
|                    | Patients with no brain metastases | Overall            | NR              | Mean: 65.75 (SD: 13.98) | Male: 11816 (99.05)<br>Female: 6590 (99.43) | White: 12868 (99.02)<br>Asian: 2717 (99.49)<br>African American: 2356 (99.58) | NR                 | NR      | Adenocarcinoma: 14134 (99.18)<br>Mucinous: 376 (99.47)<br>SRCC: 3896 (99.19) | NR            |
|                    | Patients with brain metastases    | Overall            | NR              | Mean: 61.34 (SD: 13.64) | Male: 113 (0.95)<br>Female: 38 (0.57)       | White: 127 (0.98)<br>Asian: 14 (0.51)<br>African American: 10 (0.42)          | NR                 | NR      | Adenocarcinoma: 117 (0.82)<br>Mucinous: 2 (0.53)<br>SRCC: 32 (0.81)          | NR            |
| <b>HNC</b>         |                                   |                    |                 |                         |                                             |                                                                               |                    |         |                                                                              |               |
| Amarillo 2021 (20) | Patients who received treatment   | All stages         | 377             | NR                      | NR                                          | NR                                                                            | NR                 | NR      | NR                                                                           | NR            |

| Study name  | Patient population | Stage at diagnosis           | Sample size (N) | Age (Year) | Gender, n (%)                            | Race/ethnicity | Stage distribution                                                                                                       | ECOG PS | Tumor histology | Comorbidities |
|-------------|--------------------|------------------------------|-----------------|------------|------------------------------------------|----------------|--------------------------------------------------------------------------------------------------------------------------|---------|-----------------|---------------|
| Ho 2019 (2) | NR                 | Overall                      | 36,139          | NR         | NR                                       | NR             | ICD-C-O (C00-C06): Stage I: 10383 (30.2); II: 6627 (19.3); III: 3954 (11.5); IV: 13134 (38.2); Unknown: Other: 1766 (NR) | NR      | NR              | NR            |
|             | NR                 | Stage 0                      | 275             | Median: 55 | Male: 239 (86.9)<br>Female: 36 (13.1)    | NR             | NR                                                                                                                       | NR      | NR              | NR            |
|             | NR                 | Stage I                      | 10,383          | Median: 53 | Male: 9158 (88.2)<br>Female: 1225 (11.8) | NR             | NR                                                                                                                       | NR      | NR              | NR            |
|             | NR                 | Stage II                     | 6,627           | Median: 54 | Male: 6037 (91.1)<br>Female: 590 (8.9)   | NR             | NR                                                                                                                       | NR      | NR              | NR            |
|             | NR                 | Stage III                    | 3,954           | Median: 53 | Male: 3630 (91.8)<br>Female: 324 (8.2)   | NR             | NR                                                                                                                       | NR      | NR              | NR            |
|             | NR                 | Stage IV                     | 13,134          | Median: 53 | Male: 12083 (92)<br>Female: 1051 (8)     | NR             | NR                                                                                                                       | NR      | NR              | NR            |
|             | NR                 | Other (no stage information) | 1,766           | Median: 53 | Male: 1543 (87.4)<br>Female: 223 (12.6)  | NR             | NR                                                                                                                       | NR      | NR              | NR            |

| Study name           | Patient population                               | Stage at diagnosis | Sample size (N) | Age (Year)                                         | Gender, n (%)                              | Race/ethnicity                              | Stage distribution                                                                                            | ECOG PS | Tumor histology | Comorbidities |
|----------------------|--------------------------------------------------|--------------------|-----------------|----------------------------------------------------|--------------------------------------------|---------------------------------------------|---------------------------------------------------------------------------------------------------------------|---------|-----------------|---------------|
| Hochfelder 2020 (21) | Stage III or IV, M0, hypopharyngeal SCC patients | Stage III or IV    | 5,272           | NR                                                 | NR                                         | NR                                          | NR                                                                                                            | NR      | NR              | NR            |
|                      | Native Hawaiian/Pacific Islander                 | Overall            | 469             | Mean: 57.8 (SD: 12.3)                              | Male: 340 (72.5)<br>Female: 129 (27.5)     | Native/Hawaiian/Pacific Islander: 469 (100) | NR                                                                                                            | NR      | NR              | NR            |
|                      | Non-Hispanic White                               | Overall            | 71,110          | Mean: 62.2 (SD: 12.1)                              | Male: 54274 (76.3)<br>Female: 16838 (23.7) | Non-Hispanic White: 71110 (100)             | NR                                                                                                            | NR      | NR              | NR            |
| Neto 2021 (22)       | AJCC 7 <sup>th</sup> edition                     | All stages         | 463             | NR                                                 | NR                                         | NR                                          | AJCC 7 <sup>th</sup> : Stage I: 17 (NR); II: 29 (NR); III: 54 (NR); IVA: 319 (NR); IVB: 19 (NR); IVC: 25 (NR) | NR      | NR              | NR            |
|                      | AJCC 8 <sup>th</sup> edition                     | All stages         | 463             | NR                                                 | NR                                         | NR                                          | AJCC 8 <sup>th</sup> : Stage I: 279 (NR); II: 94 (NR); III: 65 (NR); IV: 25 (NR)                              | NR      | NR              | NR            |
| Sargeran 2009 (24)   | Overall                                          | Overall            | 82              | Mean: 58.6 (SD: 15.2)<br>Median: 62 (range: 27-85) | Male: 70 (85)<br>Female: 12 (15)           | NR                                          | Stage I: 35 (43); II: 17 (21); III: 11 (13); IV: 9 (11); Unknown: 10 (12)                                     | NR      | NR              | NR            |

| Study name         | Patient population                  | Stage at diagnosis | Sample size (N) | Age (Year)                  | Gender, n (%)                         | Race/ethnicity                                                                                         | Stage distribution                                                                                                                  | ECOG PS | Tumor histology | Comorbidities |
|--------------------|-------------------------------------|--------------------|-----------------|-----------------------------|---------------------------------------|--------------------------------------------------------------------------------------------------------|-------------------------------------------------------------------------------------------------------------------------------------|---------|-----------------|---------------|
| Sargeran 2008 (23) | Overall                             | Overall            | 82              | Mean: 61 (SD: 15)           | Male: 257 (55)<br>Female: 213 (45)    | NR                                                                                                     | ICD 10: Stage of tumor I: 92 (20) II: 73 (16) III: 70 (15) IV: 167 (35)                                                             | NR      | NR              | NR            |
| <b>Melanoma</b>    |                                     |                    |                 |                             |                                       |                                                                                                        |                                                                                                                                     |         |                 |               |
| Ngo 2020 (25)      | Stage II and III cutaneous melanoma | Stage II and III   | 169             | Median: 63.2 (range: 14-93) | Male: 106 (62.7)<br>Female: 63 (37.3) | NR                                                                                                     | AJCC 8 <sup>th</sup> : Stage II: 81 (47.9), Stage III: 88 (52.1)                                                                    | NR      | NR              | NR            |
|                    | Stage II cutaneous melanoma         | Stage II           | 81              | Median: 69.3                | NR                                    | NR                                                                                                     | NR                                                                                                                                  | NR      | NR              | NR            |
|                    | Stage III cutaneous melanoma        | Stage III          | 88              | Median: 58.1                | NR                                    | NR                                                                                                     | NR                                                                                                                                  | NR      | NR              | NR            |
| Ramond 2021 (26)   | Overall patients with melanoma      | All stages         | 184,864         | NR                          | NR                                    | NR                                                                                                     | NR                                                                                                                                  | NR      | NR              | NR            |
| Song 2015 (4)      | Overall stage at diagnosis          | Overall            | 1682            | Mean: 64 (SD: 15.3)         | Male: 68%<br>Female: 32%              | White: 91.7%<br>Black: 1.7%<br>Asian: 1.4%<br>Hispanic: 4.8%<br>Others: 0.3% (AI/ AN)<br>Unknown: 0.2% | AJCC 6 <sup>th</sup> : Stage IIIB/C: 74 (4.40)<br>Stage IV: Stage M1A: 212 (126)<br>Stage M1B: 292 (17.4)<br>Stage M1C: 1104 (65.6) | NR      | NR              | NR            |
|                    | Stage IIIB/C at diagnosis           | Stage at diagnosis | 74              | Mean: 63.1 (SD: 18.9)       | Male: 66.2%<br>Female: 33.8%          | White: 96%<br>Black: 1.4%<br>Asian: 0%<br>Hispanic: 2.7%<br>Others: 0% (AI/ AN): 0<br>Unknown: 0%      | NR                                                                                                                                  | NR      | NR              | NR            |

| Study name              | Patient population        | Stage at diagnosis | Sample size (N) | Age (Year)            | Gender, n (%)                          | Race/ethnicity                                                                                       | Stage distribution | ECOG PS | Tumor histology | Comorbidities |
|-------------------------|---------------------------|--------------------|-----------------|-----------------------|----------------------------------------|------------------------------------------------------------------------------------------------------|--------------------|---------|-----------------|---------------|
|                         | Stage IV M1A at diagnosis | Stage at diagnosis | 212             | Mean: 64.8 (SD: 16.3) | Male: 63.7%<br>Female: 36.3%           | White: 93.4%<br>Black: 1.9%<br>Asian: 1.9%<br>Hispanic: 2.4%<br>Others: 0% (AI/ AN)<br>Unknown: 0.5% | NR                 | NR      | NR              | NR            |
|                         | Stage IV M1B at diagnosis | Stage at diagnosis | 292             | Mean: 67.8 (SD: 13.3) | Male: 67.8%<br>Female: 32.2%           | White: 93.5%<br>Black: 2.4%<br>Asian: 0%<br>Hispanic: 4.1%<br>Others: NR                             | NR                 | NR      | NR              | NR            |
|                         | Stage IV M1C at diagnosis | Stage at diagnosis | 1104            | Mean: 62.9 (SD: 15.2) | Male: 69%<br>Female: 31%               | White: 90.6%<br>Black: 1.5%<br>Asian: 1.7%<br>Hispanic: 5.5%<br>AI/ AN: 0.5%<br>Unknown: 0.3%        | NR                 | NR      | NR              | NR            |
| Tjokrowidjaja 2021 (27) | Melanoma overall          | Overall            | 59,989          | NR                    | Male: 33353 (55)<br>Female: 26636 (45) | NR                                                                                                   | NR                 | NR      | NR              | NR            |

| Study name | Patient population | Stage at diagnosis | Sample size (N) | Age (Year) | Gender, n (%) | Race/ethnicity | Stage distribution                                                                                                                                                                                                                                | ECOG PS | Tumor histology | Comorbidities |
|------------|--------------------|--------------------|-----------------|------------|---------------|----------------|---------------------------------------------------------------------------------------------------------------------------------------------------------------------------------------------------------------------------------------------------|---------|-----------------|---------------|
|            | Melanoma overall   | Overall            | NR              | NR         | NR            | NR             | AJCC 7 <sup>th</sup> pathological stage groups:<br>IA: 26,944 (45);<br>IB: 18,507 (31);<br>IIA: 4117 (7);<br>IIB: 2829 (5)<br>IIC: 1441 (2)<br>Stage III: IIIA:<br>1160 (2) IIB:<br>1463 (2) IIC:<br>925 (2); IV:<br>2603 (4)                     | NR      | NR              | NR            |
|            | Melanoma overall   | Overall            | NR              | NR         | NR            | NR             | AJCC 8 <sup>th</sup> pathological stage groups:<br>IA: 38,344 (64)<br>IB: 7099 (12)<br>Stage II: IIA:<br>4116 (7) IIB:<br>2833 (5) IIC:<br>1445 (2) Stage<br>III: IIIA: 855<br>(1) IIB: 909 (1)<br>IIC: 1730 (3)<br>IIID: 54 (1); IV:<br>2604 (4) | NR      | NR              | NR            |



| Study name      | Patient population | Stage at diagnosis | Sample size (N) | Age (Year)                | Gender, n (%)                       | Race/ethnicity | Stage distribution                                                                                                                                                                   | ECOG PS                   | Tumor histology                                                | Comorbidities |
|-----------------|--------------------|--------------------|-----------------|---------------------------|-------------------------------------|----------------|--------------------------------------------------------------------------------------------------------------------------------------------------------------------------------------|---------------------------|----------------------------------------------------------------|---------------|
|                 | Melanoma overall   | Overall            | NR              | NR                        | NR                                  | NR             | AJCC 7 <sup>th</sup> clinical stage groups: AJCC Stage I: IA: 26,944 (45) IB: 18,429 (30) Stage II: IIA: 4117 (7) IIB: 2829 (5) IIC: 1441(2) Stage III: 4048 (7) Stage IV: 2603 (4)  | NR                        | NR                                                             | NR            |
|                 | Melanoma overall   | Overall            | NR              | NR                        | NR                                  | NR             | AJCC 8 <sup>th</sup> clinical stage groups: AJCC Stage I: IA: 32,143 (53) IB: 13,225 (22) Stage II: IIA: 4118 (7) IIB: 2835 (5) IIC: 1446 (2) Stage III: 4040 (7) Stage IV: 2604 (4) | NR                        | NR                                                             | NR            |
| Wilson 2019 (6) | Overall            | Overall            | 304             | Median: 60 (range: 18–93) | Male: 202 (66.4) Female: 102 (33.6) | NR             | AJCC 7 <sup>th</sup> stage: IA: 25 (8.2); IB: 71 (23.4); IIA: 30 (9.9); IIB: 41 (13.5); IIC: 28 (9.2); IIIA: 29 (9.5); IIIB: 46 (15.1); IIIC: 34 (11.2).                             | ECOG status 0: 204 (77.9) | AL: 19 (8.1) Nodular: 123 (52.6) SS: 69 (29.5) Other: 23 (9.8) | NR            |

| Study name           | Patient population                                    | Stage at diagnosis | Sample size (N) | Age (Year)                | Gender, n (%)                          | Race/ethnicity | Stage distribution                                                                                          | ECOG PS                  | Tumor histology                                                        | Comorbidities |
|----------------------|-------------------------------------------------------|--------------------|-----------------|---------------------------|----------------------------------------|----------------|-------------------------------------------------------------------------------------------------------------|--------------------------|------------------------------------------------------------------------|---------------|
|                      | Stage I at diagnosis                                  | Stage I            | 96              | Median: 55 (range: 18–82) | Male: 64 (66.7)<br>Female: 32 (33.3)   | NR             | AJCC 7 <sup>th</sup> stage:<br>IA: 25 (26)<br>IB: 71 (74)                                                   | ECOG status 0: 67 (80.7) | AL: 5 (7.8)<br>Nodular: 16 (25.0); SS: 38 (59.4); Other: 5 (7.8)       | NR            |
|                      | Stage II at diagnosis                                 | Stage II           | 99              | Median: 67 (range: 31–93) | Male: 69 (69.7)<br>Female: 30 (30.3)   | NR             | AJCC 7 <sup>th</sup> stage:<br>Stage II: Stage IIA: 30 (30.3); IIB: 41 (41.4); IIC: 28 (28.3).              | ECOG status 0: 72 (79.1) | AL: 4 (4.5)<br>Nodular: 57 (64.0)<br>SS: 13 (14.6)<br>Other: 15 (16.9) | NR            |
|                      | Stage III at diagnosis                                | Stage III          | 109             | Median: 57 (range: 20–84) | Male: 69 (63.3)<br>Female: 40 (36.7)   | NR             | AJCC 7 <sup>th</sup> stage:<br>IIIA: 29 (26.6); IIIB: 46 (42.2); IIIC: 34 (31.2)                            | ECOG status 0: 65 (73.9) | AL: 10 (12.3)<br>Nodular: 50 (61.7)<br>SS: 18 (22.2)<br>Other: 3 (3.7) | NR            |
| Winge-Main 2020 (28) | Patients with cutaneous melanoma                      | Overall            | 4,339           | Median: 72 (range: 60–82) | Male: 57.9%<br>Female: 42.1%           | NR             | ICD-10, AJCC8: Stage II: NR (IIB: 35.7; IIC: 17.7) (IIIA: 4; IIIB: 8.2; IIIC: 18.8; IIID: 2.7); IV: NR (13) | NR                       | NR                                                                     | NR            |
| <b>NSCLC</b>         |                                                       |                    |                 |                           |                                        |                |                                                                                                             |                          |                                                                        |               |
| Abrão 2021 (29)      | NSCLC Overall                                         | Overall            | 1,278           | NR                        | Male: 684 (53.5)<br>Female: 594 (46.5) | NR             | TNM 6 <sup>th</sup> and 7 <sup>th</sup> : Stage I: 853 (66.7); II: 425 (33.3)                               | NR                       | NR                                                                     | NR            |
| Abrão 2022 (30)      | Overall patients treated with surgery or radiotherapy | Stage I            | 681             | Mean: 64.5 (SD: 10.3)     | Male: 353 (51.8)<br>Female: 328 (48.2) | NR             | NR                                                                                                          | NR                       | NR                                                                     | NR            |
| Azzouqa 2019 (31)    | Patients with newly diagnosed NSCLC                   | All stages         | 10,010          | Median: 70                | Male: 53%<br>Female: 47%               | NR             | NR                                                                                                          | NR                       | NR                                                                     | NR            |

| Study name          | Patient population                                    | Stage at diagnosis            | Sample size (N) | Age (Year)                | Gender, n (%)                            | Race/ethnicity | Stage distribution                                                                                                                  | ECOG PS                                                                                        | Tumor histology                                          | Comorbidities |
|---------------------|-------------------------------------------------------|-------------------------------|-----------------|---------------------------|------------------------------------------|----------------|-------------------------------------------------------------------------------------------------------------------------------------|------------------------------------------------------------------------------------------------|----------------------------------------------------------|---------------|
| Berglund 2012 (7)   | Early stage NSCLC                                     | Stages IA-IIB                 | 1,828           | NR                        | NR                                       | NR             | NR                                                                                                                                  | NR                                                                                             | NR                                                       | NR            |
| Cerqueira 2022 (32) | Stage III/IV at diagnosis                             | Stage III/IV                  | 10,440          | NR                        | Male: 58.5%<br>Female: 41.5%             | NR             | Stage IV: 72.2%                                                                                                                     | NR                                                                                             | NR                                                       | NR            |
| Ehrenstein 2022 (8) | NSCLC stage I-IIIa with EGFR mutation status-Negative | EGFR mutation status-Negative | 3710            | NR                        | Male: 1623 (43.7)<br>Female: 2087 (56.3) | NR             | Stage I: Stage IA: 1437 (38.73) Stage IB: 673 (18.14) Stage II: Stage IIA: 188 (5.07) Stage IIB: 591 (15.93) Stage III: 821 (22.12) | Status 0: 1896 (54.6)<br>Status 1-2: 1443 (41.6)<br>Status >2: 133 (3.8)<br>Missing: 238 (6.4) | Adenocarcinoma: 3174 (85.6)<br>Other: 536 (14.4)         | NR            |
|                     | NSCLC stage I-IIIa with EGFR mutation status-Positive | EGFR mutation status-Positive | 361             | NR                        | Male: 107 (29.6)<br>Female: 254 (70.4)   | NR             | Stage I: Stage IA: 166 (45.98) Stage IB: 81 (22.44) Stage II: Stage IIA: 9 (2.49) Stage IIB: 43 (11.91) Stage III: 62 (17.17)       | Status 0: 225 (67.8)<br>Status 1-2: 104 (31.3)<br>Missing: 29 (8)                              | Adenocarcinoma: 331 (91.7)<br>Other: 30 (8.3)            | NR            |
|                     | Stage I-IIIa NSCLC                                    | Stage I-IIIa NSCLC            | 8758            | NR                        | Male: 4309 (49.2)<br>Female: 4449 (50.8) | NR             | NR                                                                                                                                  | Status 0: 4243 (52.7)<br>Status 1-2: 3451 (42.8)<br>Missing: 700 (8)                           | Adenocarcinoma: 4671 (53.3)<br>Other: 4087 (46.7)        | NR            |
| Ekman 2019 (33)     | Patients with incident NSCLC                          | All stages                    | 2,779           | Median: 70 (range: 22-96) | Male: 48.5%<br>Female: 51.5%             | NR             | Stage I: (NR) 19.3; II: (NR) 7.7; IIIA: (NR) 12.3; IIIB: (NR) 7.2; IV: (NR) 51.2                                                    | NR                                                                                             | Non-SCC: (NR) 70.9<br>SCC: (NR) 17.7<br>Other: (NR) 11.4 | NR            |

| Study name          | Patient population                                                                                              | Stage at diagnosis | Sample size (N) | Age (Year)                | Gender, n (%)                                | Race/ethnicity                                                     | Stage distribution                                                                                     | ECOG PS                                                                | Tumor histology                                                                                                                                             | Comorbidities |
|---------------------|-----------------------------------------------------------------------------------------------------------------|--------------------|-----------------|---------------------------|----------------------------------------------|--------------------------------------------------------------------|--------------------------------------------------------------------------------------------------------|------------------------------------------------------------------------|-------------------------------------------------------------------------------------------------------------------------------------------------------------|---------------|
| Flores 2021 (9)     | NSCLC Overall                                                                                                   | Overall            | 312,382         | Median: 68 (range: 60-76) | Male: 166657 (53.4)<br>Female: 145725 (46.7) | White: 249062 (79.7)<br>Black: 38201 (12.2)<br>Others: 24345 (7.8) | NR                                                                                                     | NR                                                                     | Squamous cell carcinoma: 81,948 (26.2), Adenocarcinoma: 163,086 (52.2), Other NSCLC: 67,348 (21.6)                                                          | NR            |
| Greystoke 2021 (34) | Patients with NSCLC with a record of systemic treatment in the SACT database of the Public Health England's CAS | Stage I-III        | 40,180          | Median: 67                | Male: 55%<br>Female: 45%                     | White: 90%<br>Caucasian: 90%                                       | Stage IB-III B: 5%<br>Non-resected Stage III B: 15%<br>Stage IV: 55%                                   | NR                                                                     | NR                                                                                                                                                          | NR            |
| Jazieh 2021 (35)    | Patients de novo locally advanced stage III NSCLC                                                               | Stage III          | 3151            | Median: 63 (range: 21-92) | Male: 2411 (76.5)<br>Female: 740 (23.5)      | NR                                                                 | AJCC 7 <sup>th</sup> : Stage I: NA (NA)<br>Stage III: 3151 (100); IIIA: 1568 (55.9); IIIB: 1239 (55.9) | Status 0: 663 (30.3)<br>Status 1: 1278 (58.4)<br>Status ≥2: 246 (11.3) | Adenocarcinoma: 1665 (53.7)<br>SCC/EC: 1134 (36.6)<br>Other: 96 (3.1)<br>Large cell carcinoma: 61 (2.0)<br>Mixed: 34 (1.1)<br>Bronchiole-alveolar: 14 (0.5) | NR            |

| Study name         | Patient population                                               | Stage at diagnosis            | Sample size (N) | Age (Year)                | Gender, n (%)                           | Race/ethnicity | Stage distribution                                                                                             | ECOG PS                                                               | Tumor histology                                                                                                                          | Comorbidities |
|--------------------|------------------------------------------------------------------|-------------------------------|-----------------|---------------------------|-----------------------------------------|----------------|----------------------------------------------------------------------------------------------------------------|-----------------------------------------------------------------------|------------------------------------------------------------------------------------------------------------------------------------------|---------------|
|                    | Stage III NSCLC – Africa and Middle East                         | Stage III                     | 1046            | Median: 61 (range: 24-89) | Male: 870 (83.2)<br>Female: 176 (16.8)  | NR             | AJCC 7 <sup>th</sup> : Stage I: NA (NA); III: 1046 (100); IIIA: 489 (58.9); IIIB: 341 (41.1); Unknown: NA (NA) | Status 0: 303 (33.9)<br>Status 1: 489 (54.7)<br>Status ≥2: 102 (11.4) | Adenocarcinoma: 480 (47.8)<br>SCC/EC: 432 (43.0)<br>Other: 9 (0.9)<br>LCC: 27 (2.7)<br>Mixed: 13 (1.3)<br>Bronchiole-alveolar: 11 (1.1)  | NR            |
|                    | Stage III NSCLC – Asia                                           | Stage III                     | 1874            | Median: 63 (range: 24-92) | Male: 1401 (74.8)<br>Female: 473 (25.2) | NR             | AJCC 7 <sup>th</sup> : Stage I: NA (NA); III: 1874 (100); IIIA: 976 (54.7); IIIB: 808(45.3); Unknown: NA (NA)  | Status 0: 295 (25.5)<br>Status 1: 735 (63.4)<br>Status ≥2: 129 (11.1) | Adenocarcinoma: 1039 (55.7)<br>SCC/EC: 648 (34.7)<br>Other: 76 (4.1)<br>LCC: 24 (1.3)<br>Mixed: 19 (1.0)<br>Bronchiole-alveolar: 3 (0.2) | NR            |
|                    | Stage III NSCLC – Latin America                                  | Stage III                     | 231             | Median: 65 (range: 21-89) | Male: 140 (60.6)<br>Female: 91 (39.4)   | NR             | AJCC 7 <sup>th</sup> : Stage I: NA (NA); III: 231 (100); IIIA: 103 (53.4); IIIB: 90 (46.6)                     | Status 0: 65 (48.5)<br>Status 1: 54 (40.3)<br>Status ≥2: 15 (11.2)    | Adenocarcinoma: 146 (64.0)<br>SCC/EC: 54 (23.7)<br>Other: 11 (4.8)<br>LCC: 10 (4.4)<br>Mixed: 2 (0.9)<br>Bronchiole-alveolar: 0          | NR            |
| Kalilani 2022 (36) | Patients with advanced stage NSCLC identified from SEER database | Advanced stage (Stage III/IV) | 182,693         | NR                        | NR                                      | NR             | Stage III: 49,298<br>Stage IV: 133,395                                                                         | NR                                                                    | NR                                                                                                                                       | NR            |

| Study name           | Patient population                                                   | Stage at diagnosis            | Sample size (N) | Age (Year) | Gender, n (%)                        | Race/ethnicity | Stage distribution                                      | ECOG PS                                                                                            | Tumor histology                                                               | Comorbidities |
|----------------------|----------------------------------------------------------------------|-------------------------------|-----------------|------------|--------------------------------------|----------------|---------------------------------------------------------|----------------------------------------------------------------------------------------------------|-------------------------------------------------------------------------------|---------------|
|                      | Patients with advanced stage NSCLC identified from Flatiron database | Advanced stage (Stage III/IV) | 4,358           | NR         | NR                                   | NR             | Stage IIIB: 1,045<br>Stage IIIC: 130<br>Stage IV: 3,210 | NR                                                                                                 | NR                                                                            | NR            |
| Klarenbeek 2022 (37) | NSCLC Stage III/IV                                                   | Stage III/IV                  | 10,306          | NR         | Male: 5878 (57)<br>Female: 4428 (43) | NR             | NR                                                      | Status 0: 2659<br>Status 1: 3159<br>ECOG >2: 192<br>Unknown: 3529                                  | NR                                                                            | NR            |
|                      | NSCLC Stage III                                                      | Stage III                     | 5038            | Median: 68 | NR                                   | NR             | NR                                                      | NR                                                                                                 | Adenocarcinoma: 5696<br>SCC: 2742<br>LCC: 1580<br>Other: 288                  | NR            |
|                      | NSCLC Stage III Chemoradiotherapy                                    | Stage III                     | 2,772           | NR         | Male: 1600 (58)<br>Female: 1172 (42) | NR             | NR                                                      | Status 0: 870 (31)<br>Status 1: 858 (31); 2: 116 (5);<br>>2: 16 (1)<br>Unknown: 912 (32)           | Adenocarcinoma: 1129 (41)<br>SCC: 1100 (40)<br>LCC: 506 (19)<br>Other: 37 (0) | NR            |
|                      | NSCLC Stage III Radiotherapy                                         | Stage III                     | 1,359           | NR         | Male: 861 (63)<br>Female: 498 (37)   | NR             | NR                                                      | Status 0: 226 (17)<br>Status 1: 338 (25)<br>Status 2: 211 (16);<br>>2: 91 (6)<br>Unknown: 493 (46) | Adenocarcinoma: 434 (32)<br>SCC: 572 (42)<br>LCC: 191 (14)<br>Other: 162 (12) | NR            |

| Study name        | Patient population                                          | Stage at diagnosis     | Sample size (N) | Age (Year) | Gender, n (%)                        | Race/ethnicity | Stage distribution | ECOG PS                                                                                       | Tumor histology                                                              | Comorbidities |
|-------------------|-------------------------------------------------------------|------------------------|-----------------|------------|--------------------------------------|----------------|--------------------|-----------------------------------------------------------------------------------------------|------------------------------------------------------------------------------|---------------|
|                   | NSCLC Stage III systemic therapy                            | Stage III              | 907             | NR         | Male: 513 (57)<br>Female: 394 (43)   | NR             | NR                 | Status 0: 213 (23)<br>Status 1: 272 (30); 2: 69 (8); >2: 11 (1)<br>Unknown: 342 (38)          | Adenocarcinoma: 414 (46)<br>SCC: 313 (35)<br>LCC: 156 (16)<br>Other: 24 (3)  | NR            |
|                   | NSCLC Stage IV                                              | Stage IV               | NR              | Median: 67 | NR                                   | NR             | NR                 | NR                                                                                            | NR                                                                           | NR            |
|                   | Stage IV systemic therapy                                   | Stage IV               | 5268            | NR         | Male: 2904 (55)<br>Female: 2364 (45) | NR             | NR                 | Status 0: 1350(26)<br>Status 1: 1691 (32);<br>2: 371 (7);<br>>2: 74 (1)<br>Unknown: 1782 (34) | Adenocarcinoma: 3719 (71)<br>SCC: 757 (14)<br>LCC: 727 (14)<br>Other: 65 (1) | NR            |
| Komiya 2020 (38)  | Patients with unresectable stage III NSCLC with T0 status   | Unresectable stage III | 458             | NR         | NR                                   | NR             | NR                 | NR                                                                                            | NR                                                                           | NR            |
|                   | Patients with unresectable stage III NSCLC with T1-4 status | Unresectable stage III | 84,263          | NR         | NR                                   | NR             | NR                 | NR                                                                                            | NR                                                                           | NR            |
| Luciano 2020 (39) | Advanced stage (stage III/IV) NSCLC patients                | Stage III/IV           | NR              | NR         | NR                                   | NR             | NR                 | NR                                                                                            | NR                                                                           | NR            |

| Study name         | Patient population                                                                                        | Stage at diagnosis                         | Sample size (N) | Age (Year)                | Gender, n (%)                         | Race/ethnicity                                                                                                                                               | Stage distribution                                                                                                                        | ECOG PS                                    | Tumor histology                                                                                        | Comorbidities |
|--------------------|-----------------------------------------------------------------------------------------------------------|--------------------------------------------|-----------------|---------------------------|---------------------------------------|--------------------------------------------------------------------------------------------------------------------------------------------------------------|-------------------------------------------------------------------------------------------------------------------------------------------|--------------------------------------------|--------------------------------------------------------------------------------------------------------|---------------|
| Martin 2022 (40)   | Patients with LA Stage III NSCLC classified according to 7 <sup>th</sup> and 8 <sup>th</sup> edition AJCC | Stage III                                  | 231             | Median: 65 (range: 21-89) | Male: 140 (60.6)<br>Female: 91 (39.4) | White: 69 (29.9)<br>Asian: East Asian: 1 (0.4)<br>Hispanic: 23 (10)<br>Others: Mestizo: 58 (25.1)<br>Mixed: 11 (4.8)<br>Other: 1 (0.4)<br>Unknown: 68 (29.4) | AJCC 7 <sup>th</sup> and 8 <sup>th</sup> : Stage III: Stage IIIA: 122 (52.81)<br>Stage IIIB: 106 (45.89)<br>Stage Unknown: 3 (1.29)       | Status 0: 65 (48.5)<br>Status 1: 54 (40.3) | Adenocarcinoma: 146 (64.0);<br>SCC/EC: 54 (23.7)<br>Other: 11 (4.8)<br>LCC: 10 (4.4)<br>Mixed: 2 (0.9) | NR            |
|                    | Patients with LA Stage IIIA NSCLC classified according to 7 <sup>th</sup> edition AJCC                    | Stage III                                  | 193             | NR                        | NR                                    | NR                                                                                                                                                           | AJCC 7 <sup>th</sup> : Stage III: Stage IIIA: 103 (53.4)<br>Stage IIIB: 90 (46.6)                                                         | NR                                         | NR                                                                                                     | NR            |
|                    | Patients with LA Stage IIIB NSCLC classified according to 8 <sup>th</sup> edition AJCC                    | Stage III                                  | 35              | NR                        | NR                                    | NR                                                                                                                                                           | AJCC 8 <sup>th</sup> : AJCC Stage III: Stage IIIA: 19 (54.29)<br>Stage IIIB: 16 (45.71)                                                   | NR                                         | NR                                                                                                     | NR            |
| Monteiro 2022 (10) | Overall                                                                                                   | Early stage NSCLC (clinical stages I-IIIa) | 91              | Mean: 62 (range: 29-83)   | Male: 40 (44)<br>Female: 51 (56)      | White: 57 (62.6)<br>Others: Non-white: 34 (37.4)                                                                                                             | AJCC 7 <sup>th</sup> : AJCC Stage I: Stage IA: 23 (25.3);<br>IB: 27 (29.7)<br>Stage IIA: 15 (16.5);<br>IIB: 11 (12.1);<br>IIIA: 15 (16.5) | Status 0: 33 (36.3)<br>Status 1: 58 (63.7) | Adenocarcinoma: 61 (67)<br>SCC: 25 (27.5)<br>Other: 5 (5.5)                                            | NR            |



| Study name         | Patient population                     | Stage at diagnosis | Sample size (N)                              | Age (Year)        | Gender, n (%)                                                                                | Race/ethnicity                                                                                                                                                                                                                           | Stage distribution                                                                                                                                                                                                                                                                           | ECOG PS | Tumor histology                                                                                                                                                                                                                                                                                                                                         | Comorbidities |
|--------------------|----------------------------------------|--------------------|----------------------------------------------|-------------------|----------------------------------------------------------------------------------------------|------------------------------------------------------------------------------------------------------------------------------------------------------------------------------------------------------------------------------------------|----------------------------------------------------------------------------------------------------------------------------------------------------------------------------------------------------------------------------------------------------------------------------------------------|---------|---------------------------------------------------------------------------------------------------------------------------------------------------------------------------------------------------------------------------------------------------------------------------------------------------------------------------------------------------------|---------------|
| Potter 2022 (41)   | Overall                                | Stage I-IV         | 2010-2013: n=314,107<br>2014-2018: n=449,367 | NR                | Male: NR (2010-2013: 52.3; 2014-2018: 50.8)<br>Female: NR (2010-2013: 47.7; 2014-2018: 49.2) | White:2010-2013: 247,136 (78.6); 2014-2018: 357,862 (79.6)<br>Black: 2010-2013: 37107 (11.8); 2014-2018: 52816 (11.8)<br>Asian:2010-2013: 7236 (2.3); 2014-2018: 12726 (2.8)<br>Hispanic: 2010-2013: 17326 (5.5); 2014-2018: 17014 (3.8) | ICD-0-3:<br>Stage I:<br>2010-2013: 86 609 (27.6)<br>2014-2018: 144 744 (32.2)<br>Stage II:<br>2010-2013: 27,405 (8.7)<br>2014-2018: 38,538 (8.6)<br>Stage III:<br>2010-2013: 63,004 (201)<br>2014-2018: 85,029 (18.9)<br>Stage IV:<br>2010-2013: 137 089 (43.6)<br>2014-2018: 181 056 (40.3) | NR      | Adenocarcinoma: 2010-2013: 153,268 (48.8); 2014-2018: 245,321 (54.6); SCC: 2010-2013: 88400 (28.1); 2014-2018: 126441 (28.1); LCC: 2010-2013: 7076 (2.3); 2014-2018: 7400 (1.6); ASCC: 2010-2013: 5071 (1.6); 2014-2018: 6402 (1.4); Carcinoid tumor: 2010-2013: 11211 (3.6); 2014-2018: 17563 (3.9); BC: 2010-2013:13558 (4.3); 2014-2018: 14755 (3.3) | NR            |
| Rittberg 2021 (42) | Patients diagnosed with stage IV NSCLC | Stage IV           | 3,601                                        | Mean: 62 (SD: NR) | Male: 53%<br>Female: 47%                                                                     | NR                                                                                                                                                                                                                                       | Stage IV: 3,601 (100)                                                                                                                                                                                                                                                                        | NR      | NR                                                                                                                                                                                                                                                                                                                                                      | NR            |

| Study name     | Patient population | Stage at diagnosis | Sample size (N) | Age (Year)                                                    | Gender, n (%)                         | Race/ethnicity | Stage distribution                                                                                                                 | ECOG PS | Tumor histology                                                                                                                               | Comorbidities |
|----------------|--------------------|--------------------|-----------------|---------------------------------------------------------------|---------------------------------------|----------------|------------------------------------------------------------------------------------------------------------------------------------|---------|-----------------------------------------------------------------------------------------------------------------------------------------------|---------------|
| Snee 2021 (11) | Overall            | Overall            | 3739            | Mean: 72.3 (SD: 10.9) Median: 73 (range: 18-101) [IQR: 65-80] | Male: 1881 (50.3) Female: 1858 (49.7) | NR             | UICC 6 <sup>th</sup> : Stage I: 717 (19.2) Stage II: 434 (11.6) Stage IIIA: 469 (12.5) Stage IIIB: 337 (9.0) Stage IV: 1782 (47.7) | NR      | Adenocarcinoma (NSQ): 1019 (27.3) Other NSQ: 93 (8.4) Squamous: 819 (21.9) NOS: 439 (11.7) LCC: 93 (2.5) Other: 88 (2.4) Unknown: 1281 (34.3) | NR            |
|                | NSQ NSCLC          | NSQ                | 1112            | Mean: 68.6 (SD: 11) Median: 69 (range: 31-101) [IQR: 62-77]   | Male: 519 (46.7) Female: 593 (53.3)   | NR             | UICC 6 <sup>th</sup> : Stage I: 223 (20.1) Stage II: 113 (10.2) Stage IIIA: 110 (9.9) Stage IIIB: 89 (8.0) Stage IV: 577 (51.9)    | NR      | Adenocarcinoma (NSQ): 1019 (27.3) Other NSQ: 93 (8.4)                                                                                         | NR            |
|                | SQ NSCLC           | SQ                 | 819             | Mean: 70.8 (SD: 9.4) Median: 71 (range: 33-96) [IQR: 64-77]   | Male: 505 (61.7) Female: 314 (38.3)   | NR             | UICC 6 <sup>th</sup> : Stage I: 127 (15.5) Stage II: 132 (6.1) Stage IIIA: 164 (20) Stage IIIB: 117 (14.3) Stage IV: 279 (34.1)    | NR      | 819 (100.0)                                                                                                                                   | NR            |

| Study name | Patient population                                | Stage at diagnosis                                | Sample size (N) | Age (Year)                                                         | Gender, n (%)                          | Race/ethnicity | Stage distribution                                                                                                               | ECOG PS | Tumor histology | Comorbidities |
|------------|---------------------------------------------------|---------------------------------------------------|-----------------|--------------------------------------------------------------------|----------------------------------------|----------------|----------------------------------------------------------------------------------------------------------------------------------|---------|-----------------|---------------|
|            | NSCLC NOS (not otherwise specified)<br>NSCLC      | NSCLC NOS                                         | 430             | Mean: 68.9 (SD: 10.6)<br>Median: 69 (range: 18-92)<br>[IQR: 63-77] | Male: 220 (50.1)<br>Female: 210 (49.9) | NR             | UICC 6 <sup>th</sup> : Stage I: 30 (6.8) Stage II: <40 (<9.1) Stage IIIA: 54 (12.3) Stage IIIB: <55 (<12.3) Stage IV: 263 (59.9) | NR      | 439 (100.0)     | NR            |
|            | Other NSCLC                                       | Other NSCLC                                       | 88              | Mean: 70.1 (SD: 10.7)<br>Median: 71 (range: 42-91)<br>[IQR: 63-78] | Male: 49 (55.7)<br>Female: 39 (44.3)   | NR             | UICC 6 <sup>th</sup> : Stage I: 19 (21.6) Stage II: <13 (<14.8) Stage IIIA: 8 (9.1) Stage IIIB: <5 (<6.0) Stage IV: 47 (53.4)    | NR      | 88 (100.0)      | NR            |
|            | Clinically diagnosed NSCLC with unknown pathology | Clinically diagnosed NSCLC with unknown pathology | 1281            | Mean: 78 (SD: 9.3)<br>Median: 79 (range: 43-99)<br>[IQR: 72-85]    | Male: 588 (45.9)<br>Female: 693 (54.1) | NR             | UICC 6 <sup>th</sup> : Stage I: 318 (24.8) Stage II: 137 (10.7) Stage IIIA: 133 (10.4) Stage IIIB: 77 (6) Stage IV: 616 (48.1)   | NR      | 1281 (100.0)    | NR            |
|            | Overall NSCLC during – 2007                       | Overall                                           | 255             | NR                                                                 | NR                                     | NR             | UICC 6 <sup>th</sup> : Stage I: NR (9.8); II: NR (18); IIIA: NR (16.5); IIIB: NR (11.0); IV: NR (44.7)                           | NR      | NR              | NR            |

| Study name | Patient population          | Stage at diagnosis | Sample size (N) | Age (Year) | Gender, n (%) | Race/ethnicity | Stage distribution                                                                                      | ECOG PS | Tumor histology | Comorbidities |
|------------|-----------------------------|--------------------|-----------------|------------|---------------|----------------|---------------------------------------------------------------------------------------------------------|---------|-----------------|---------------|
|            | Overall NSCLC during – 2008 | Overall            | 270             | NR         | NR            | NR             | UICC 6 <sup>th</sup> : Stage I: NR (10); II: NR (15.6); IIIA: NR (15.6); IIIB: NR (13.3); IV: NR (45.6) | NR      | NR              | NR            |
|            | Overall NSCLC during – 2009 | Overall            | 346             | NR         | NR            | NR             | UICC 6 <sup>th</sup> : Stage I: NR (8.1); II: NR (16.8); III: NR (17.3); IIIB: NR (11.0); IV: NR (46.8) | NR      | NR              | NR            |
|            | Overall NSCLC during – 2010 | Overall            | 342             | NR         | NR            | NR             | UICC 6 <sup>th</sup> : Stage I: NR (16.4); II: NR (8.8); IIIA: NR (12.0); IIIB: NR (5.9); IV: NR (57)   | NR      | NR              | NR            |
|            | Overall NSCLC during – 2011 | Overall            | 347             | NR         | NR            | NR             | UICC 6 <sup>th</sup> : Stage I: NR (18.4); II: NR (9.2); IIIA: NR (9.8); IIIB: NR (8.9); IV: NR (53.6)  | NR      | NR              | NR            |
|            | Overall NSCLC during – 2012 | Overall            | 385             | NR         | NR            | NR             | UICC 6 <sup>th</sup> : Stage I: NR (19); II: NR (7); IIIA: NR (9.6); IIIB: NR (10.7); IV: NR (53.8)     | NR      | NR              | NR            |
|            | Overall NSCLC during – 2013 | Overall            | 372             | NR         | NR            | NR             | UICC 6 <sup>th</sup> : Stage I: NR (21); II: NR (12.1); IIIA: NR (9.7); IIIB: NR (8.6); IV: NR (48.7)   | NR      | NR              | NR            |

| Study name       | Patient population                                           | Stage at diagnosis | Sample size (N) | Age (Year)                                                      | Gender, n (%)                          | Race/ethnicity | Stage distribution                                                                                                                          | ECOG PS | Tumor histology                                                             | Comorbidities |
|------------------|--------------------------------------------------------------|--------------------|-----------------|-----------------------------------------------------------------|----------------------------------------|----------------|---------------------------------------------------------------------------------------------------------------------------------------------|---------|-----------------------------------------------------------------------------|---------------|
|                  | Overall NSCLC during – 2014                                  | Overall            | 364             | NR                                                              | NR                                     | NR             | UICC 6 <sup>th</sup> : Stage I: NR (25.5); II: NR (10.7); IIIA: NR (11); IIIB: NR (7.4); IV: NR (45.3)                                      | NR      | NR                                                                          | NR            |
|                  | Overall NSCLC during – 2015                                  | Overall            | 356             | NR                                                              | NR                                     | NR             | UICC 6 <sup>th</sup> : Stage I: NR (25.8); II: NR (10.7); IIIA: NR (11.8); IIIB: NR (8.7); IV: NR (43)                                      | NR      | NR                                                                          | NR            |
|                  | Overall NSCLC during – 2016                                  | Overall            | 407             | NR                                                              | NR                                     | NR             | UICC 6 <sup>th</sup> : Stage I: NR (24.8); II: NR (11.1); IIIA: NR (11.8); IIIB: NR (7.4); IV: NR (45)                                      | NR      | NR                                                                          | NR            |
|                  | Overall NSCLC during – 2017 (Diagnosed up to 31 August 2017) | Overall            | 289             | NR                                                              | NR                                     | NR             | UICC 6 <sup>th</sup> : Stage I: NR (27.7); II: NR (10.4); IIIA: NR (14.9); IIIB: NR (8.0); IV: NR (39.1)                                    | NR      | NR                                                                          | NR            |
| Soares 2021 (43) | Overall (2012-2016 cohort)                                   | Overall            | 495             | Mean: 66.5 (SD: 10.1)<br>Median: 67 (range: 34-88) [IQR: 59-74] | Male: 369 (74.5)<br>Female: 126 (25.5) | NR             | International Association for the Study of Lung Cancer 7 <sup>th</sup> edition of TNM: Stage I: 174 (35.2); II: 86 (17.4); IIIA: 235 (47.5) | NR      | NSQ: 291 (58.8)<br>SQ: 167 (33.7)<br>NSCLC NOS: 21 (4.2)<br>Other: 16 (3.2) | NR            |

| Study name        | Patient population                                                       | Stage at diagnosis | Sample size (N) | Age (Year)                                                        | Gender, n (%)                         | Race/ethnicity | Stage distribution                                                                                                                        | ECOG PS | Tumor histology                                                            | Comorbidities                         |
|-------------------|--------------------------------------------------------------------------|--------------------|-----------------|-------------------------------------------------------------------|---------------------------------------|----------------|-------------------------------------------------------------------------------------------------------------------------------------------|---------|----------------------------------------------------------------------------|---------------------------------------|
|                   | Overall (2015-2016 cohort); treated patients                             | Overall            | 199             | Mean: 66.5 (SD: 9.9)<br>Median: 68 (range: 34-86)<br>[IQR: 59-74] | Male: 149 (74.9)<br>Female: 50 (25.1) | NR             | International Association for the Study of Lung Cancer 7 <sup>th</sup> edition of TNM: Stage I: 77 (38.7); II: 33 (16.6); IIIA: 89 (44.7) | NR      | NSQ: 119 (59.8)<br>NSQs: 68 (34.2)<br>NSCLC NOS: 7 (3.5)<br>Other: 5 (2.5) | NR                                    |
|                   | Stage I-II (2015-2016 cohort); treated patients; diagnosed at stage I-II | Stage I-II         | 102             | Mean: 66.8 (SD: 9.1)<br>Median: 67 (range: 34-85)<br>[IQR: 60-73] | Male: 74 (72.5)<br>Female: 28 (27.5)  | NR             | International Association for the Study of Lung Cancer 7 <sup>th</sup> edition of TNM: Stage I: 72 (70.6); II: 30 (29.4)                  | NR      | NSQ: 68 (66.7)<br>SQ: 28 (27.4)<br>NSCLC NOS: Masked<br>Other: Masked      | NR                                    |
|                   | Stage IIIA (2015-2016 cohort); treated patients; diagnosed at stage IIIA | Stage IIIA         | 78              | Mean: 64 (SD: 10.1)<br>Median: 63 (range: 38-83)<br>[IQR: 57-72]  | Male: 59 (75.6)<br>Female: 19 (24.4)  | NR             | International Association for the Study of Lung Cancer 7 <sup>th</sup> edition of TNM: Stage IIIA: 78 (100)                               | NR      | NSQ: 41 (52.6)<br>SQ: 33 (42.3)<br>NSCLC NOS: Masked<br>Other: Masked      | NR                                    |
| Suipyte 2019 (44) | Elderly and young patients with NSCLC                                    | Stage IV           | 499             | NR                                                                | NR                                    | NR             | NR                                                                                                                                        | NR      | NR                                                                         | NR                                    |
| Vachani 2021 (45) | Newly diagnosed patients                                                 | All stages         | 125,330         | Mean: 76.3                                                        | Male: 51%<br>Female: 49%              | NR             | NR                                                                                                                                        | NR      | NR                                                                         | HTN: 88%<br>CPD: 52%<br>Diabetes: 45% |

| Study name        | Patient population                                                                                                                                   | Stage at diagnosis | Sample size (N) | Age (Year)                | Gender, n (%)                          | Race/ethnicity | Stage distribution                                                                             | ECOG PS                                  | Tumor histology                                                                                               | Comorbidities |
|-------------------|------------------------------------------------------------------------------------------------------------------------------------------------------|--------------------|-----------------|---------------------------|----------------------------------------|----------------|------------------------------------------------------------------------------------------------|------------------------------------------|---------------------------------------------------------------------------------------------------------------|---------------|
| Van Dao 2022 (46) | Patients de novo locally advanced stage III NSCLC in Vietnam as per subgroup (7 <sup>th</sup> Edition AJCC)                                          | Stage III          | 149             | Median: 60 (range: 26-82) | Male: 113 (75.3)<br>Female: 37 (24.66) | NR             | AJCC 7 <sup>th</sup> : Stage III: Total stage III: 149 (100); IIIA: 65 (43.6); IIIB: 84 (56.4) | Status ≤1: 33 (75)<br>Status ≥2: 11 (25) | Adenocarcinoma: 90 (62.5)<br>Epidermoid or SCC: 38 (26.4)<br>LCC: 9 (6.2)<br>Other: 4 (2.8)<br>Mixed: 3 (2.1) | NR            |
| <b>RCC</b>        |                                                                                                                                                      |                    |                 |                           |                                        |                |                                                                                                |                                          |                                                                                                               |               |
| Haas 2022a (47)   | Patients with newly diagnosed, intermediate-high risk (pT2 N0 high grade, pT3 N0 any grade) or high-risk (pT4 N0 any grade, pT any N1 any grade) RCC | Overall            | 643             | Mean: 75.5 (SD: NR)       | Male: 61%<br>Female: 39%               | White: 86%     | NR                                                                                             | NR                                       | NR                                                                                                            | NR            |
| Haas 2022b (48)   | Patients stratified into intermediate-high (pT2N0 high grade, pT3N0) or high risk (pT4N0, pTanyN1) RCC                                               | Overall            | 274             | Median: 63.5              | Male: NR (66)<br>Female: NR (34)       | White: 78%     | NR                                                                                             | NR                                       | NR                                                                                                            | NR            |

| Study name   | Patient population  | Stage at diagnosis | Sample size (N) | Age (Year)                    | Gender, n (%)                               | Race/ethnicity                                                                                                                             | Stage distribution | ECOG PS | Tumor histology | Comorbidities |
|--------------|---------------------|--------------------|-----------------|-------------------------------|---------------------------------------------|--------------------------------------------------------------------------------------------------------------------------------------------|--------------------|---------|-----------------|---------------|
| Li 2021 (49) | Overall             | Overall            | 25,145          | Median: 60 [IQR: 52.00-69.00] | Male: 15792 (62.8)<br>Female: 9353 (37.2)   | White: 23559 (93.69)<br>Asian: 1586 (6.31)<br>Chinese: 274 (1.1)<br>Japanese: 189 (0.8)<br>South Asian: 164 (07)<br>Other Asian: 959 (3.8) | NR                 | NR      | NR              | NR            |
|              | Overall – White     | Overall            | 23,559          | Median: 60 [IQR: 52.00-69.00] | Male: 14703 (62.41)<br>Female: 8856 (37.59) | White: 23559 (100)                                                                                                                         | NR                 | NR      | NR              | NR            |
|              | Overall – Asian     | Overall            | 1586            | Median: 61 [IQR: 52.00-70.00] | Male: 1089 (68.66)<br>Female: 497 (31.34)   | Asian: Total: 1586<br>Chinese: 274<br>Japanese: 189<br>South Asian: 164<br>Other Asian: 959 (100)                                          | NR                 | NR      | NR              | NR            |
|              | Asian – Chinese     | Overall            | 274             | Median: 64 [IQR: 54.00-72.75] | Male: 193 (70.44)<br>Female: 81 (29.56)     | NR                                                                                                                                         | NR                 | NR      | NR              | NR            |
|              | Asian – Japanese    | Overall            | 189             | Median: 65 [IQR: 55.00-74.00] | Male: 135 (71.43)<br>Female: 54 (28.57)     | NR                                                                                                                                         | NR                 | NR      | NR              | NR            |
|              | Asian – South Asian | Overall            | 164             | Median: 56 [IQR: 46.00-65.00] | Male: 120 (73.17)<br>Female: 44 (26.83)     | NR                                                                                                                                         | NR                 | NR      | NR              | NR            |
|              | Asian – Other Asian | Overall            | 959             | Median: 58 [IQR: 48.00-68.00] | Male: 685 (72.47)<br>Female: 274 (28.53)    | NR                                                                                                                                         | NR                 | NR      | NR              | NR            |



| Study name     | Patient population                                                  | Stage at diagnosis | Sample size (N) | Age (Year)                    | Gender, n (%)                            | Race/ethnicity                                                                                                   | Stage distribution | ECOG PS | Tumor histology                   | Comorbidities |
|----------------|---------------------------------------------------------------------|--------------------|-----------------|-------------------------------|------------------------------------------|------------------------------------------------------------------------------------------------------------------|--------------------|---------|-----------------------------------|---------------|
|                | Asian – Other Asian                                                 | Overall            | 959             | Median: 61 [IQR: 52.00-69.00] | Male: 641 (66.84)<br>Female: 318 (33.16) | NR                                                                                                               | NR                 | NR      | NR                                | NR            |
| <b>TNBC</b>    |                                                                     |                    |                 |                               |                                          |                                                                                                                  |                    |         |                                   |               |
| Aly 2019a (50) | Metastatic TNBC – all patients                                      | Metastatic TNBC    | 625             | Mean: 76.8 (SD: 7.3)          | Male: 0 (0)<br>Female: 625 (100)         | White: Non-Hispanic white: 454 (72)<br>Black: Non-Hispanic black: 119 (19)<br>Hispanic: 38 (6)<br>Others: 14 (2) | NR                 | NR      | Tumor size, mean (SD) 115.5 (243) | NR            |
|                | Metastatic TNBC – No chemotherapy                                   | Metastatic TNBC    | 308             | Mean: 79 (SD: 7.7)            | Male: 0 (0)<br>Female: 308 (100)         | White: Non-Hispanic white: 221 (71)<br>Black: Non-Hispanic black: 65 (21)<br>Hispanic: 11 (3)<br>Others: 11 (3)  | NR                 | NR      | Tumor size, mean (SD) 93.8 (203)  | NR            |
|                | Metastatic TNBC – 1R only (Patients who received only one regimen)  | Metastatic TNBC    | 161             | Mean: 75.7 (SD: 6.6)          | Male: 0 (0)<br>Female: 161 (100)         | White: Non-Hispanic white: 115 (71)<br>Black: Non-Hispanic black: 30 (18)                                        | NR                 | NR      | Tumor size, mean (SD) 131.5 (268) | NR            |
|                | Metastatic TNBC – 2R only (Patients who received only two regimens) | Metastatic TNBC    | 88              | Mean: 73.5 (SD: 5)            | Male: 0 (0)<br>Female: 88 (100)          | White: Non-Hispanic white: 69 (78)<br>Black: Non-Hispanic black: 11 (12)                                         | NR                 | NR      | Tumor size, mean (SD) 118.5 (257) | NR            |

| Study name         | Patient population                                                   | Stage at diagnosis | Sample size (N) | Age (Year)                | Gender, n (%)                   | Race/ethnicity                                                                                                          | Stage distribution                                                                                                     | ECOG PS | Tumor histology                                                                                | Comorbidities |
|--------------------|----------------------------------------------------------------------|--------------------|-----------------|---------------------------|---------------------------------|-------------------------------------------------------------------------------------------------------------------------|------------------------------------------------------------------------------------------------------------------------|---------|------------------------------------------------------------------------------------------------|---------------|
|                    | Metastatic TNBC – 3R+ (Patients who received three or more regimens) | Metastatic TNBC    | 68              | Mean: 73.7 (SD: 5.8)      | Male: 0 (0)<br>Female: 68 (100) | White: Non-Hispanic white: 49 (72)<br>Black: Non-Hispanic black: 13 (19)                                                | NR                                                                                                                     | NR      | Tumor size, mean (SD)<br>170.5 (314)                                                           | NR            |
| Gogate 2022 (51)   | Early stage at diagnosis of TNBC                                     | Early stage        | 707             | NR                        | NR                              | NR                                                                                                                      | NR                                                                                                                     | NR      | NR                                                                                             | NR            |
|                    | Systemically treated patients with early stage TNBC                  | Early stage        | 462             | Median: 59                | NR                              | White:283 (61.3)<br>Asian:9 (1.9)<br>Hispanic: Hispanic or Latino: 1 (0.2) Others: Black or African American: 83 (18.0) | Tumor grade at initial diagnosis:<br>Grade 1: 5 (1.1)<br>Grade 2: 88 (19.0)<br>Grade 3: 365 (79.0)<br>Unknown: 4 (0.9) | NR      | IDC: 423 (91.6) ILC: 7 (1.5) IDM and ILM: 3 (0.6) MA: 0 (0.0) Other: 26 (5.6) Unknown: 3 (0.6) | NR            |
| Lehrberg 2021 (52) | Breast cancer White American                                         | Overall            | 1,391           | Mean: 61.6 (range: 23-91) | NR                              | White: 1391 (100)                                                                                                       | NR                                                                                                                     | NR      | Non-TNBC, Her2-: 905 (65.1) Non-TNBC, Her2+: 213 (15.3) TNBC: 145 (10.4) Missing: 128 (9.2)    | NR            |

| Study name         | Patient population             | Stage at diagnosis     | Sample size (N) | Age (Year)                | Gender, n (%) | Race/ethnicity                                                          | Stage distribution | ECOG PS | Tumor histology                                                                                                 | Comorbidities                                               |
|--------------------|--------------------------------|------------------------|-----------------|---------------------------|---------------|-------------------------------------------------------------------------|--------------------|---------|-----------------------------------------------------------------------------------------------------------------|-------------------------------------------------------------|
|                    | Breast cancer African American | Overall                | 907             | Mean: 60.1 (range: 21-92) | NR            | African American: 907 (100)                                             | NR                 | NR      | Non-TNBC, Her2-: 494 (54.5) Non-TNBC, Her2+: 152 (16.8) TNBC: 141 (15.5) Missing: 120 (13.2)                    | NR                                                          |
|                    | Breast cancer White American   | Sentinel node negative | 526             | Mean: 61.8 (range: 31-91) | NR            | White: 526 (100)                                                        | NR                 | NR      | Non-TNBC, Her2-: 905 (65.1) Non-TNBC, Her2+: 213 (15.3) TNBC: 145 (10.4) Missing: 128 (9.2)                     | NR                                                          |
|                    | Breast cancer African American | Sentinel node negative | 918             | Mean: 60.4 (range: 27-92) | NR            | African American: 918 (100)                                             | NR                 | NR      | Non-TNBC, Her2-: 494 (54.5) Non-TNBC, Her2+: 152 (16.8) TNBC: 141 (15.5) Missing: 120 (13.2)                    | NR                                                          |
| Schwartz 2018 (12) | AJCC Stage III                 | Stage III              | 828             | NR                        | NR            | White: 634 (76.6) Black: 117 (14.1) Hispanic: 43 (5.2) Others: 34 (4.1) | NR                 | NR      | Ductal: 629 (76.0%) Lobular: 27 (3.3%) Mixed: 49 (5.9%) Inflammatory: 29 (3.5%) NOS: 30 (3.6%) Other: 64 (7.7%) | CCI: 0: 383 (46.3) 1: 216 (26.1) 2: 105 (12.7) >3: 124 (15) |

| Study name        | Patient population                                    | Stage at diagnosis  | Sample size (N) | Age (Year)                | Gender, n (%)                    | Race/ ethnicity                                                        | Stage distribution | ECOG PS | Tumor histology                                                                                                                 | Comorbidities                                                         |
|-------------------|-------------------------------------------------------|---------------------|-----------------|---------------------------|----------------------------------|------------------------------------------------------------------------|--------------------|---------|---------------------------------------------------------------------------------------------------------------------------------|-----------------------------------------------------------------------|
|                   | AJCC Stage IV                                         | Stage IV            | 416             | NR                        | NR                               | White: 297 (71.4) Black: 86 (20.7) Hispanic: 22 (5.3) Others: 11 (2.6) | NR                 | NR      | Ductal: 286 (68.8%)<br>Lobular: 19 (4.6%)<br>Mixed: 15 (3.6%)<br>Inflammatory: 13 (3.1%)<br>NOS: 54 (13.0%)<br>Other: 29 (7.0%) | CCI:<br>0: 209 (50.2)<br>1: 102 (24.5)<br>2: 54 (13)<br>>3: 51 (12.3) |
| Sieluk 2020 (53)  | All stages (II and III)                               | Stages (II and III) | 1569            | NR                        | Male: <1%<br>Female: >99%        | NR                                                                     | NR                 | NR      | NR                                                                                                                              | NR                                                                    |
|                   | All stages (II and III-- adjuvant cohort              | Stages (II and III) | 1162            | NR                        | NR                               | NR                                                                     | Stage II: 928 (80) | NR      | NR                                                                                                                              | NR                                                                    |
|                   | All stages (II and III-- neoadjuvant cohort           | Stages (II and III) | 94              | NR                        | NR                               | NR                                                                     | Stage II: 48 (51)  | NR      | NR                                                                                                                              | NR                                                                    |
|                   | All stages (II and III-- neoadjuvant+ adjuvant cohort | Stages (II and III) | 313             | NR                        | NR                               | NR                                                                     | Stage II: 165 (53) | NR      | NR                                                                                                                              | NR                                                                    |
| Yousefi 2017 (54) | TNBC overall                                          | Overall             | 180             | Median: 48 (range: 23-85) | Male: 0 (0)<br>Female: 180 (100) | NR                                                                     | NR                 | NR      | NR                                                                                                                              | NR                                                                    |

Abbreviations: 1R: One regimen; 2R: Two regimens; 3R+: Three or more regimens; 5-FU: Fluorouracil; AI: American Indian; AJCC: American Joint Committee on Cancer; AL: Acral lentiginous; AN: Alaska native; ASCC: Adenosquamous cell carcinoma; BC: Bronchioloalveolar carcinoma; CA: Cerebrovascular accident; CaEto: Carboplatin and etoposide; CaG: Carboplatin and gemcitabine; CAS: Cancer analysis system; CCI: Charlson Comorbidity Index; CHF: Congestive heart failure; COPD: Chronic pulmonary obstructive disease; CPD: Chronic pulmonary disease; EC: Epidermoid carcinoma; ECOG PS: Eastern Cooperative Oncology Group performance score; EGFR: Estimated glomerular filtration rate; GC: Gemcitabine and cisplatin; Gem: Gemcitabine; HER2: Human epidermal growth factor receptor 2; HTN: Hypertension; ICD: International Classification of Diseases; IDC: Invasive ductal carcinoma; IDM: Infiltrating ductal mixed; ILC: Invasive lobular carcinoma; ILM: Infiltrating lobular mixed; IQR: Interquartile range; LA: Locally advanced; LCC: Large cell carcinoma; MA: Mucinous adenocarcinoma; MI: Myocardial infarction; MVAC: Methotrexate, vinblastine, doxorubicin and cisplatin; NA: Not available; NOS: Not otherwise specified; NPCR: National Program of Cancer Registries; NR: Not reported; NSCLC: Non-small cell lung cancer; NSQ: Non-squamous; RCC: Renal cell carcinoma; RD: Renal disease; SACT: Systemic anticancer therapy; SCC: Squamous cell carcinoma; SCNCC: Small-cell neuroendocrine carcinoma; SD: Standard deviation; SEER: Surveillance, Epidemiology, and End Results Program; SQ: Squamous; SRCC: Signet ring cell carcinoma; SS: Superficial spreading; TNBC: Triple negative breast cancer; TNM: Tumor (T), nodes (N), and metastases (M); UC: Urothelial cancer; UICC: Union for International Cancer Control

## 5 Summary of studies identified for humanistic burden review

### Humanistic burden study summaries

| Study name                                             | Objective                                                                                                                                                                 | Study design                           | Publication type    | Country | Data source                                                  | Study setting             | Time frame                        | QoL scale                               |
|--------------------------------------------------------|---------------------------------------------------------------------------------------------------------------------------------------------------------------------------|----------------------------------------|---------------------|---------|--------------------------------------------------------------|---------------------------|-----------------------------------|-----------------------------------------|
| <b>Melanoma</b>                                        |                                                                                                                                                                           |                                        |                     |         |                                                              |                           |                                   |                                         |
| <b>Toscano 2020 (5)</b>                                | Assess the association of LOC and coping changes, with change in HRQoL in newly diagnosed breast cancer and melanoma patients at 1-, 6-, 12-, and 24-month post-diagnosis | Prospective longitudinal study         | Article             | France  | Department of Onco-Dermatology and the Cancerology Institute | Hospital-based            | November 2010 to December 2012    | EORTC QLQ-C30, Brief cope questionnaire |
| <b>NSCLC</b>                                           |                                                                                                                                                                           |                                        |                     |         |                                                              |                           |                                   |                                         |
| <b>Tjong 2021<br/>Linked to:<br/>Michael 2021 (55)</b> | Examine moderate-to-severe symptom burden in the 12 months following diagnosis of stage IV NSCLC                                                                          | Population-based study                 | Conference abstract | Canada  | Administrative database                                      | Database                  | January 2007-September 2018       | ESAS questionnaire                      |
| <b>Bladder cancer</b>                                  |                                                                                                                                                                           |                                        |                     |         |                                                              |                           |                                   |                                         |
| <b>Yu 2019 (56)</b>                                    | Quantify HRQoL of patients with bladder cancer around the time of diagnosis                                                                                               | Semi-structured face-to-face interview | Article             | UK      | Participants in Bladder Cancer Prognoses Program             | Multi-Center cohort study | 19 December 2005 to 21 April 2011 | EORTC QLQ-C30 questionnaire             |

Abbreviations EORTC QLQ-C30: European Organization for the Research and Treatment of Cancer Core Quality of Life Questionnaire; ESAS: Edmonton symptom assessment system ; HRQoL: Health-related quality of life; LOC: Locus-of-control; NSCLC: Non-small cell lung cancer; QoL: Quality of life; UK: United Kingdom

## 6 Summary of studies identified for economic burden review

| Study name                  | Tumor Type                  | Objective                                                                                                                   | Study design                                 | Publication type    | Country | Data source                            | Study setting               | Time frame                        | Duration of follow up                                                                                                                    | Study perspective                 | Cost year |
|-----------------------------|-----------------------------|-----------------------------------------------------------------------------------------------------------------------------|----------------------------------------------|---------------------|---------|----------------------------------------|-----------------------------|-----------------------------------|------------------------------------------------------------------------------------------------------------------------------------------|-----------------------------------|-----------|
| <b>Bladder cancer</b>       |                             |                                                                                                                             |                                              |                     |         |                                        |                             |                                   |                                                                                                                                          |                                   |           |
| <b>Aly 2019 (57)</b>        | Bladder (urothelial) cancer | To assess the lifetime costs by stage that will help understand the economic burden of Urothelial Carcinoma                 | Retrospective cohort study                   | Conference abstract | USA     | SEER database                          | Nationwide population based | 2004-2013                         | Median [IQR], months:<br>Stage 0: 44 [23-71]<br>Stage I: 33 [15-62]<br>Stage II: 17 [7-39]<br>Stage III: 17 [7-42]<br>Stage IV: 8 [3-18] | NR                                | NR        |
| <b>Sorup 2021 (17)</b>      | Urothelial Cancer           | To characterize treatment patterns, survival outcomes, and healthcare resource use in patients with stage IV UC in Denmark. | Population-based, retrospective cohort study | Conference abstract | Denmark | Danish Cancer Registry                 | Nationwide population based | January 1, 2013-December 31, 2017 | Median: 10.2 months (IQR, 3.6-19.4)                                                                                                      | NR                                | NR        |
| <b>Head and neck cancer</b> |                             |                                                                                                                             |                                              |                     |         |                                        |                             |                                   |                                                                                                                                          |                                   |           |
| <b>Singh 2021 (3)</b>       | Oral cancer                 | To determine the direct healthcare costs of oral cancer at a single major tertiary provider in India                        | Cost of illness (prospective)                | Article             | India   | Institutional database of the hospital | Single center               | October 2019 to March 2020        | NR                                                                                                                                       | Healthcare provider's perspective | 2018-2019 |



| Study name               | Tumor Type | Objective                                                                                                                                                                                                                            | Study design                      | Publication type    | Country | Data source                    | Study setting               | Time frame           | Duration of follow up     | Study perspective | Cost year |
|--------------------------|------------|--------------------------------------------------------------------------------------------------------------------------------------------------------------------------------------------------------------------------------------|-----------------------------------|---------------------|---------|--------------------------------|-----------------------------|----------------------|---------------------------|-------------------|-----------|
| <b>NSCLC</b>             |            |                                                                                                                                                                                                                                      |                                   |                     |         |                                |                             |                      |                           |                   |           |
| <b>Buck 2015 (58)</b>    | NSCLC      | Describe patterns of systemic treatment, clinical characteristics of patients by stage, DFS, treatment patterns by starting date of adjuvant treatment from diagnosis and health care resource utilization and cost by disease stage | Retrospective observational study | Article             | USA     | Vector Oncology Data Warehouse | Nationwide population based | Jan 2007 to Jan2014  | NR                        | NR                | 2013      |
| <b>Gildea 2017 (59)</b>  | NSCLC      | Assess the wait time to diagnose NSCLC and the health care utilization and the costs of diagnosing and treating the disease based on the stage of diagnosis                                                                          | Retrospective cohort study        | Article             | USA     | Optum Research Database        | Nationwide population based | Jan 2007 to Sep 2011 | Mean (SD):1.1 (0.9) Years | NR                | NR        |
| <b>Vachani 2021 (45)</b> | NSCLC      | Quantify the association of stage at diagnosis with OS and monthly healthcare                                                                                                                                                        | Retrospective observational study | Conference abstract | USA     | SEER Database                  | Nationwide population based | 2006-2015            | 12 months                 | NR                | 2020      |

| Study name                 | Tumor Type | Objective                                                                                                                                                | Study design                       | Publication type | Country | Data source                 | Study setting                  | Time frame                    | Duration of follow up                            | Study perspective                 | Cost year |
|----------------------------|------------|----------------------------------------------------------------------------------------------------------------------------------------------------------|------------------------------------|------------------|---------|-----------------------------|--------------------------------|-------------------------------|--------------------------------------------------|-----------------------------------|-----------|
|                            |            | expenditures in the first year after diagnosis in patients with NSCLC.                                                                                   |                                    |                  |         |                             |                                |                               |                                                  |                                   |           |
| <b>TNBC</b>                |            |                                                                                                                                                          |                                    |                  |         |                             |                                |                               |                                                  |                                   |           |
| <b>Aly 2019a (50)</b>      | TNBC       | Estimate the overall survival, treatment patterns and economic burden of elderly metastatic TNBC patients.                                               | Retrospective, observational study | Article          | USA     | SEER-Medicare database      | National wide population based | 2004 - 2011                   | Mean: 14.1 months                                | NR                                | 2017      |
| <b>Haiderali 2021 (60)</b> | TNBC       | Examined real-world HCRU and costs in patients diagnosed with early stage (II-III B) TNBC                                                                | Retrospective, observational study | Article          | USA     | Concert AI Oncology Dataset | Nationwide population based    | 1 March 2008 to 31 March 2016 | Median: 46.1 months (From the date of diagnosis) | Healthcare provider's perspective | NR        |
| <b>Schwartz 2018 (12)</b>  | TNBC       | Identify and characterize elderly patients with advanced TNBC with respect to baseline demographics and comorbidities, treatment, including chemotherapy | Retrospective analysis             | Article          | USA     | SEER                        | National wide population based | Jan 2007 to Jan 2011          | Through to December 31, 2013                     | NR                                | 2013      |

| Study name              | Tumor Type | Objective                                                                                                                                                                 | Study design  | Publication type    | Country | Data source            | Study setting | Time frame  | Duration of follow up                           | Study perspective | Cost year |
|-------------------------|------------|---------------------------------------------------------------------------------------------------------------------------------------------------------------------------|---------------|---------------------|---------|------------------------|---------------|-------------|-------------------------------------------------|-------------------|-----------|
|                         |            | regimens, by specific type of therapy, survival patterns, HRU and costs.                                                                                                  |               |                     |         |                        |               |             |                                                 |                   |           |
| <b>Sieluk 2020 (53)</b> | TNBC       | To provide insights into patient characteristics, as well as clinical and economic outcomes for elderly patients with early stage TNBC, treated from 2010-2016 in the USA | Retrospective | Conference abstract | USA     | SEER-Medicare database | Multicenter   | 2010 - 2015 | Overall, median (range): 20.2 months (2.4-84.1) | NR                | NR        |

Abbreviations: HRU: Healthcare resource utilization; IQR: Inter quartile range; NR: Not reported; NSCLC: Non-small cell lung cancer; OS: Overall survival; SEER: Surveillance, Epidemiology, and End Results; TNBC: Triple negative breast cancer; UC: Urothelial cancer; USA: United States of America

## 7 Geographic distribution of included studies

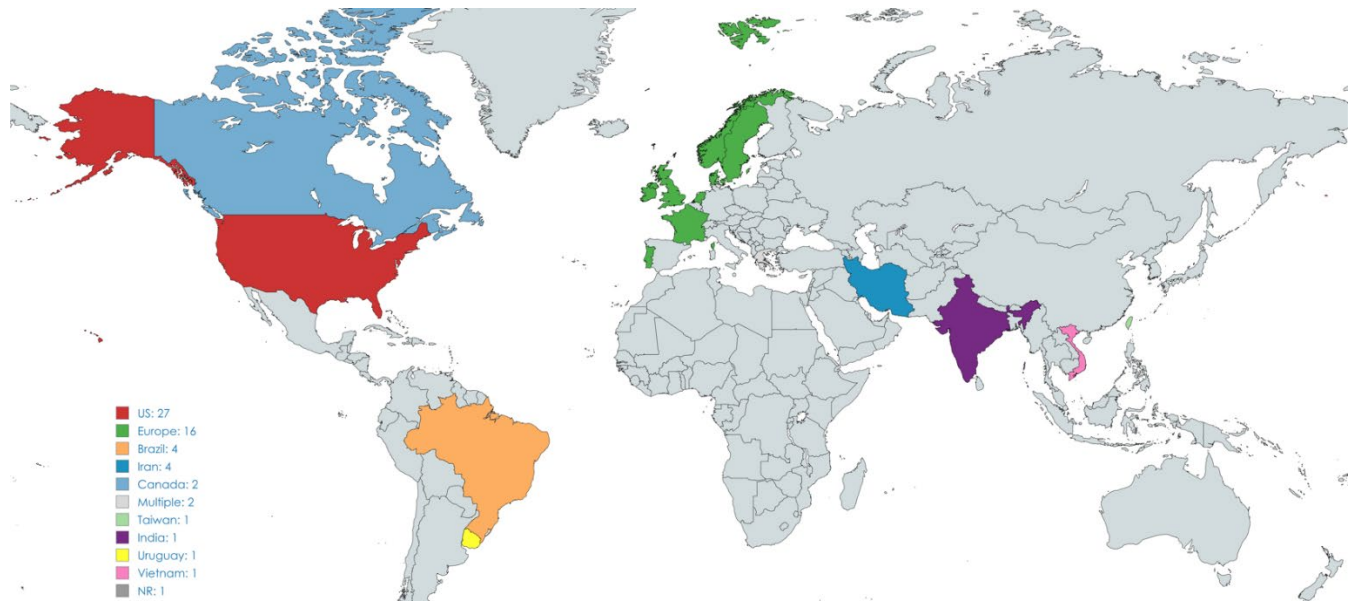

\*Studies in Europe comprised of UK: 6 studies; Denmark: 4 studies; Norway: 1 study; Netherlands: 2 studies; Sweden: 1 study; Switzerland: 1 study; Portugal: 1 study; France: 1 study; Abbreviations: UK; United Kingdom; US: United States

## 8 Summary for median OS outcomes by tumor type and disease stage

| Study name                    | Patient population                                                                      | Stage at diagnosis | Sample size (N) | Time point                          | Results, months (95% CI)    | p-value      |
|-------------------------------|-----------------------------------------------------------------------------------------|--------------------|-----------------|-------------------------------------|-----------------------------|--------------|
| <b>Bladder cancer</b>         |                                                                                         |                    |                 |                                     |                             |              |
| <b>Aragon-Ching 2021 (14)</b> | Urothelial carcinoma                                                                    | Stage 0 and I      | 29,743          | NR                                  | Median: 80.53 (78.13–83.25) | NR           |
|                               | Non-urothelial carcinoma                                                                | Stage 0 and I      | 561             | NR                                  | Median: 28.98 (20.3–46.78)  | 0.001 vs. UC |
|                               | Urothelial carcinoma                                                                    | Stage II and III   | 29,743          | NR                                  | Median: 35.65 (33.38–38.05) | NR           |
|                               | Non-urothelial carcinoma                                                                | Stage II and III   | 561             | NR                                  | Median: 15.75 (11.17–26.87) | Significant  |
|                               | Urothelial carcinoma                                                                    | Stage IV           | 29,743          | NR                                  | Median: 8.57 (8.05–9.10)    | NR           |
|                               | Non-urothelial carcinoma                                                                | Stage IV           | 561             | NR                                  | Median: 7 (5.62–9.26)       | 0.283 vs. UC |
| <b>Davies 2020 (15)</b>       | Patients with metastatic urothelial cancer                                              | Metastatic         | 2,543           | NR                                  | Median: 5.8 (5.4–6.3)       | NR           |
| <b>Fisher 2018 (1)</b>        | Overall Population (including untreated patients)                                       | Stage IV           | 502             | From start of 1L                    | Median: 8.4 (7.5–9.6)       | NR           |
|                               |                                                                                         | Stage IV           | 265             | From start of 2L                    | Median: 4.4 (3.6–5.0)       | NR           |
|                               | Overall – Treated population                                                            | Stage IV           | 321             | From start of 1L                    | Median: 11 (9.7–12.2)       | NR           |
|                               |                                                                                         | Stage IV           | 147             | From start of 2L                    | Median: 5.3 (4.5–6.5)       | NR           |
|                               | Overall – From diagnosis                                                                | Stage IV           | 508             | From stage IV diagnosis             | Median: 9.4 (8.3–10.7)      | NR           |
| <b>Omland 2021 (16)</b>       | All patients with metastatic Urinary tract Cancer who initiated first-line chemotherapy | Metastatic         | 952             | NR                                  | Median: 11.7 (10.8–12.5)    | NR           |
| <b>Sorup 2021 (17)</b>        | Patients with incident stage IV UC                                                      | Stage IV           | 620             | Median: 10.2 (IQR, 3.6–19.4) months | Median: 9.4 (8.3–10.6)      | NR           |

| Study name                    | Patient population                                  | Stage at diagnosis | Sample size (N) | Time point | Results, months (95% CI) | p-value |
|-------------------------------|-----------------------------------------------------|--------------------|-----------------|------------|--------------------------|---------|
| <b>Gastric cancer</b>         |                                                     |                    |                 |            |                          |         |
| <b>Dijksterhuis 2022 (18)</b> | Patients diagnosed with distant interval metastases | Metastatic         | 164             | NR         | Median: 5.5 (2.3-10.2*)  | NR      |
| <b>Qiu 2018 (19)</b>          | Overall                                             | Overall            | 19,022          | NR         | Median: 14               | NR      |
|                               | No metastasis                                       | No metastasis      | 11,230          | NR         | Median: 37               | NR      |
|                               | With liver metastases                               | Metastatic         | 3,218           | NR         | Median: 4                | NR      |
|                               | With lung metastases                                |                    | 1,126           | NR         | Median: 3                | NR      |
|                               | With bone metastases                                |                    | 966             | NR         | Median: 4                | NR      |
|                               | With brain metastases                               |                    | 151             | NR         | Median: 3                | NR      |
|                               | Metastases on one site: Only liver                  |                    | 2,247           | NR         | Median: 5                | NR      |
|                               | Metastases on one site: Only lung                   |                    | 396             | NR         | Median: 5                | NR      |
|                               | Metastases on one site: Only bone                   |                    | 487             | NR         | Median: 4                | NR      |
|                               | Metastases on one site: Only brain                  |                    | 52              | NR         | Median: 3                | NR      |
|                               | Metastases on two sites: Lung and liver             |                    | 428             | NR         | Median: 3                | NR      |
|                               | Metastases on two sites: Lung and bone              |                    | 92              | NR         | Median: 4                | NR      |
|                               | Metastases on two sites: Lung and brain             |                    | 12              | NR         | Median: 3                | NR      |
|                               | Metastases on two sites: Liver and bone             |                    | 172             | NR         | Median: 4                | NR      |
|                               | Metastases on two sites: Liver and brain            |                    | 18              | NR         | Median: 1                | NR      |
|                               | Metastases on two sites: Bone and brain             |                    | 15              | NR         | Median: 2                | NR      |
|                               | Metastases on three sites: Lung, liver and bone     |                    | 102             | NR         | Median: 3                | NR      |

| Study name                  | Patient population                                                     | Stage at diagnosis | Sample size (N) | Time point | Results, months (95% CI) | p-value               |
|-----------------------------|------------------------------------------------------------------------|--------------------|-----------------|------------|--------------------------|-----------------------|
|                             | Metastases on three sites: Lung, liver and brain                       |                    | 17              | NR         | Median: 2                | NR                    |
|                             | Metastases on three sites: Liver, bone, brain                          |                    | 7               | NR         | Median: 3                | NR                    |
|                             | Metastases on three sites: Lung and bone and brain                     |                    | 6               | NR         | Median: 1                | NR                    |
|                             | Metastases on four sites: Liver, lung, bone and brain                  |                    | 11              | NR         | Median: 2                | NR                    |
|                             | Metastases on four sites: Metastasis to other sites                    |                    | 3,060           | NR         | Median: 7                | NR                    |
|                             | Metastases on four sites: Metastasis to unknown sites                  |                    | 670             | NR         | Median: 4                | NR                    |
| <b>Head and Neck Cancer</b> |                                                                        |                    |                 |            |                          |                       |
| <b>Amarillo 2021 (20)</b>   | Patients who received treatment                                        | All stages         | 377             | 6.9 years  | Median: 29.16 (23–35)    | NR                    |
|                             | Patients with localized disease who received treatment                 | Stage I-II         | 97              | 6.9 years  | Median: 84.1             | p<0.0001 vs localized |
|                             | Patients with localized disease who received treatment: TDT <40.5 days | Stage I-II         | NR              | 6.9 years  | Median: 116.3            | NR                    |
|                             | Patients with localized disease who received treatment: TDT ≥40.5 days | Stage I-II         | NR              | 6.9 years  | Median: 55               | NR                    |
|                             | Patients with advanced disease who received treatment                  | Stage III-IV       | 357             | 6.9 years  | Median: 24.1             | p<0.0001 vs localized |

| Study name                     | Patient population                                                    | Stage at diagnosis     | Sample size (N) | Time point                  | Results, months (95% CI)  | p-value                                |
|--------------------------------|-----------------------------------------------------------------------|------------------------|-----------------|-----------------------------|---------------------------|----------------------------------------|
|                                | Patients with advanced disease who received treatment: TDT <40.5 days | Stage III-IV           | NR              | 6.9 years                   | Median: 27.6              | p=0.009 vs. TDT <40.5 days             |
|                                | Patients with advanced disease who received treatment: TDT ≥40.5 days | Stage III-IV           | NR              | 6.9 years                   | Median: 21.1              | p=0.009 vs. TDT <40.5 days             |
| <b>Hochfelder 2020 (21)</b>    | Hypopharyngeal squamous cell carcinoma patients                       | Stage III or IV, M0    | 5,272           | NR                          | Median: 22.6 (11.1–47.3*) | NR                                     |
| <b>Melanoma</b>                |                                                                       |                        |                 |                             |                           |                                        |
| <b>Ngo 2020 (25)</b>           | Stage II cutaneous melanoma                                           | Stage II               | 81              | After relapse               | NR                        | 0.57 vs stage III                      |
|                                | Having multiple lesions (≥ 10) on relapse                             | Stage II and Stage III | NR              |                             | Median: 7.2***            | NR                                     |
|                                | Patients having just 1 lesion on relapse                              | Stage II and Stage III | NR              |                             | Median: 8.4***            | p<0.001 vs multiple lesions on relapse |
|                                | Patients in whom >1 organ systems were involved                       | Stage II and Stage III | NR              |                             | Median: 8.4***            | NR                                     |
|                                | Patients in whom single organ system was involved                     | Stage II and Stage III | NR              |                             | Median: 21.6***           | p=0.009 vs >1 organ involved           |
| <b>Song 2015 (4)</b>           | Stage IIIB/C at diagnosis                                             | Stage IIIB/C           | 74              | Mean: 11.3 months (SD 13.8) | Median: 24.3              | NR                                     |
|                                | Stage IV M1A at diagnosis                                             | Stage IV M1A           | 212             |                             | Median: 22.3              | NR                                     |
|                                | Stage IV M1B at diagnosis                                             | Stage IV M1B           | 292             |                             | Median: 11.2              | NR                                     |
|                                | Stage IV M1C at diagnosis                                             | Stage IV M1C           | 1104            |                             | Median: 5.1               | NR                                     |
| <b>Tjokrowidjaja 2021 (27)</b> |                                                                       | Stage IIC              | 1,441           | NR                          | Median: 46                | NR                                     |
|                                |                                                                       | Stage IIIC             | 925             | NR                          | Median: 36                | NR                                     |



| Study name               | Patient population                                                                                                  | Stage at diagnosis | Sample size (N) | Time point        | Results, months (95% CI) | p-value                  |
|--------------------------|---------------------------------------------------------------------------------------------------------------------|--------------------|-----------------|-------------------|--------------------------|--------------------------|
|                          | Survivor function of patients with melanoma to the skin who are pathologically staged; AJCC 7 <sup>th</sup> edition | Stage IV           | 2,603           | NR                | Median: 9                | NR                       |
|                          | Survivor function of patients with melanoma to the skin who are pathologically staged; AJCC 8 <sup>th</sup> edition | Stage IIC          | 1,445           | NR                | Median: 46               | NR                       |
|                          |                                                                                                                     | Stage IIIC         | 1,730           | NR                | Median: 46               | NR                       |
|                          |                                                                                                                     | Stage IIID         | 54              | NR                | Median: 22               | NR                       |
|                          | Survivor function of patients with melanoma to the skin who are clinically staged; AJCC 7 <sup>th</sup> edition     | Stage IV           | 2,604           | NR                | Median: 9                | NR                       |
|                          |                                                                                                                     | Stage IIC          | 1,441           | Median: 27 months | Median: 46               | NR                       |
|                          |                                                                                                                     | Stage IV           | 2,603           |                   | Median: 9                | NR                       |
|                          |                                                                                                                     | Stage IIC          | 1,446           |                   | Median: 46               | NR                       |
|                          | Stage IV                                                                                                            | 2,604              | Median: 9       |                   | NR                       |                          |
|                          | <b>NSCLC</b>                                                                                                        |                    |                 |                   |                          |                          |
| <b>Azzouqa 2019 (31)</b> | Patients with newly diagnosed NSCLC having TTI ≤20 days                                                             | Stage I            | NR              | NR                | Median: 103.4            | NR                       |
|                          | Patients with newly diagnosed NSCLC having TTI >20 days                                                             | Stage I            | NR              | NR                | Median: 63.9             | p<0.0001 vs TTI ≤20 days |
|                          | Patients with newly diagnosed NSCLC having TTI ≤20 days                                                             | Stage II           | NR              | NR                | Median: 72.3             | NR                       |

| Study name                 | Patient population                                      | Stage at diagnosis | Sample size (N) | Time point | Results, months (95% CI) | p-value                  |
|----------------------------|---------------------------------------------------------|--------------------|-----------------|------------|--------------------------|--------------------------|
|                            | Patients with newly diagnosed NSCLC having TTI >20 days | Stage II           | NR              | NR         | Median: 46.8             | p=0.0014 vs TTI ≤20 days |
|                            | Patients with newly diagnosed NSCLC having TTI ≤20 days | Stage III          | NR              | NR         | Median: 30.6             | NR                       |
|                            | Patients with newly diagnosed NSCLC having TTI >20 days | Stage III          | NR              | NR         | Median: 28.5             | p=0.118 vs TTI ≤20 days  |
|                            | Patients with newly diagnosed NSCLC having TTI ≤20 days | Stage IV           | NR              | NR         | Median: 8.3              | NR                       |
|                            | Patients with newly diagnosed NSCLC having TTI >20 days | Stage IV           | NR              | NR         | Median: 12.8             | p<0.0001 vs TTI ≤20 days |
| <b>Cerqueira 2022 (32)</b> | Patients with stages III/IV NSCLC                       | Stages III/IV      | 10,440          | 1-Year     | Median: 20.7             | NR                       |
| <b>Ekman 2019 (33)</b>     | Patients with incident stage I non-squamous NSCLC       | Stage I            | 263             | 2012-2016  | Median: Not reached      | NR                       |
|                            | Patients with incident stage I squamous NSCLC           | Stage I            | 65              | 2012-2016  | Median: 52.8             | NR                       |
|                            | Patients with incident stage II non-squamous NSCLC      | Stage II           | 97              | 2012-2016  | Median: 43.2             | NR                       |
|                            | Patients with incident stage II squamous NSCLC          | Stage II           | 35              | 2012-2016  | Median: 23.6             | NR                       |
|                            | Patients with incident stage IIIA non-squamous NSCLC    | Stage IIIA         | 136             | 2012-2016  | Median: 26.7             | NR                       |

| Study name                  | Patient population                                    | Stage at diagnosis                  | Sample size (N) | Time point | Results, months (95% CI)      | p-value |
|-----------------------------|-------------------------------------------------------|-------------------------------------|-----------------|------------|-------------------------------|---------|
|                             | Patients with incident stage IIIA squamous NSCLC      | Stage IIIA                          | 60              | 2012-2016  | Median: 20.4                  | NR      |
|                             | Patients with incident stage IIIB non-squamous NSCLC  | Stage IIIB                          | 67              | 2012-2016  | Median: 12.5                  | NR      |
|                             | Patients with incident stage IIIB squamous NSCLC      | Stage IIIB                          | 44              | 2012-2016  | Median: 12.9                  | NR      |
|                             | Patients with incident stage IV non-squamous NSCLC    | Stage IV                            | 736             | 2012-2016  | Median: 7.6                   | NR      |
|                             | Patients with incident stage IV non-squamous NSCLC    | Stage IV                            | 123             | 2012-2016  | Median: 6.1                   | NR      |
| <b>Flores 2021 (9)</b>      | Stage I/II                                            | Stage I/II                          | 88,179          | 10 years   | Median: 57 (18–NR*)           | NR      |
|                             | Stage III                                             | Stage III                           | 76,422          |            | Median: 12 (4–34*)            | NR      |
|                             | Stage IV                                              | Stage IV                            | 140,615         |            | Median: 5 (1–13*)             | NR      |
|                             | Missing                                               | Missing                             | 7,166           |            | Median: 10 (2–28*)            | NR      |
| <b>Greystoke 2021 (34)</b>  | Newly diagnosed patients with NSCLC patients: Overall | Adjuvant IB-III A and resected IIIB | 2,670           | NR         | Median: 75.89 (63.54–NA)      | NR      |
|                             |                                                       | Advanced non-resected IIIB          | 4,970           | NR         | Median: 12.48 (11.99–12.94)   | NR      |
|                             |                                                       | Advanced IV                         | 20,470          | NR         | Median: 8.34 (8.21–8.48)      | NR      |
| <b>Jazieh 2021 (61)</b>     | Patients de novo locally advanced stage III NSCLC     | Stage III                           | 2,619           | NR         | Median: 34.9 (32–38.01)       | NR      |
| <b>Klarenbeek 2022 (37)</b> | Stage III                                             | Stage III                           | 5038            | NR         | Median: 22                    | NR      |
|                             | Stage IV                                              | Stage IV                            | 5268            | NR         | Median: 10                    | NR      |
| <b>Luciano 2020 (39)</b>    | Advanced stage (stage III/IV) NSCLC patients          | Stage III/IV                        | NR              | NR         | Median: 6.98 (3.57–13.94*)*** | NR      |

| Study name                | Patient population                                                      | Stage at diagnosis   | Sample size (N) | Time point                                | Results, months (95% CI)      | p-value |
|---------------------------|-------------------------------------------------------------------------|----------------------|-----------------|-------------------------------------------|-------------------------------|---------|
| <b>Martin 2022 (40)</b>   | Overall stage of disease is as per AJCC 7 <sup>th</sup> edition         | Stage III            | 168             | Median follow-up: 660 days (range 7–2404) | Median: 48.6 (34.7–NC)        | NR      |
|                           | Stage IIIA of disease is as per AJCC 7 <sup>th</sup> edition            | Stage IIIA           | 89              |                                           | Median: 52.5 (41.8–70.9)      | NR      |
|                           | Stage IIIB of disease is as per AJCC 7 <sup>th</sup> edition            | Stage IIIB           | 79              |                                           | Median: 23.1 (16.8–52.1)      | NR      |
| <b>Potter 2021 (41)</b>   | Stage I-III NSCLC patients with recorded EGFR test                      | Stage I              | 1,034           | NR                                        | Median: 72 (56.4–NC)          | NR      |
|                           |                                                                         | Stage II             | 560             | NR                                        | Median: 55.5 (45.9–NC)        | NR      |
|                           |                                                                         | Stage III            | 1,527           | NR                                        | Median: 29.5 (27.4–33.6)      | NR      |
| <b>Rittberg 2021 (42)</b> | Patients diagnosed with stage IV NSCLC with treatment era for 2006-2009 | Stage IV             | 3,601           | NR                                        | Median: 3                     | NR      |
|                           | Patients diagnosed with stage IV NSCLC with treatment era for 2010-2013 | Stage IV             | 3,601           | NR                                        | Median: 2.9                   | NR      |
|                           | Patients diagnosed with stage IV NSCLC with treatment era for 2014-2015 | Stage IV             | 3,601           | NR                                        | Median: 2.8                   | p=0.082 |
| <b>Snee 2021 (11)</b>     | Patients diagnosed with NSCLC in 2007-2012                              | Stage I non-squamous | 64              | NR                                        | Median: 55.27 (24.8–98.5*)    | NR      |
|                           | Patients diagnosed with NSCLC in 2013-2017                              |                      | 159             | NR                                        | Median: Not reached (34.2–NR) | NR      |

| Study name | Patient population                                                    | Stage at diagnosis                                         | Sample size (N) | Time point | Results, months (95% CI)   | p-value |
|------------|-----------------------------------------------------------------------|------------------------------------------------------------|-----------------|------------|----------------------------|---------|
|            | Patients diagnosed with NSCLC in 2007-2012                            | Stage I squamous                                           | 58              | NR         | Median: 37.28 (18.5–66.8*) | NR      |
|            | Patients diagnosed with NSCLC in 2013-2017                            |                                                            | 69              | NR         | Median: 51.13 (32.6–NA*)   | NR      |
|            | Patients diagnosed with NSCLC in 2007-2012                            | Stage I NSCLC clinically diagnosed with unknown pathology  | 128             | NR         | Median: 16.72 (5.8–33.1*)  | NR      |
|            | Patients diagnosed with NSCLC in 2013-2017                            |                                                            | 189             | NR         | Median: 20.9 (8.0–40.3*)   | NR      |
|            | Patients diagnosed with NSCLC in 2007-2012                            | Stage II non-squamous                                      | 61              | NR         | Median: 34.27 (10.6–80.0*) | NR      |
|            | Patients diagnosed with NSCLC in 2013-2017                            |                                                            | 51              | NR         | Median: 26.43 (10.2–58.0*) | NR      |
|            | Patients diagnosed with NSCLC in 2007-2012                            | Stage II squamous                                          | 58              | NR         | Median: 17.2 (8.6–58.2*)   | NR      |
|            | Patients diagnosed with NSCLC in 2013-2017                            |                                                            | 74              | NR         | Median: 19.87 (7.2–53.9*)  | NR      |
|            | Patients diagnosed with NSCLC in 2007-2012                            | Stage II NSCLC clinically diagnosed with unknown pathology | 81              | NR         | Median: 8.93 (2.9–16.8*)   | NR      |
|            | Patients diagnosed with NSCLC in 2013-2017                            |                                                            | 55              | NR         | Median: 11.33 (5.4–26.9*)  | NR      |
|            | Stage IIIA, non-squamous (patients diagnosed with NSCLC in 2007-2012) | Stage IIIA, non-squamous                                   | 51              | NR         | Median: 9.93 (6.5–38.6*)   | NR      |

| Study name | Patient population                                                                                                  | Stage at diagnosis          | Sample size (N) | Time point | Results, months (95% CI)  | p-value |
|------------|---------------------------------------------------------------------------------------------------------------------|-----------------------------|-----------------|------------|---------------------------|---------|
|            | Stage IIIA, non-squamous Stage II NSCLC without pathological diagnosis (patients diagnosed with NSCLC in 2013-2017) |                             | 57              | NR         | Median: 23.97 (10.6–NA*)  | NR      |
|            | Patients diagnosed with NSCLC in 2007-2012                                                                          | Stage IIIA, squamous        | 91              | NR         | Median: 10.73 (4.4–21.1*) | NR      |
|            | Patients diagnosed with NSCLC in 2013-2017                                                                          |                             | 72              | NR         | Median: 14.5 (8.4–36.0*)  | NR      |
|            | Stage III NSCLC without pathological diagnosis (patients diagnosed with NSCLC in 2007-2012)                         | Stage III NSCLC             | 77              | NR         | Median: 5.77 (1.5–11.0*)  | NR      |
|            | Stage III NSCLC clinically diagnosed with unknown pathology (patients diagnosed with NSCLC in 2013-2017)            |                             | 57              | NR         | Median: 5 (1.9–7.5*)      | NR      |
|            | Patients diagnosed with NSCLC in 2007-2012                                                                          | Stage IIIB-IV, non-squamous | 345             | NR         | Median: 4.07 (1.3–10.05*) | NR      |
|            | Patients diagnosed with NSCLC in 2013-2017                                                                          |                             | 321             | NR         | Median: 5 (1.7–12.9*)     | NR      |
|            | Patients diagnosed with NSCLC in 2007-2012                                                                          | Stage IIIB-IV, squamous     | 229             | NR         | Median: 5.33 (2.2–12.0*)  | NR      |

| Study name              | Patient population                                                                              | Stage at diagnosis                                              | Sample size (N) | Time point | Results, months (95% CI)                  | p-value |
|-------------------------|-------------------------------------------------------------------------------------------------|-----------------------------------------------------------------|-----------------|------------|-------------------------------------------|---------|
|                         | Patients diagnosed with NSCLC in 2013-2017                                                      |                                                                 | 167             | NR         | Median: 4.8 (2.4–11.9*)                   | NR      |
|                         | Stage IIIB-IV NSCLC without pathological diagnosis (patients diagnosed with NSCLC in 2007-2012) | Stage IIIB-IV NSCLC clinically diagnosed with unknown pathology | 370             | NR         | Median: 1.23 (0.4–3.2*)                   | NR      |
|                         | Stage IIIB-IV NSCLC (patients diagnosed with NSCLC in 2013-2017)                                |                                                                 | 323             | NR         | Median: 1.23 (0.4–3.4*)                   | NR      |
| <b>Soares 2021 (43)</b> | Stage I (diagnosed with NSCLC between 2012-2016)                                                | Stage I                                                         | 174             | NA         | Median: Not reached (29.3 – Not reached*) | NR      |
|                         | Stage II (diagnosed with NSCLC between 2012-2016)                                               | Stage II                                                        | 86              | NA         | Median: 23 (10.2–Not reached*)            | NR      |
|                         | Stage III A (diagnosed with NSCLC between 2012-2016)                                            | Stage III A                                                     | 235             | NA         | Median: 21.7 (9.5–52.7*)                  | NR      |
| <b>Suipte 2019 (44)</b> | Elderly patients (>70 years) diagnosed between 2005-2007                                        | Stage IV                                                        | NR              | NR         | Median: 3.7                               | NR      |
|                         | Elderly patients (>70 years) diagnosed between 2015-2016                                        | Stage IV                                                        | NR              | NR         | Median: 5.3                               | NR      |
|                         | Young patients (<70 years) diagnosed between 2005-2007                                          | Stage IV                                                        | NR              | NR         | Median: 7.8                               | NR      |
|                         | Young patients (<70 years) diagnosed between 2015-2016                                          | Stage IV                                                        | NR              | NR         | Median: 12.1                              | NR      |

| Study name               | Patient population                                                                                           | Stage at diagnosis | Sample size (N) | Time point                    | Results, months (95% CI)   | p-value |
|--------------------------|--------------------------------------------------------------------------------------------------------------|--------------------|-----------------|-------------------------------|----------------------------|---------|
| <b>Van Dao 2022 (46)</b> | Patients de novo locally advanced stage III NSCLC                                                            | Stage III          | 139             | NR                            | Median: 25.7 (19.98–42.61) | NR      |
|                          | Patients de novo locally advanced stage IIIA NSCLC                                                           | Stage IIIA         | 59              | NR                            | Median: 28.2 (24.15–NC)    | NR      |
|                          | Patients de novo locally advanced stage IIIB NSCLC                                                           | Stage IIIB         | 80              | NR                            | Median: 20 (13.01–42.61)   | NR      |
| <b>RCC</b>               |                                                                                                              |                    |                 |                               |                            |         |
| <b>Haas 2022b (48)</b>   | Patients with intermediate-high risk RCC                                                                     | Localized          | NR              | Median follow-up: 49.5 months | Median: 83.4               | NR      |
|                          | Patients with high risk RCC                                                                                  |                    | NR              |                               | Median: 78.4               | NR      |
|                          | Patients without recurrence among intermediate-high risk and high risk RCC                                   |                    | NR              |                               | Median: 93.8               | NR      |
|                          | Patients with recurrence among intermediate-high risk and high risk RCC                                      |                    | NR              |                               | Median: 69.6               | NR      |
| <b>Haas 2022a (47)</b>   | Newly diagnosed, recurrent patients with intermediate-high risk RCC                                          | Localized          | 259             | Median follow-up: 23 months   | Median: 55.68              | NR      |
|                          | Newly diagnosed, recurrent patients with T3G1-G2 RCC (intermediate-high risk RCC subgroup): after recurrence |                    | 101             |                               | Median: 77.64              | NR      |



| Study name                | Patient population                                                                                        | Stage at diagnosis | Sample size (N) | Time point              | Results, months (95% CI) | p-value |
|---------------------------|-----------------------------------------------------------------------------------------------------------|--------------------|-----------------|-------------------------|--------------------------|---------|
|                           | Newly diagnosed, recurrent patients with T3G3 RCC (intermediate-high risk RCC subgroup): after recurrence |                    | 111             |                         | Median: 55.68            | NR      |
|                           | Newly diagnosed, recurrent patients with T3G4 RCC (intermediate-high risk RCC subgroup): after recurrence |                    | 41              |                         | Median: 23.4             | NR      |
| <b>TNBC</b>               |                                                                                                           |                    |                 |                         |                          |         |
| <b>Schwartz 2018 (12)</b> | All AJCC stage III elderly patients                                                                       | Stage III          | 828             | Survival from diagnosis | Median: 30 (27–34)       | NR      |
|                           | Overall (Stage III/IV) elderly patients                                                                   | Stage III and IV   | 1244            | Survival from diagnosis | Median: 18 (16–20)       | NR      |
|                           | All AJCC stage IV elderly patients                                                                        | Stage IV           | 416             | Survival from diagnosis | Median: 5 (4–7)          | NR      |
| <b>Sieluk 2020 (53)</b>   | Patients who initiated systemic neoadjuvant and adjuvant (including chemotherapy and radiation) therapy   | Stage II/III       | 313             | NR                      | Median: 77.6 (55.6–NR)   | NR      |
|                           |                                                                                                           | Stage II           | 165             |                         | Median: 77.6 (77.6–NR)   | NR      |
|                           |                                                                                                           | Stage III          | 148             |                         | Median: 37.8 (27.3–56.1) | NR      |
| <b>Aly 2019a (50)</b>     | Metastatic TNBC - all patients                                                                            | Metastatic         | 625             | Mean: 17.1 months       | Median: 7 (6.2–8.1)      | NR      |

Abbreviations: 1L: First line; 2L: Second line; AJCC: American Joint Committee on Cancer; CI: Confidence interval; IQR: Inter quartile range; NA: Not available; NC: Not calculable; NR: Not reported; NSCLC: Non-small cell lung cancer; RCC: Renal cell carcinoma; SD: Standard deviation; TDT: Time between diagnosis and treatment; TNBC: Triple negative breast cancer; TTI: Time to treatment initiation; UC: Urothelial cancer

## 9 Summary of reported OS rates

## Overall survival rates in patients included in studies

| Study name                  | Patient population                                                                                         | Stage at diagnosis | Sample size (N) | Time point / Variable | Survival rate results                            | p-value |
|-----------------------------|------------------------------------------------------------------------------------------------------------|--------------------|-----------------|-----------------------|--------------------------------------------------|---------|
| <b>Bladder cancer</b>       |                                                                                                            |                    |                 |                       |                                                  |         |
| <b>Amiri 2020 (13)</b>      | Bladder cancer                                                                                             | TNM stage I        | 210             | 5-years               | 67%                                              | <0.001  |
|                             |                                                                                                            | TNM stage II       | 74              |                       | 45%                                              |         |
|                             |                                                                                                            | TNM stage III      | 29              |                       | 15%                                              |         |
|                             |                                                                                                            | Stage I (TNM)      | 210             | NR                    | Mean rate per month: 58.5%;<br>95% CI: 55–62     | NR      |
|                             |                                                                                                            | Stage II (TNM)     | 74              |                       | Mean rate per month: 44.5%;<br>95% CI: 37.2–51.7 |         |
|                             |                                                                                                            | Stage III (TNM)    | 29              |                       | Mean rate per month: 21.7%;<br>95% CI: 12.9–30.4 |         |
|                             |                                                                                                            | Stage IV (TNM)     | 8               |                       | Mean rate per month: 21.3%;<br>95% CI: 8.9–33.6  |         |
| <b>Fisher 2018 (1)</b>      | Overall (The time origin was the start of therapy within 1L or 2L for those who did not receive treatment) | Stage IV           | 502             | From start of 1L      | n (%): 425 (84.7); 95% CI: 7.5–9.6               | NR      |
|                             |                                                                                                            | Stage IV           | 265             | From start of 2L      | n (%): 236 (89.1); 95% CI: 3.6–5.0               | NR      |
|                             | Overall – Treated (The time origin was the start of therapy within 1L or 2L)                               | Stage IV           | 321             | From start of 1L      | n (%): 263 (81.9); 95% CI: 9.7–12.2              | NR      |
|                             |                                                                                                            | Stage IV           | 147             | From start of 2L      | n (%): 130 (88.4); 95% CI: 4.5–6.5               | NR      |
| <b>Sorup 2021 (17)</b>      | Patients with incident urothelial cancer                                                                   | Stage IV           | 620             | 1-year                | 40.4%; 95% CI: 36.4–44.4                         | NR      |
|                             |                                                                                                            | Stage IV           | 620             | 2-year                | 23.6%; 95% CI: 20.1–27.4                         | NR      |
| <b>Head and neck cancer</b> |                                                                                                            |                    |                 |                       |                                                  |         |
| <b>Ho 2019 (2)</b>          | Oral cavity cancer                                                                                         | Stage 0            | 275             | 3-year                | 90.8%                                            | NR      |
|                             |                                                                                                            | Stage I            | 10,383          |                       | 88%                                              | NR      |
|                             |                                                                                                            | Stage II           | 6627            |                       | 79.8%                                            | NR      |
|                             |                                                                                                            | Stage III          | 3954            |                       | 79.8%                                            | NR      |
|                             |                                                                                                            | Stage IV           | 13,134          |                       | 45.4%                                            | NR      |
|                             |                                                                                                            | Stage 0            | 275             | 5-year                | 83.9%                                            | NR      |
|                             |                                                                                                            | Stage I            | 10,383          |                       | 82.1%                                            | NR      |

| Study name     | Patient population | Stage at diagnosis | Sample size (N) | Time point / Variable | Survival rate results | p-value              |
|----------------|--------------------|--------------------|-----------------|-----------------------|-----------------------|----------------------|
|                |                    | Stage II           | 6627            |                       | 72.7%                 | NR                   |
|                |                    | Stage III          | 3954            |                       | 72.7%                 | NR                   |
|                |                    | Stage IV           | 13,134          |                       | 38%                   | NR                   |
|                |                    | Stage 0            | 275             |                       | 97.1%                 | NR                   |
|                |                    | Stage I            | 10,383          |                       | 92.3%                 | NR                   |
|                |                    | Stage II           | 6627            |                       | 84.9%                 | NR                   |
|                |                    | Stage III          | 3954            |                       | 74.6%                 | NR                   |
|                |                    | Stage IV           | 13,134          |                       | 52.1%                 | NR                   |
|                |                    | Stage 0            | 275             | 3-year                | 94.5%                 | NR                   |
|                |                    | Stage I            | 10,383          |                       | 89.0%                 | NR                   |
|                |                    | Stage II           | 6627            |                       | 80.4%                 | NR                   |
|                |                    | Stage III          | 3954            |                       | 68.3%                 | NR                   |
|                |                    | Stage IV           | 13,134          |                       | 45.9%                 | NR                   |
|                |                    | Stage 0            | 275             | 5-year                | 90.8%                 | NR                   |
|                |                    | Stage I            | 10,383          |                       | 88%                   | NR                   |
|                |                    | Stage II           | 6627            |                       | 79.8%                 | NR                   |
|                |                    | Stage III          | 3954            |                       | 79.8%                 | NR                   |
|                |                    | Stage IV           | 13,134          |                       | 45.4%                 | NR                   |
| Neto 2021 (22) | Oropharynx cancer  | Stage I            | 17              | 1-year                | 100.0                 | NR                   |
|                |                    | Stage II           | 29              | 1-year                | 89.1                  | NR                   |
|                |                    | Stage III          | 54              | 1-year                | 94.3                  | NR                   |
|                |                    | Stage IV A         | 319             | 1-year                | 92.0                  | NR                   |
|                |                    | Stage IV B         | 19              | 1-year                | 94.1                  | NR                   |
|                |                    | Stage IV C         | 25              | 1-year                | 59.4                  | NR                   |
|                |                    | Stage I            | 17              | 3-year                | 93.3                  | NR                   |
|                |                    | Stage II           | 29              | 3-year                | 85.4                  | NR                   |
|                |                    | Stage III          | 54              | 3-year                | 90.2                  | NR                   |
|                |                    | Stage IV A         | 319             | 3-year                | 81.6                  | NR                   |
|                |                    | Stage IV B         | 19              | 3-year                | 60.1                  | NR                   |
|                |                    | Stage IV C         | 25              | 3-year                | 50.9                  | p <0.001 vs. stage I |
|                |                    | Stage I            | 279             | 1-year                | 93.4                  | NR                   |
|                |                    | Stage II           | 94              | 1-year                | 91.4                  | NR                   |

| Study name                | Patient population        | Stage at diagnosis     | Sample size (N) | Time point / Variable                                 | Survival rate results | p-value              |    |
|---------------------------|---------------------------|------------------------|-----------------|-------------------------------------------------------|-----------------------|----------------------|----|
|                           |                           | Stage III              | 65              | 1-year                                                | 90.2                  | NR                   |    |
|                           |                           | Stage IV               | 25              | 1-year                                                | 59.4                  | NR                   |    |
|                           |                           | Stage I                | 279             | 3-year                                                | 85.7                  | NR                   |    |
|                           |                           | Stage II               | 94              | 3-year                                                | 80.5                  | NR                   |    |
|                           |                           | Stage III              | 65              | 3-year                                                | 71.5                  | NR                   |    |
|                           |                           | Stage IV               | 25              | 3-year                                                | 50.9                  | p <0.001 vs. stage I |    |
| <b>Sargeran 2009 (24)</b> | Overall Lip cancer        | Overall                | 82              | 1-Year                                                | 91%                   | NR                   |    |
|                           |                           |                        | 82              | 2-Year                                                | 86%                   | NR                   |    |
|                           |                           |                        | 82              | 5-year                                                | 62%                   | NR                   |    |
|                           | Early-stage Lip cancer    | Stage I at diagnosis   | 35              | 1-Year                                                | 97%                   | p<0.001 vs. stage IV |    |
|                           |                           |                        | 35              | 2-Year                                                | 91%                   |                      |    |
|                           |                           |                        | 35              | 5-year                                                | 81%                   |                      |    |
|                           |                           | Stage II at diagnosis  | 17              | 1-Year                                                | 93%                   |                      |    |
|                           |                           |                        | 17              | 2-Year                                                | 87%                   |                      |    |
|                           |                           |                        | 17              | 5-year                                                | 75%                   |                      |    |
|                           | Advanced stage Lip cancer | Stage III at diagnosis | 11              | 1-Year                                                | 81%                   |                      |    |
|                           |                           |                        | 11              | 2-Year                                                | 73%                   |                      |    |
|                           |                           |                        | 11              | 5-year                                                | 45%                   |                      |    |
| Stage IV at diagnosis     |                           | 9                      | 1-Year          | 67%                                                   |                       |                      |    |
| <b>Sargeran 2008 (23)</b> | Oral cancer               | Overall                | 470             | The mean (SD) follow-up: 32 months (26), range 0–116. | n (%): 80 (17)        |                      | NR |
|                           |                           | Overall                | 470             | 1-Year                                                | 77%                   |                      | NR |
|                           |                           | Overall                | 470             | 2-Year                                                | 57%                   | NR                   |    |
|                           |                           | Overall                | 470             | 5-year                                                | 30%                   | NR                   |    |
|                           |                           | Stage I                | 92              | 1-Year                                                | 93%                   | NR                   |    |
|                           |                           | Stage I                | 92              | 2-Year                                                | 80%                   | NR                   |    |
|                           |                           | Stage I                | 92              | 5-year                                                | 51%                   | NR                   |    |
|                           |                           | Stage II               | 73              | 1-Year                                                | 91%                   | NR                   |    |
|                           |                           | Stage II               | 73              | 2-Year                                                | 80%                   | NR                   |    |

| Study name                     | Patient population                                                          | Stage at diagnosis      | Sample size (N) | Time point / Variable | Survival rate results            | p-value |
|--------------------------------|-----------------------------------------------------------------------------|-------------------------|-----------------|-----------------------|----------------------------------|---------|
|                                |                                                                             | Stage II                | 73              | 5-year                | 44%                              | NR      |
|                                |                                                                             | Stage III               | 70              | 1-Year                | 77%                              | NR      |
|                                |                                                                             | Stage III               | 70              | 2-Year                | 50%                              | NR      |
|                                |                                                                             | Stage III               | 70              | 5-year                | 13%                              | NR      |
|                                |                                                                             | Stage IV                | 167             | 1-Year                | 45%                              | NR      |
|                                |                                                                             | Stage IV                | 167             | 2-Year                | 22%                              | NR      |
|                                |                                                                             | Stage IV                | 167             | 5-year                | 12%                              | NR      |
| <b>Melanoma</b>                |                                                                             |                         |                 |                       |                                  |         |
| <b>Ramond 2021 (26)</b>        | All patients with melanoma                                                  | Stage I, II, III and IV | 184,864         | 1 year                | 94%                              | NR      |
|                                | Patients with stage I melanoma                                              | Stage I                 | NR              | 1 year                | 99%                              | NR      |
|                                | Patients with stage II melanoma                                             | Stage II                | NR              | 1 year                | 94%                              | NR      |
|                                | Patients with stage III melanoma                                            | Stage III               | NR              | 1 year                | 90%                              | NR      |
|                                | Patients with stage IV melanoma                                             | Stage IV                | NR              | 1 year                | 48%                              | NR      |
|                                | All patients with melanoma (Relative survival) <sup>a</sup>                 | Stage I, II, III and IV | 184,864         | 1 year                | 97%                              | NR      |
| <b>Song 2015 (4)</b>           | Stage IIIB/C at diagnosis                                                   | Stage IIIB/C            | 74              | 1-year                | 67.20%                           | NR      |
|                                | Stage IV M1A at diagnosis                                                   | Stage M1A               | 212             | 1-year                | 64.50%                           | NR      |
|                                | Stage IV M1B at diagnosis                                                   | Stage M1B               | 292             | 1-year                | 43.80%                           | NR      |
|                                | Stage IV M1C at diagnosis                                                   | Stage M1C               | 1104            | 1-year                | 22.30%                           | NR      |
|                                | Stage IIIB/C at diagnosis                                                   | Stage IIIB/C            | 74              | 2-year                | 42.90%                           | NR      |
|                                | Stage IV M1A at diagnosis                                                   | Stage M1A               | 212             | 2-year                | 40.40%                           | NR      |
|                                | Stage IV M1B at diagnosis                                                   | Stage M1B               | 292             | 2-year                | 23.40%                           | NR      |
|                                | Stage IV M1C at diagnosis                                                   | Stage M1C               | 1104            | 2-year                | 8.90%                            | NR      |
|                                | Stage IIIB/C at diagnosis                                                   | Stage IIIB/C            | 74              | 3-year                | 32.10%                           | NR      |
|                                | Stage IV M1A at diagnosis                                                   | Stage M1A               | 212             | 3-year                | 26.40%                           | NR      |
|                                | Stage IV M1B at diagnosis                                                   | Stage M1B               | 292             | 3-year                | 13.80%                           | NR      |
|                                | Stage IV M1C at diagnosis                                                   | Stage M1C               | 1104            | 3-year                | 4.70%                            | NR      |
| <b>Tjokrowidjaja 2021 (27)</b> | Survivor function for AJCC 7th edition among pathologically staged patients | Stage IA                | 26,944          | 3-Year                | n (%): 10627 (97); 95% CI: 96–97 | NR      |
|                                |                                                                             | Stage IA                | 26,944          | 5-Year                | n (%): 2806 (94); 95% CI: 94–95  | NR      |
|                                |                                                                             | Stage IB                | 18,507          | 3-Year                | n (%): 7715 (95); 95% CI: 94–95  | NR      |
|                                |                                                                             | Stage IB                | 18,507          | 5-Year                | n (%): 2116 (90); 95% CI: 90–91  | NR      |
|                                |                                                                             | Stage IIA               | 4117            | 3-Year                | n (%): 1600 (87); 95% CI: 86–88  | NR      |
|                                |                                                                             | Stage IIA               | 4117            | 5-Year                | n (%): 432 (78); 95% CI: 75–80   | NR      |

| Study name             | Patient population                                                          | Stage at diagnosis | Sample size (N)                | Time point / Variable        | Survival rate results            | p-value |
|------------------------|-----------------------------------------------------------------------------|--------------------|--------------------------------|------------------------------|----------------------------------|---------|
|                        |                                                                             | Stage IIB          | 2829                           | 3-Year                       | n (%): 937 (76); 95% CI: 74–78   | NR      |
|                        |                                                                             | Stage IIB          | 2829                           | 5-Year                       | n (%): 242 (64); 95% CI: 61–66   | NR      |
|                        |                                                                             | Stage IIC          | 1441                           | 3-Year                       | n (%): 335 (57); 95% CI: 54–60   | NR      |
|                        |                                                                             | Stage IIC          | 1441                           | 5-Year                       | n (%): 74 (39); 95% CI: 35–44    | NR      |
|                        |                                                                             | Stage IIIA         | 1160                           | 3-Year                       | n (%): 438 (86); 95% CI: 83–89   | NR      |
|                        |                                                                             | Stage IIIA         | 1160                           | 5-Year                       | n (%): 140 (79); 95% CI: 75–82   | NR      |
|                        |                                                                             | Stage IIIB         | 1463                           | 3-Year                       | n (%): 446 (69); 95% CI: 66–72   | NR      |
|                        |                                                                             | Stage IIIB         | 1463                           | 5-Year                       | n (%): 98 (57); 95% CI: 52–61    | NR      |
|                        |                                                                             | Stage IIIC         | 925                            | 3-Year                       | n (%): 194 (50); 95% CI: 46–54   | NR      |
|                        |                                                                             | Stage IIIC         | 925                            | 5-Year                       | n (%): 35 (38); 95% CI: 33–43    | NR      |
|                        |                                                                             | Stage IV           | 2603                           | 3-Year                       | n (%): 247 (24); 95% CI: 22–26   | NR      |
|                        |                                                                             | Stage IV           | 2603                           | 5-Year                       | n (%): 61 (20); 95% CI: 18–22    | NR      |
|                        | Survivor function for AJCC 8th edition among pathologically staged patients | Stage IA           | 38,344                         | 3-Year                       | n (%): 15333 (96); 95% CI: 96–96 | NR      |
|                        |                                                                             | Stage IA           | 38,344                         | 5-Year                       | n (%): 4074 (93); 95% CI: 93–94  | NR      |
|                        |                                                                             | Stage IB           | 7099                           | 3-Year                       | n (%): 3008 (94); 95% CI: 93–95  | NR      |
|                        |                                                                             | Stage IB           | 7099                           | 5-Year                       | n (%): 848 (89); 95% CI: 88–90   | NR      |
|                        |                                                                             | Stage IIA          | 4116                           | 3-Year                       | n (%): 1600 (87); 95% CI: 86–88  | NR      |
|                        |                                                                             | Stage IIA          | 4116                           | 5-Year                       | n (%): 432 (78); 95% CI: 75–80   | NR      |
|                        |                                                                             | Stage IIB          | 2833                           | 3-Year                       | n (%): 937 (76); 95% CI: 74–78   | NR      |
|                        |                                                                             | Stage IIB          | 2833                           | 5-Year                       | n (%): 242 (64); 95% CI: 61–66   | NR      |
|                        |                                                                             | Stage IIC          | 1445                           | 3-Year                       | n (%): 335 (57); 95% CI: 54–60   | NR      |
|                        |                                                                             | Stage IIC          | 1445                           | 5-Year                       | n (%): 74 (39); 95% CI: 34–44    | NR      |
|                        |                                                                             | Stage IIIA         | 855                            | 3-Year                       | n (%): 333 (87); 95% CI: 84–90   | NR      |
|                        |                                                                             | Stage IIIA         | 855                            | 5-Year                       | n (%): 100 (82); 95% CI: 78–85   | NR      |
|                        |                                                                             | Stage IIIB         | 909                            | 3-Year                       | n (%): 306 (81); 95% CI: 78–84   | NR      |
|                        |                                                                             | Stage IIIB         | 909                            | 5-Year                       | n (%): 79 (69); 95% CI: 64–74    | NR      |
|                        |                                                                             | Stage IIIC         | 1730                           | 3-Year                       | n (%): 430 (56); 95% CI: 53–59   | NR      |
|                        |                                                                             | Stage IIIC         | 1730                           | 5-Year                       | n (%): 94 (44); 95% CI: 40–48    | NR      |
|                        |                                                                             | Stage IIID         | 54                             | 3-Year                       | n (%): 10 (30); 95% CI: 17–45    | NR      |
|                        |                                                                             | Stage IIID         | 54                             | 5-Year                       | n (%): 0 (0)                     | NR      |
| Stage IV               | 2604                                                                        | 3-Year             | n (%): 247 (24); 95% CI: 22–26 | NR                           |                                  |         |
| Stage IV               | 2604                                                                        | 5-Year             | n (%): 61 (20); 95% CI: 18–22  | NR                           |                                  |         |
| <b>Wilson 2019 (6)</b> | Overall                                                                     | NA                 | 304                            | Median (post metastasis): 25 | n (%): 75 (24.7)                 | NR      |

| Study name                           | Patient population                               | Stage at diagnosis                        | Sample size (N) | Time point / Variable                                    | Survival rate results         | p-value |
|--------------------------------------|--------------------------------------------------|-------------------------------------------|-----------------|----------------------------------------------------------|-------------------------------|---------|
|                                      |                                                  |                                           |                 | (range: 0.5 to 167.8) months                             |                               |         |
|                                      | Stage I at diagnosis (clinically stage AJCC 7)   | Stage I                                   | 96              | Median (post metastasis): 22 (range: 5.1–155.8) months   | n (%): 29 (30.2)              | NR      |
|                                      | Stage II at diagnosis (clinically stage AJCC 7)  | Stage II                                  | 99              | Median (post metastasis): 37.5 (range: 5.5–141.3) months | n (%): 23 (23.2)              | NR      |
|                                      | Stage III at diagnosis (clinically stage AJCC 7) | Stage III                                 | 109             | Median (post metastasis): 27.7 (range: 0.5–167.8) months | n (%): 23 (23.2)              | NR      |
| <b>Winge-Main 2020 (28)</b>          | Patients with cutaneous melanoma                 | Stage IIB                                 | 4,339           | 3-year                                                   | 74.50%                        | NR      |
|                                      |                                                  | Stage IIC                                 | 4,339           | 3-year                                                   | 48.70%                        | NR      |
|                                      |                                                  | Stage IIIA                                | 4,339           | 3-year                                                   | 91.50%                        | NR      |
|                                      |                                                  | Stage IIIB                                | 4,339           | 3-year                                                   | 76.70%                        | NR      |
|                                      |                                                  | Stage IIIC                                | 4,339           | 3-year                                                   | 63.10%                        | NR      |
|                                      |                                                  | Stage IIID                                | 4,339           | 3-year                                                   | 55.40%                        | NR      |
|                                      |                                                  | Stage IV                                  | 4,339           | 3-year                                                   | 63.70%                        | NR      |
| <b>NSCLC</b>                         |                                                  |                                           |                 |                                                          |                               |         |
| <b>Abrão 2021 (29)</b>               | Stage I                                          | Stage I                                   | 853             | 5-year                                                   | n (%): 755 (45.6)             | NR      |
|                                      | Stage II                                         | Stage II                                  | 425             | 5-year                                                   | n (%): 387 (27.5)             | <0.001  |
| <b>Abrão 2022 (30)</b>               | Stage I/II                                       | Early stage                               | 681             | NR                                                       | 3-years: 68.8% 5-years: 58.1% | NR      |
| <b>Berglund 2012<sup>b</sup> (7)</b> | Socioeconomic quintile-Q1 (affluent)             | Early stage (Stages IA-IIIB at diagnosis) | 1828            | 3-year (cumulative data)                                 | 50%                           | NR      |
|                                      | Socioeconomic quintile-Q5 (deprived)             |                                           |                 |                                                          | 39%                           | NR      |
| <b>Cerqueira 2022 (32)</b>           | Patients with stages III/IV NSCLC                | Stages III/IV                             | 10,440          | 1-Year                                                   | 57.1%                         | NR      |
| <b>Ehrenstein 2022 (8)</b>           | EGFR mutation status negative                    | Stage IIA                                 | 188             | 6-Year                                                   | n (%): <5 (NR)                | NR      |
|                                      | EGFR mutation status-Positive                    | Stage IB                                  | 81              | 6-Year                                                   | n (%): <5 (NR)                | NR      |
|                                      |                                                  | Stage IIA                                 | 9               | 4-Year                                                   | n (%): <5 (NR)                | NR      |
|                                      |                                                  | Stage IIA                                 | 9               | 5-Year                                                   | n (%): <5 (NR)                | NR      |
|                                      |                                                  | Stage IIB                                 | 43              | 5-Year                                                   | n (%): <5 (NR)                | NR      |

| Study name                          | Patient population                                          | Stage at diagnosis     | Sample size (N) | Time point / Variable  | Survival rate results                               | p-value           |
|-------------------------------------|-------------------------------------------------------------|------------------------|-----------------|------------------------|-----------------------------------------------------|-------------------|
|                                     |                                                             | Stage IIB              | 43              | 6-Year                 | n (%): <5 (NR)                                      | NR                |
|                                     |                                                             | Stage IIIA             | 62              | 5-Year                 | n (%): <5 (NR)                                      | NR                |
|                                     |                                                             | Stage IIIA             | 62              | 6-Year                 | n (%): <5 (NR)                                      | NR                |
| <b>Kalilani 2022 (36)</b>           | Patients identified from SEER database                      | Stage III              | 49,298          | 1 year                 | 55.1%                                               | NR                |
|                                     |                                                             |                        | 49,298          | 3 years                | 26.3%                                               | NR                |
|                                     |                                                             |                        | 49,298          | 5 years                | 17.5%                                               | NR                |
|                                     |                                                             | Stage IV               | 133,395         | 1 year                 | 25.8%                                               | NR                |
|                                     |                                                             |                        | 133,395         | 3 years                | 7.4%                                                | NR                |
|                                     |                                                             |                        | 133,395         | 5 years                | 4%                                                  | NR                |
|                                     | Patients identified from Flatiron database                  | Stage III              | 1,175           | 1 year                 | 72.5%                                               | NR                |
|                                     |                                                             |                        | 1,175           | 3 years                | 36.4%                                               | NR                |
|                                     |                                                             | Stage IV               | 3,210           | 1 year                 | 65.9%                                               | NR                |
|                                     |                                                             |                        | 3,210           | 3 years                | 24.6%                                               | NR                |
| <b>Klarenbeek 2022 (37)</b>         | Stage III                                                   | Stage III              | NR              | 1-year, 3-year, 5-year | n (%): NR (1-year: 71%, 3-year: 37%, 5-year: 25%);  | NR                |
|                                     | Stage IV                                                    | Stage III              | 5268            |                        | n (%): NR (1-year: 44%, 3-year: 16%, 5-year: 9%);   | NR                |
| <b>Komiya 2020 (38)</b>             | Patients with unresectable stage III NSCLC with T0 status   | Unresectable stage III | 458             | 5-year                 | 30.5%                                               | <0.0001           |
|                                     | Patients with unresectable stage III NSCLC with T1-4 status |                        | 84,263          | 5-year                 | 12.7%                                               | NR                |
|                                     | Patients with unresectable stage III NSCLC with T0 status   |                        | 458             | 5-year                 | 35.3%                                               | NR                |
|                                     | Patients with unresectable stage III NSCLC with T1-4 status |                        | 84,263          | 5-year                 | 13.5%                                               | NR                |
| <b>Monteiro 2022 (10)</b>           | Stage I                                                     | Stage I                | 50              | 5 years OS             | 68.9%; 95% CI: 53.5–80.0                            | 0.001             |
|                                     | Stage II                                                    | Stage II               | 26              | 5 years OS             | 61%; 95% CI: 39.6–76.9                              | NR                |
|                                     | Stage IIIA                                                  | Stage IIIA             | 15              | 5 years OS             | 25%; 95% CI: 6.9–48.8                               | NR                |
| <b>Potter 2022<sup>c</sup> (41)</b> | Patients with stage I NSCLC                                 | Stage I                | NR              | 5-year                 | 59.5%; 95% CI: 59.3% to 59.7%                       | NR                |
|                                     | Patients with unknown stage NSCLC                           | Unknown                | NR              | 5-year                 | 34.1%; 95% CI: 33.8% to 34.5%                       | <0.001 vs stage I |
|                                     | Patients in low screening state                             | Stage I                | NR              | 2010 to 2017           | Annual percent change: 5.9%                         | NR                |
|                                     | Patients in high screening state                            | Stage I                | NR              | 2010 to 2014           | Annual percent change: 2.2%; 95% CI: -4.7% to 9.7%; | 0.39              |



| Study name                | Patient population                         | Stage at diagnosis                                        | Sample size (N) | Time point / Variable | Survival rate results                                  | p-value |
|---------------------------|--------------------------------------------|-----------------------------------------------------------|-----------------|-----------------------|--------------------------------------------------------|---------|
|                           | Patients in high screening state           | Stage I                                                   | NR              | 2014 to 2017          | Annual percent change: 13.4%;<br>95% CI: 1.4% to 26.9% | 0.04    |
| <b>Snee 2021<br/>(11)</b> | Patients diagnosed with NSCLC in 2007-2012 | Stage I non-squamous                                      | 58              | 1-year                | 91%; 95% CI: 84–98                                     | NR      |
|                           | Patients diagnosed with NSCLC in 2013-2017 |                                                           | 123             | 1-year                | 90%; 95% CI: 86–95                                     | NR      |
|                           | Patients diagnosed with NSCLC in 2007-2012 |                                                           | 37              | 3-year                | 58%; 95% CI: 47–71                                     | NR      |
|                           | Patients diagnosed with NSCLC in 2013-2017 |                                                           | 44              | 3-year                | 72%; 95% CI: 64–81                                     | NR      |
|                           | Patients diagnosed with NSCLC in 2007-2012 |                                                           | 25              | 5-year                | 43%; 95% CI: 32–57                                     | NR      |
|                           | Patients diagnosed with NSCLC in 2013-2017 |                                                           | <6              | 5-year                | 51%; 95% CI: 37–72                                     | NR      |
|                           | Patients diagnosed with NSCLC in 2007-2012 | Stage I squamous                                          | 46              | 1-year                | 79%; 95% CI: 70–90                                     | NR      |
|                           | Patients diagnosed with NSCLC in 2013-2017 |                                                           | 55              | 1-year                | 85%; 95% CI: 77–94                                     | NR      |
|                           | Patients diagnosed with NSCLC in 2007-2012 |                                                           | 29              | 3-year                | 5%; 95% CI: 39–65                                      | NR      |
|                           | Patients diagnosed with NSCLC in 2013-2017 |                                                           | 24              | 3-year                | 73%; 95% CI: 61–86                                     | NR      |
|                           | Patients diagnosed with NSCLC in 2007-2012 |                                                           | 16              | 5-year                | 28%; 95% CI: 18–42                                     | NR      |
|                           | Patients diagnosed with NSCLC in 2013-2017 |                                                           | <6              | 5-year                | 32%; 95% CI: 13–81                                     | NR      |
|                           | Patients diagnosed with NSCLC in 2007-2012 | Stage I NSCLC clinically diagnosed with unknown pathology | 76              | 1-year                | 59%; 95% CI: 51–69                                     | NR      |
|                           | Patients diagnosed with NSCLC in 2013-2017 |                                                           | 97              | 1-year                | 66%; 95% CI: 60–74                                     | NR      |
|                           | Patients diagnosed with NSCLC in 2007-2012 |                                                           | 25              | 3-year                | 20%; 95% CI: 14–28                                     | NR      |
|                           | Patients diagnosed with NSCLC in 2013-2017 |                                                           | 17              | 3-year                | 27%; 95% CI: 19–38                                     | NR      |
|                           | Patients diagnosed with NSCLC in 2007-2012 |                                                           | 11              | 5-year                | 9%; 95% CI: 05–16                                      | NR      |

| Study name | Patient population                         | Stage at diagnosis                                         | Sample size (N)   | Time point / Variable | Survival rate results | p-value             |
|------------|--------------------------------------------|------------------------------------------------------------|-------------------|-----------------------|-----------------------|---------------------|
|            | Patients diagnosed with NSCLC in 2013-2017 |                                                            | <6                | 5-year                | 10%; 95% CI: 04–28    | NR                  |
|            | Patients diagnosed with NSCLC in 2007-2012 | Stage II non-squamous                                      | 41                | 1-year                | 68%; 95% CI: 58–81    | NR                  |
|            | Patients diagnosed with NSCLC in 2013-2017 |                                                            | 30                | 1-year                | 72%; 95% CI: 60–85    | NR                  |
|            | Patients diagnosed with NSCLC in 2007-2012 |                                                            | 27                | 3-year                | 45%; 95% CI: 34–60    | NR                  |
|            | Patients diagnosed with NSCLC in 2013-2017 |                                                            | 12                | 3-year                | 42%; 95% CI: 30–61    | NR                  |
|            | Patients diagnosed with NSCLC in 2007-2012 |                                                            | 18                | 5-year                | 31%; 95% CI: 21–46    | NR                  |
|            | Patients diagnosed with NSCLC in 2013-2017 |                                                            | 0                 | 5-year                | 0%; 95% CI: NA        | NR                  |
|            | Patients diagnosed with NSCLC in 2007-2012 |                                                            | Stage II squamous | 36                    | 1-year                | 62%; 95% CI: 51–76  |
|            | Patients diagnosed with NSCLC in 2013-2017 | 45                                                         |                   | 1-year                | 66%; 95% CI: 55–.77   | NR                  |
|            | Patients diagnosed with NSCLC in 2007-2012 | 18                                                         |                   | 3-year                | 31%; 95% CI: 21–46    | NR                  |
|            | Patients diagnosed with NSCLC in 2013-2017 | 15                                                         |                   | 3-year                | 42%; 95% CI: 31–57    | NR                  |
|            | Patients diagnosed with NSCLC in 2007-2012 | 14                                                         |                   | 5-year                | 24%; 95% CI: 15–38    | NR                  |
|            | Patients diagnosed with NSCLC in 2013-2017 | 0                                                          |                   | 5-year                | 0%; 95% CI: NA        | NR                  |
|            | Patients diagnosed with NSCLC in 2007-2012 | Stage II NSCLC clinically diagnosed with unknown pathology |                   | 27                    | 1-year                | 33%; 95% CI: 24–.45 |
|            | Patients diagnosed with NSCLC in 2013-2017 |                                                            | 25                | 1-year                | 50%; 95% CI: 38–65    | NR                  |
|            | Patients diagnosed with NSCLC in 2007-2012 |                                                            | 11                | 3-year                | 14%; 95% CI: 08–24    | NR                  |
|            | Patients diagnosed with NSCLC in 2013-2017 |                                                            | <6                | 3-year                | 9%; 95% CI: 03–31     | NR                  |
|            | Patients diagnosed with NSCLC in 2007-2012 |                                                            | 7                 | 5-year                | 9%; 95% CI: 04–18     | NR                  |

| Study name | Patient population                         | Stage at diagnosis                                                     | Sample size (N)      | Time point / Variable | Survival rate results | p-value            |
|------------|--------------------------------------------|------------------------------------------------------------------------|----------------------|-----------------------|-----------------------|--------------------|
|            | Patients diagnosed with NSCLC in 2013-2017 |                                                                        | 0                    | 5-year                | 0%; 95% CI: NA        | NR                 |
|            | Patients diagnosed with NSCLC in 2007-2012 | Stage IIIA, non-squamous Stage II NSCLC without pathological diagnosis | 23                   | 1-year                | 45%; 95% CI: 33–61    | NR                 |
|            | Patients diagnosed with NSCLC in 2013-2017 |                                                                        | 35                   | 1-year                | 74%; 95% CI: 63–87    | NR                 |
|            | Patients diagnosed with NSCLC in 2007-2012 |                                                                        | 14                   | 3-year                | 27%; 95% CI: 18–43    | NR                 |
|            | Patients diagnosed with NSCLC in 2013-2017 |                                                                        | <6                   | 3-year                | 35%; 95% CI: 22–58    | NR                 |
|            | Patients diagnosed with NSCLC in 2007-2012 |                                                                        | 9                    | 5-year                | 18%; 95% CI: 10–32    | NR                 |
|            | Patients diagnosed with NSCLC in 2013-2017 |                                                                        | 0                    | 5-year                | 0%; 95% CI: NA        | NR                 |
|            | Patients diagnosed with NSCLC in 2007-2012 |                                                                        | Stage IIIA, squamous | 41                    | 1-year                | 45%; 95% CI: 36–57 |
|            | Patients diagnosed with NSCLC in 2013-2017 | 29                                                                     |                      | 1-year                | 54%; 95% CI: 43–68    | NR                 |
|            | Patients diagnosed with NSCLC in 2007-2012 | 12                                                                     |                      | 3-year                | 13%; 95% CI: 08–22    | NR                 |
|            | Patients diagnosed with NSCLC in 2013-2017 | <6                                                                     |                      | 3-year                | 21%; 95% CI: 10–42    | NR                 |
|            | Patients diagnosed with NSCLC in 2007-2012 | 10                                                                     |                      | 5-year                | 11%; 95% CI: 06–20    | NR                 |
|            | Patients diagnosed with NSCLC in 2013-2017 | 0                                                                      |                      | 5-year                | 0%; 95% CI: NA        | NR                 |
|            | Patients diagnosed with NSCLC in 2007-2012 | Stage III NSCLC clinically diagnosed with unknown pathology            |                      | 16                    | 1-year                | 21%; 95% CI: 13–32 |
|            | Patients diagnosed with NSCLC in 2013-2017 |                                                                        | 7                    | 1-year                | 20%; 95% CI: 12–36    | NR                 |
|            | Patients diagnosed with NSCLC in 2007-2012 |                                                                        | <6                   | 3-year                | 05%; 95% CI: 02–13    | NR                 |
|            | Patients diagnosed with NSCLC in 2013-2017 |                                                                        | 0                    | 3-year                | 0%; 95% CI: NA        | NR                 |
|            | Patients diagnosed with NSCLC in 2007-2012 |                                                                        | 0                    | 5-year                | 0%; 95% CI: NA        | NR                 |

| Study name | Patient population                         | Stage at diagnosis                                              | Sample size (N)         | Time point / Variable | Survival rate results | p-value            |
|------------|--------------------------------------------|-----------------------------------------------------------------|-------------------------|-----------------------|-----------------------|--------------------|
|            | Patients diagnosed with NSCLC in 2013-2017 |                                                                 | 0                       | 5-year                | 0%; 95% CI: NA        | NR                 |
|            | Patients diagnosed with NSCLC in 2007-2012 | Stage IIIB-IV, non-squamous                                     | 68                      | 1-year                | 20%; 95% CI: 16–25    | NR                 |
|            | Patients diagnosed with NSCLC in 2013-2017 |                                                                 | 72                      | 1-year                | 26%; 95% CI: 21–31    | NR                 |
|            | Patients diagnosed with NSCLC in 2007-2012 |                                                                 | 19                      | 3-year                | 06%; 95% CI: 04–09    | NR                 |
|            | Patients diagnosed with NSCLC in 2013-2017 |                                                                 | 8                       | 3-year                | 06%; 95% CI: 04–11    | NR                 |
|            | Patients diagnosed with NSCLC in 2007-2012 |                                                                 | 11                      | 5-year                | 03%; 95% CI: 02–07    | NR                 |
|            | Patients diagnosed with NSCLC in 2013-2017 |                                                                 | 0                       | 5-year                | 0%; 95% CI: NA        | NR                 |
|            | Patients diagnosed with NSCLC in 2007-2012 |                                                                 | Stage IIIB-IV, squamous | 56                    | 1-year                | 24%; 95% CI: 19–31 |
|            | Patients diagnosed with NSCLC in 2013-2017 | 37                                                              |                         | 1-year                | 25%; 95% CI: 19–32    | NR                 |
|            | Patients diagnosed with NSCLC in 2007-2012 | 12                                                              |                         | 3-year                | 05%; 95% CI: 03–09    | NR                 |
|            | Patients diagnosed with NSCLC in 2013-2017 | 6                                                               |                         | 3-year                | 08%; 95% CI: 04–15    | NR                 |
|            | Patients diagnosed with NSCLC in 2007-2012 | 8                                                               |                         | 5-year                | 04%; 95% CI: 02–07    | NR                 |
|            | Patients diagnosed with NSCLC in 2013-2017 | 0                                                               |                         | 5-year                | 0%; 95% CI: NA        | NR                 |
|            | Patients diagnosed with NSCLC in 2007-2012 | Stage IIIB-IV NSCLC clinically diagnosed with unknown pathology |                         | 30                    | 1-year                | 08%; 95% CI: 06–11 |
|            | Patients diagnosed with NSCLC in 2013-2017 |                                                                 | 14                      | 1-year                | 06%; 95% CI: 04–09    | NR                 |
|            | Patients diagnosed with NSCLC in 2007-2012 |                                                                 | 8                       | 3-year                | 02%; 95% CI: 1–5      | NR                 |
|            | Patients diagnosed with NSCLC in 2013-2017 |                                                                 | <6                      | 3-year                | 01%; 95% CI: 00–04    | NR                 |
|            | Patients diagnosed with NSCLC in 2007-2012 |                                                                 | <6                      | 5-year                | 01%; 95% CI: 00–02    | NR                 |

| Study name               | Patient population                                       | Stage at diagnosis | Sample size (N) | Time point / Variable | Survival rate results          | p-value          |
|--------------------------|----------------------------------------------------------|--------------------|-----------------|-----------------------|--------------------------------|------------------|
|                          | Patients diagnosed with NSCLC in 2013-2017               |                    | 0               | 5-year                | 0%; 95% CI: NA                 | NR               |
| <b>Soares 2021 (43)</b>  | Diagnosed with NSCLC between 2012-2016                   | Stage I            | 174             | 1-year                | n (%): 143 (92); 95% CI: 88–96 | NR               |
|                          |                                                          | Stage I            | 174             | 2-Year                | n (%): 91 (80); 95% CI: 74–87  | NR               |
|                          |                                                          | Stage II           | 86              | 1-year                | n (%): 54 (71); 95% CI: 62–82  | NR               |
|                          |                                                          | Stage II           | 86              | 2-Year                | n (%): 31 (50); 95% CI: 40–63  | NR               |
|                          |                                                          | Stage III A        | 235             | 1-year                | n (%): 147 (69); 95% CI: 63–75 | NR               |
|                          |                                                          | Stage III A        | 235             | 2-Year                | n (%): 81 (46); 95% CI: 40–53  | NR               |
|                          | Patients diagnosed in 2015-2016-NSQ carcinoma            | Stage I or II      | 68              | 1-year                | 89%; 95% CI: 81–97             | NR               |
|                          | Patients diagnosed in 2015-2016-SQ carcinoma             | Stage I or II      | 28              | 1-year                | 76%; 95% CI: 60–95             | NR               |
|                          | Patients diagnosed in 2015-2016-NSQ carcinoma            | Stage IIIA         | 41              | 1-year                | 86%; 95% CI: 75–98             | NR               |
|                          | Patients diagnosed in 2015-2016-SQ carcinoma             | Stage IIIA         | 33              | 1-year                | 49%; 95% CI: 34–70             | NR               |
| <b>Suipte 2019 (44)</b>  | Elderly patients (>70 years) diagnosed between 2005-2007 | Stage IV           | NR              | 1-year                | 18.0% (95% CI: 11%–25%)        | 0.29 vs. elderly |
|                          | Elderly patients (>70 years) diagnosed between 2015-2016 |                    | NR              | 1-year                | 31.0% (95% CI: 22%–39%)        |                  |
|                          | Young patients (<70 years) diagnosed between 2005-2007   |                    | NR              | 1-year                | 34.0% (95% CI: 27%–42%)        | 0.049 vs young   |
|                          | Young patients (<70 years) diagnosed between 2015-2016   |                    | NR              | 1-year                | 52.0% (955 CI: 43%– 61%)       |                  |
| <b>Vachani 2021 (45)</b> | Newly diagnosed patients with stage Ia                   | Stage Ia           | NR              | 1-year                | 86.3%                          | NR               |
|                          | Newly diagnosed patients with stage Ib                   | Stage Ib           | NR              | 1-year                | 73.1%                          | NR               |
|                          | Newly diagnosed patients with stage IIa                  | Stage IIa          | NR              | 1-year                | 77.5%                          | NR               |
|                          | Newly diagnosed patients with stage IIb                  | Stage IIb          | NR              | 1-year                | 64%                            | NR               |
|                          | Newly diagnosed patients with stage IIIa                 | Stage IIIa         | NR              | 1-year                | 53.8%                          | NR               |
|                          | Newly diagnosed patients with stage IIIb                 | Stage IIIb         | NR              | 1-year                | 38.3%                          | NR               |

| Study name                | Patient population                                                         | Stage at diagnosis | Sample size (N) | Time point / Variable | Survival rate results    | p-value |
|---------------------------|----------------------------------------------------------------------------|--------------------|-----------------|-----------------------|--------------------------|---------|
|                           | Newly diagnosed patients with stage IV                                     | Stage IV           | NR              | 1-year                | 22.6%                    | NR      |
| <b>RCC</b>                |                                                                            |                    |                 |                       |                          |         |
| <b>Haas 2022 (47)</b>     | Patients with newly diagnosed localized RCC: Intermediate-high risk        | Localized          | 629             | 5-year                | 69%                      | NR      |
|                           | T3G1-G2 (intermediate-high risk subgroup)                                  |                    | 297             | 5-year                | 77%                      | NR      |
|                           | T3G3 (intermediate-high risk subgroup)                                     |                    | 250             | 5-year                | 65%                      | NR      |
|                           | T3G4 (intermediate-high risk subgroup)                                     |                    | 64              | 5-year                | 37%                      | NR      |
|                           | High risk                                                                  |                    | 14              | 5-year                | 36%                      | NR      |
| <b>Haas 2022b (48)</b>    | Intermediate-high risk                                                     |                    | NR              | 5-year                | 69%                      | NR      |
|                           | High risk                                                                  |                    | NR              | 5-year                | 58%                      | NR      |
|                           | Patients without recurrence among intermediate-high risk and high risk RCC |                    | NR              | 5-year                | 85%                      | NR      |
|                           | Patients with recurrence among intermediate-high risk and high risk RCC    |                    | NR              | 5-year                | 57%                      | NR      |
|                           | Patients with recurrence among intermediate-high risk RCC                  |                    | NR              | 5-year                | 58%                      | NR      |
|                           | Patients with recurrence among high risk RCC                               |                    | NR              | 5-year                | 57%                      | NR      |
| <b>Li 2021 (49)</b>       | ccRCC: White (after PSM)                                                   | Overall            | 23559           | 5-year                | 80.3%; 95% CI:78.9, 81.7 | NR      |
|                           |                                                                            | Localized          | 16,878          | 5-year                | 90.3%; 95% CI:89.0, 91.5 | NR      |
|                           |                                                                            | Regional           | 4,351           | 5-year                | 70%; 95% CI:65.8, 74.6   | NR      |
|                           |                                                                            | Distant            | 2330            | 5-year                | 34.1%; 95% CI:26.7, 43.5 | NR      |
|                           | ccRCC: Asian (after PSM)                                                   | Overall            | 1586            | 5-year                | 81.2%; 95% CI:78.8, 83.7 | NR      |
|                           |                                                                            | Localized          | 1164            | 5-year                | 91.9%; 95% CI:89.8, 94.1 | NR      |
|                           |                                                                            | Regional           | 261             | 5-year                | 71.5%; 95% CI:64.7, 79.0 | NR      |
|                           |                                                                            | Distant            | 161             | 5-year                | 20.3%; 95% CI:13.1, 31.4 | NR      |
| <b>TNBC</b>               |                                                                            |                    |                 |                       |                          |         |
| <b>Schwartz 2018 (12)</b> | Percentage alive at 1 year                                                 | Stage III and IV   | 1244            | 1-year                | 60% (95% CI: 57%–63%)    | NR      |
|                           | Percentage alive at 3 years                                                | Stage III and IV   | 1244            | 3-years               | 33% (95% CI: 30%–36%)    | NR      |
|                           | All AJCC stage III cases                                                   | Stage III          | 828             | 1-year                | 76% (95% CI: 73%–78%)    | NR      |

| Study name                | Patient population                                         | Stage at diagnosis | Sample size (N) | Time point / Variable | Survival rate results | p-value |
|---------------------------|------------------------------------------------------------|--------------------|-----------------|-----------------------|-----------------------|---------|
|                           | All AJCC stage III cases                                   | Stage III          | 828             | 3-years               | 44% (95% CI: 41%–48%) | NR      |
|                           | All AJCC stage IV cases                                    | Stage IV           | 416             | 1-year                | 29% (95% CI: 25%–34%) | NR      |
|                           | All AJCC stage IV cases                                    | Stage IV           | 416             | 3-years               | 11% (95% CI: 8%–14%)  | NR      |
| <b>Yousefi 2017 (54)</b>  | Overall                                                    | Overall            | 180             | 5-year                | 56%                   | NR      |
|                           | Stage I                                                    | Stage I            | 14              | 5-year                | 92.3%                 | NR      |
|                           | Stage II                                                   | Stage II           | 88              | 5-year                | 86.5%                 | NR      |
|                           | Stage III                                                  | Stage III          | 57              | 5-year                | 57.8%                 | NR      |
|                           | Stage IV                                                   | Stage IV           | 8               | 5-year                | 9%                    | NR      |
| <b>Gogate 2022 (51)</b>   | All systemically treated patients diagnosed at early stage | Early stage        | 462             | 36 months             | 85.7% (SE: 1.8)       | NR      |
| <b>Lehrberg 2021 (52)</b> | Overall African American and White-American patients       | Early stage        | 286             | 5-year                | 82% (95% CI: 77%–87%) | NR      |

<sup>a</sup> Defined as “survival relative to the total population of England.

<sup>b</sup> Cumulative OS

<sup>c</sup> Median all-cause survival

Abbreviations: 1L: First line; 2L: Second line; AJCC: American Joint Committee on Cancer; CI: Confidence interval; EGFR: Estimated glomerular filtration rate; NA: Not available; NR: Not reported; NSCLC: Non-small cell lung cancer; NSQ: Non-squamous; OS: Overall survival; RCC: Renal cell carcinoma; SD: Standard deviation; SE: Standard error; SEER: Surveillance, Epidemiology, and End Results; SQ: Squamous; TNBC: Triple negative breast cancer; TNM: Tumor (T), nodes (N), and metastases (M)

## 10 Risk of bias results

### Quality assessment of included studies – Newcastle-Ottawa Quality Assessment Scale (cohort studies)

| Study name             | Selection                                                         |                                                              |                                                    |                                                                                                   | Comparability | Outcome                                                                                  |                                                |                                                                          | Total score | Interpretation |
|------------------------|-------------------------------------------------------------------|--------------------------------------------------------------|----------------------------------------------------|---------------------------------------------------------------------------------------------------|---------------|------------------------------------------------------------------------------------------|------------------------------------------------|--------------------------------------------------------------------------|-------------|----------------|
|                        | Question 1: Representativeness of the exposed cohort <sup>1</sup> | Question 2: Selection of the non-exposed cohort <sup>2</sup> | Question 3: Ascertainment of exposure <sup>3</sup> | Question 4: Demonstration that outcome of interest was not present at start of study <sup>4</sup> |               | Question 1: Comparability of cohorts on the basis of the design or analysis <sup>5</sup> | Question 1: Assessment of outcome <sup>6</sup> | Question 2: Was follow-up long enough for outcomes to occur <sup>7</sup> |             |                |
| <b>Bladder cancer</b>  |                                                                   |                                                              |                                                    |                                                                                                   |               |                                                                                          |                                                |                                                                          |             |                |
| Aly 2019 (57)          | a) *                                                              | a) *                                                         | a) *                                               | b)                                                                                                | c)            | b) *                                                                                     | a) *                                           | d)                                                                       | *****       | Medium quality |
| Amiri 2020 (13)        | a) *                                                              | c)                                                           | a) *                                               | b)                                                                                                | c)            | b) *                                                                                     | b)                                             | a) *                                                                     | ****        | Medium quality |
| Aragon-Ching 2021 (14) | a) *                                                              | c)                                                           | a) *                                               | b)                                                                                                | c)            | b) *                                                                                     | a) *                                           | d)                                                                       | ****        | Medium quality |
| Davies 2020 (15)       | a) *                                                              | c)                                                           | a) *                                               | b)                                                                                                | c)            | b) *                                                                                     | a) *                                           | d)                                                                       | ****        | Medium quality |
| Fisher 2018 (1)        | a) *                                                              | a) *                                                         | a) *                                               | b)                                                                                                | a) **         | b) *                                                                                     | a) *                                           | d)                                                                       | *****       | Medium quality |
| Omland 2021 (16)       | a) *                                                              | a) *                                                         | a) *                                               | b)                                                                                                | c)            | b) *                                                                                     | a) *                                           | b) *                                                                     | *****       | Medium quality |
| Sorup 2021 (17)        | a) *                                                              | c)                                                           | a) *                                               | b)                                                                                                | c)            | b) *                                                                                     | a)                                             | d)                                                                       | ***         | Low quality    |
| Yu 2019 (56)           | a) *                                                              | c)                                                           | b) *                                               | b)                                                                                                | c)            | d)                                                                                       | b)                                             | d)                                                                       | **          | Low quality    |
| <b>Gastric cancer</b>  |                                                                   |                                                              |                                                    |                                                                                                   |               |                                                                                          |                                                |                                                                          |             |                |
| Dijksterhuis 2022 (18) | b) *                                                              | c)                                                           | a) *                                               | b)                                                                                                | c)            | b) *                                                                                     | b)                                             | d)                                                                       | ***         | Low quality    |
| Qiu 2018 (19)          | a) *                                                              | a) *                                                         | a) *                                               | a) *                                                                                              | c)            | b) *                                                                                     | b)                                             | d)                                                                       | *****       | Medium quality |



| Study name                  | Selection                                             |                                                  |                                         |                                                                                       | Comparability                                                                | Outcome                            |                                                              |                                               | Total score | Interpretation |
|-----------------------------|-------------------------------------------------------|--------------------------------------------------|-----------------------------------------|---------------------------------------------------------------------------------------|------------------------------------------------------------------------------|------------------------------------|--------------------------------------------------------------|-----------------------------------------------|-------------|----------------|
|                             | Question 1: Representativeness of the exposed cohort1 | Question 2: Selection of the non-exposed cohort2 | Question 3: Ascertainment of exposure 3 | Question 4: Demonstration that outcome of interest was not present at start of study4 | Question 1: Comparability of cohorts on the basis of the design or analysis5 | Question 1: Assessment of outcome6 | Question 2: Was follow-up long enough for outcomes to occur7 | Question 3: Adequacy of follow up of cohorts8 |             |                |
| <b>Head and neck cancer</b> |                                                       |                                                  |                                         |                                                                                       |                                                                              |                                    |                                                              |                                               |             |                |
| Amarillo 2021 (20)          | b) *                                                  | c)                                               | d)                                      | b)                                                                                    | c)                                                                           | d)                                 | a) *                                                         | d)                                            | **          | Low quality    |
| Ho 2019 (2)                 | a) *                                                  | c)                                               | a) *                                    | a) *                                                                                  | c)                                                                           | b) *                               | a) *                                                         | d)                                            | *****       | Medium quality |
| Hochfelder 2020 (21)        | a) *                                                  | a) *                                             | a) *                                    | b)                                                                                    | c)                                                                           | b) *                               | a) *                                                         | d)                                            | *****       | Medium quality |
| Neto 2021 (22)              | a) *                                                  | c)                                               | a) *                                    | b)                                                                                    | c)                                                                           | b) *                               | a) *                                                         | d)                                            | ****        | Medium quality |
| Sargeran 2009 (24)          | b) *                                                  | c)                                               | a) *                                    | b)                                                                                    | c)                                                                           | b) *                               | a) *                                                         | b) *                                          | *****       | Medium quality |
| Sargeran 2008 (23)          | b) *                                                  | c)                                               | a) *                                    | b)                                                                                    | c)                                                                           | b) *                               | a) *                                                         | b) *                                          | *****       | Medium quality |
| <b>Melanoma</b>             |                                                       |                                                  |                                         |                                                                                       |                                                                              |                                    |                                                              |                                               |             |                |
| Ngo 2020 (25)               | d)                                                    | c)                                               | d)                                      | b)                                                                                    | c)                                                                           | d)                                 | a) *                                                         | d)                                            | *           | Low quality    |
| Ramond 2021 (26)            | a) *                                                  | c)                                               | a) *                                    | b)                                                                                    | c)                                                                           | b) *                               | a) *                                                         | d)                                            | ****        | Medium quality |
| Song 2015 (4)               | a) *                                                  | c)                                               | a) *                                    | b)                                                                                    | c)                                                                           | b) *                               | a) *                                                         | d)                                            | ****        | Medium quality |
| Tjokrowidjaja 2021 (27)     | a) *                                                  | c)                                               | a) *                                    | b)                                                                                    | c)                                                                           | b) *                               | a) *                                                         | d)                                            | ****        | Medium quality |
| Wilson 2019 (6)             | a) *                                                  | c)                                               | a) *                                    | b)                                                                                    | c)                                                                           | b) *                               | a) *                                                         | d)                                            | ****        | Medium quality |
| Winge-Main 2020 (28)        | a) *                                                  | c)                                               | a) *                                    | b)                                                                                    | c)                                                                           | b) *                               | a)                                                           | d)                                            | ***         | Low quality    |
| Toscana 2020 (5)            | b) *                                                  | c)                                               | b) *                                    | b)                                                                                    | c)                                                                           | c)                                 | b)                                                           | d)                                            | **          | Low quality    |

| Study name          | Selection                                             |                                                  |                                         |                                                                                       | Comparability                                                                | Outcome                            |                                                              |                                               | Total score | Interpretation |
|---------------------|-------------------------------------------------------|--------------------------------------------------|-----------------------------------------|---------------------------------------------------------------------------------------|------------------------------------------------------------------------------|------------------------------------|--------------------------------------------------------------|-----------------------------------------------|-------------|----------------|
|                     | Question 1: Representativeness of the exposed cohort1 | Question 2: Selection of the non-exposed cohort2 | Question 3: Ascertainment of exposure 3 | Question 4: Demonstration that outcome of interest was not present at start of study4 | Question 1: Comparability of cohorts on the basis of the design or analysis5 | Question 1: Assessment of outcome6 | Question 2: Was follow-up long enough for outcomes to occur7 | Question 3: Adequacy of follow up of cohorts8 |             |                |
| <b>NSCLC</b>        |                                                       |                                                  |                                         |                                                                                       |                                                                              |                                    |                                                              |                                               |             |                |
| Abrão 2021 (29)     | a) *                                                  | c)                                               | a) *                                    | a) *                                                                                  | c)                                                                           | b) *                               | a) *                                                         | a) *                                          | *****       | Medium quality |
| Abrão 2022 (30)     | a) *                                                  | c)                                               | a) *                                    | b)                                                                                    | c)                                                                           | b) *                               | a) *                                                         | a) *                                          | *****       | Medium quality |
| Azzouqa 2019 (31)   | a) *                                                  | a) *                                             | a) *                                    | b)                                                                                    | c)                                                                           | b) *                               | a) *                                                         | d)                                            | *****       | Medium quality |
| Berglund 2012 (7)   | a) *                                                  | c)                                               | a) *                                    | a) *                                                                                  | c)                                                                           | b) *                               | a) *                                                         | d)                                            | ****        | Medium quality |
| Buck 2015 (58)      | a) *                                                  | c)                                               | a) *                                    | b)                                                                                    | c)                                                                           | b) *                               | b)                                                           | d)                                            | ***         | Low quality    |
| Cerqueira 2022 (32) | a) *                                                  | c)                                               | a) *                                    | b)                                                                                    | c)                                                                           | b) *                               | a) *                                                         | d)                                            | ****        | Medium quality |
| Ehrenstein 2022 (8) | a) *                                                  | a) *                                             | a) *                                    | b)                                                                                    | c)                                                                           | b) *                               | a) *                                                         | d)                                            | *****       | Medium quality |
| Ekman 2019 (33)     | a) *                                                  | a) *                                             | a) *                                    | b)                                                                                    | c)                                                                           | b) *                               | a) *                                                         | d)                                            | *****       | Medium quality |
| Flores 2021 (9)     | a) *                                                  | c)                                               | a) *                                    | a) *                                                                                  | c)                                                                           | b) *                               | a) *                                                         | d)                                            | *****       | Medium quality |
| Gildea 2017 (59)    | a) *                                                  | c)                                               | a) *                                    | b)                                                                                    | c)                                                                           | b) *                               | a) *                                                         | d)                                            | ****        | Medium quality |
| Greystoke 2021 (34) | a) *                                                  | c)                                               | a) *                                    | b)                                                                                    | c)                                                                           | b) *                               | a) *                                                         | d)                                            | ****        | Medium quality |
| Jazieh 2021 (35)    | a) *                                                  | a) *                                             | a) *                                    | b)                                                                                    | c)                                                                           | b) *                               | b)                                                           | c)                                            | ****        | Medium quality |
| Kalilani 2022 (36)  | a) *                                                  | c)                                               | a) *                                    | b)                                                                                    | c)                                                                           | b) *                               | a) *                                                         | d)                                            | ****        | Medium quality |

| Study name           | Selection                                             |                                                  |                                         |                                                                                       | Comparability                                                                | Outcome                            |                                                              |                                               | Total score | Interpretation |
|----------------------|-------------------------------------------------------|--------------------------------------------------|-----------------------------------------|---------------------------------------------------------------------------------------|------------------------------------------------------------------------------|------------------------------------|--------------------------------------------------------------|-----------------------------------------------|-------------|----------------|
|                      | Question 1: Representativeness of the exposed cohort1 | Question 2: Selection of the non-exposed cohort2 | Question 3: Ascertainment of exposure 3 | Question 4: Demonstration that outcome of interest was not present at start of study4 | Question 1: Comparability of cohorts on the basis of the design or analysis5 | Question 1: Assessment of outcome6 | Question 2: Was follow-up long enough for outcomes to occur7 | Question 3: Adequacy of follow up of cohorts8 |             |                |
| Klarenbeek 2022 (37) | a) *                                                  | c)                                               | a) *                                    | a) *                                                                                  | c)                                                                           | b) *                               | a) *                                                         | a) *                                          | *****       | Medium quality |
| Komiya 2020 (38)     | a) *                                                  | a) *                                             | a) *                                    | b)                                                                                    | c)                                                                           | b) *                               | a) *                                                         | d)                                            | *****       | Medium quality |
| Luciano 2020 (39)    | a) *                                                  | a) *                                             | a) *                                    | b)                                                                                    | c)                                                                           | b) *                               | b)                                                           | d)                                            | ****        | Medium quality |
| Martin 2022 (40)     | b) *                                                  | c)                                               | a) *                                    | a) *                                                                                  | c)                                                                           | b) *                               | a) *                                                         | d)                                            | *****       | Medium quality |
| Monteiro 2022 (10)   | b) *                                                  | a) *                                             | a) *                                    | b)                                                                                    | c)                                                                           | b) *                               | a) *                                                         | d)                                            | *****       | Medium quality |
| Potter 2022 (41)     | a) *                                                  | c)                                               | a) *                                    | a) *                                                                                  | b) *                                                                         | b) *                               | b)                                                           | d)                                            | *****       | Medium quality |
| Ritberg 2021 (42)    | d)                                                    | c)                                               | d)                                      | b)                                                                                    | c)                                                                           | d)                                 | a) *                                                         | d)                                            | *           | Low quality    |
| Snee 2021 (11)       | a) *                                                  | a) *                                             | a) *                                    | b)                                                                                    | c)                                                                           | b) *                               | a) *                                                         | d)                                            | *****       | Medium quality |
| Soares 2021 (43)     | a) *                                                  | a) *                                             | a) *                                    | b)                                                                                    | c)                                                                           | b) *                               | a) *                                                         | c)                                            | *****       | Medium quality |
| Suijpyte 2019 (44)   | b) *                                                  | a) *                                             | d)                                      | b)                                                                                    | c)                                                                           | d)                                 | a) *                                                         | d)                                            | ***         | Low quality    |
| Vachani 2021 (45)    | a) *                                                  | a) *                                             | a) *                                    | b)                                                                                    | c)                                                                           | b) *                               | a) *                                                         | d)                                            | *****       | Medium quality |
| Van Dao 2022 (46)    | a) *                                                  | a) *                                             | a) *                                    | b)                                                                                    | c)                                                                           | b) *                               | a) *                                                         | b) *                                          | *****       | Medium quality |
| Tjong 2021 (55)      | a) *                                                  | c)                                               | a) *                                    | b)                                                                                    | c)                                                                           | b) *                               | a) *                                                         | d)                                            | ****        | Medium quality |
| <b>RCC</b>           |                                                       |                                                  |                                         |                                                                                       |                                                                              |                                    |                                                              |                                               |             |                |
| Haas 2022a (47)      | a) *                                                  | c)                                               | a) *                                    | b)                                                                                    | c)                                                                           | b) *                               | a)                                                           | d)                                            | ***         | Low quality    |
| Haas 2022b (47)      | a) *                                                  | c)                                               | a) *                                    | b)                                                                                    | c)                                                                           | b) *                               | a) *                                                         | d)                                            | ****        | Medium quality |

| Study name          | Selection                                             |                                                  |                                          |                                                                                       | Comparability                                                                | Outcome                            |                                                              |                                               | Total score | Interpretation |
|---------------------|-------------------------------------------------------|--------------------------------------------------|------------------------------------------|---------------------------------------------------------------------------------------|------------------------------------------------------------------------------|------------------------------------|--------------------------------------------------------------|-----------------------------------------------|-------------|----------------|
|                     | Question 1: Representativeness of the exposed cohort1 | Question 2: Selection of the non-exposed cohort2 | Question 3: Ascertain ment of exposure 3 | Question 4: Demonstration that outcome of interest was not present at start of study4 | Question 1: Comparability of cohorts on the basis of the design or analysis5 | Question 1: Assessment of outcome6 | Question 2: Was follow-up long enough for outcomes to occur7 | Question 3: Adequacy of follow up of cohorts8 |             |                |
| Li 2021 (49)        | a) *                                                  | c)                                               | a) *                                     | b)                                                                                    | c)                                                                           | b) *                               | a) *                                                         | a) *                                          | *****       | Medium quality |
| <b>TNBC</b>         |                                                       |                                                  |                                          |                                                                                       |                                                                              |                                    |                                                              |                                               |             |                |
| Aly 2019a (50)      | a) *                                                  | a) *                                             | a) *                                     | b)                                                                                    | c)                                                                           | b) *                               | a) *                                                         | d)                                            | *****       | Medium quality |
| Gogate 2022 (51)    | a) *                                                  | c)                                               | a) *                                     | b)                                                                                    | c)                                                                           | b) *                               | a) *                                                         | b) *                                          | *****       | Medium quality |
| Haiderali 2021 (60) | a) *                                                  | a) *                                             | a) *                                     | b)                                                                                    | c)                                                                           | b) *                               | a) *                                                         | d)                                            | *****       | Medium quality |
| Lehrberg 2021 (52)  | b) *                                                  | c)                                               | a) *                                     | a) *                                                                                  | c)                                                                           | b) *                               | a) *                                                         | a) *                                          | *****       | Medium quality |
| Schwartz 2018 (12)  | a) *                                                  | c)                                               | a) *                                     | b)                                                                                    | c)                                                                           | b) *                               | a) *                                                         | d)                                            | ****        | Medium quality |
| Sieluk 2020 (53)    | a) *                                                  | a) *                                             | a) *                                     | b)                                                                                    | a) **                                                                        | b) *                               | b)                                                           | d)                                            | *****       | Medium quality |
| Yousefi 2017 (54)   | a) *                                                  | c)                                               | a) *                                     | b)                                                                                    | c)                                                                           | b) *                               | a) *                                                         | a) *                                          | *****       | Medium quality |

<sup>1</sup> a) truly representative of the average \_\_\_\_ (describe) in the community (\*); b) somewhat representative of the average \_\_\_\_ in the community (\*); c) selected group of users e.g., nurses, volunteers; d) no description of the derivation of the cohort

<sup>2</sup> a) drawn from the same community as the exposed cohort (\*); b) drawn from a different source; c) no description of the derivation of the non-exposed cohort

<sup>3</sup> a) secure record (\*); b) structured interview (\*); c) written self-report; d) no description

<sup>4</sup> a) yes (\*); b) no

<sup>5</sup> a) study controls for \_\_\_\_ (select the most important factor) (\*\*); b) study controls for any additional factor (\*); c) Cohort are not comparable on the basis of design or analysis controlled for confounders

<sup>6</sup> a) independent blind assessment (\*); b) record linkage (\*); c) self-report; d) no description

<sup>7</sup> a) yes (\*); b) no

<sup>8</sup> a) complete follow up - all subjects accounted for (\*); b) subjects lost to follow up unlikely to introduce bias - small number lost - > \_\_\_\_ % follow up, or description provided of those lost) (\*); c) follow up rate < \_\_\_\_ % and no description of those lost; d) no statement

Abbreviations: NSCLC: Non-small cell lung cancer; RCC: Renal cell carcinoma; TNBC: Triple negative breast cancer

**Quality assessment of included studies – Cost of Illness study checklist**

| Study name                                                                                                                                                                              | Cost-of-Illness Study checklist                                                                                       |                                                                                                    | Study name                                                                       |
|-----------------------------------------------------------------------------------------------------------------------------------------------------------------------------------------|-----------------------------------------------------------------------------------------------------------------------|----------------------------------------------------------------------------------------------------|----------------------------------------------------------------------------------|
| <b>(1) Analytical framework: what costs should have been measured?</b>                                                                                                                  | (a) What was the motivation and perspective of the study?                                                             |                                                                                                    | Singh 2021<br>This study was performed from a health care provider's perspective |
|                                                                                                                                                                                         | b) Was the appropriate epidemiologic approach taken?                                                                  |                                                                                                    | Yes                                                                              |
|                                                                                                                                                                                         | (c) Was the study question well specified?                                                                            | (i) Were all relevant, non-trivial cost components and their stakeholders identified?              | Yes                                                                              |
|                                                                                                                                                                                         |                                                                                                                       | (ii) Were necessary timeframes specified?                                                          | Yes                                                                              |
|                                                                                                                                                                                         |                                                                                                                       | (iii) Was a case of disease or risk factor adequately and appropriately defined?                   | Yes                                                                              |
| (iv) Was the counterfactual population occurrence plausible and meaningful?                                                                                                             |                                                                                                                       | Unclear                                                                                            |                                                                                  |
| <b>(2) Methodology and data: how well were resource use and productivity losses measured?</b>                                                                                           | (a) Was an appropriate method(s) of quantification used, such that                                                    | (i) additional, or excess, costs were measured?                                                    | Yes                                                                              |
|                                                                                                                                                                                         |                                                                                                                       | (ii) only costs specific to (caused by) the health problem were included (confounders controlled)? | Yes                                                                              |
|                                                                                                                                                                                         |                                                                                                                       | (iii) all important effects were captured?                                                         | Yes                                                                              |
|                                                                                                                                                                                         |                                                                                                                       | (iv) important differences across subpopulations were accounted for?                               | Yes                                                                              |
|                                                                                                                                                                                         |                                                                                                                       | (v) the required level of detail could be provided?                                                | Yes                                                                              |
|                                                                                                                                                                                         | (b) Was the resource quantification method(s) well executed?                                                          | (i) For population-based studies, were cost allocation methods, data and assumptions valid?        | NR                                                                               |
|                                                                                                                                                                                         |                                                                                                                       | (ii) For person-based studies, were appropriate statistical tests performed and reported?          | Yes                                                                              |
|                                                                                                                                                                                         |                                                                                                                       | (iii) Were data representative of the study population?                                            | Yes                                                                              |
|                                                                                                                                                                                         |                                                                                                                       | (iv) Were there any other relevant resource quantification issues?                                 | Unclear                                                                          |
|                                                                                                                                                                                         | c) Were healthcare resources valued appropriately?                                                                    |                                                                                                    | No                                                                               |
| d) Was the approach for valuing production losses justified, and assumptions valid?                                                                                                     |                                                                                                                       | Unclear                                                                                            |                                                                                  |
| (e) Was the inclusion of intangible costs appropriate:                                                                                                                                  | (i) Was double counting of mortality-related production losses avoided?                                               | NR                                                                                                 |                                                                                  |
|                                                                                                                                                                                         | (ii) Were losses valued appropriately, given the study's perspective?                                                 | NR                                                                                                 |                                                                                  |
| <b>(3) Analysis and reporting</b>                                                                                                                                                       | (a) Did the analysis address the study question?                                                                      |                                                                                                    | Yes                                                                              |
|                                                                                                                                                                                         | (b) Was a range of estimates presented?                                                                               |                                                                                                    | Yes                                                                              |
|                                                                                                                                                                                         | (c) Were the main uncertainties identified?                                                                           |                                                                                                    | Yes                                                                              |
|                                                                                                                                                                                         | d) Was a sensitivity analysis performed on:                                                                           | (i) important (uncertain) parameter estimates?                                                     | Yes                                                                              |
|                                                                                                                                                                                         |                                                                                                                       | (ii) key assumptions? (including the counterfactual)                                               | Unclear                                                                          |
|                                                                                                                                                                                         |                                                                                                                       | (iii) point estimates? (based on confidence or credible intervals)                                 | Unclear                                                                          |
|                                                                                                                                                                                         | e) Was adequate documentation and justification given for cost components, data and sources, assumptions and methods? |                                                                                                    | Yes                                                                              |
|                                                                                                                                                                                         | f) Was uncertainty around the estimates and its implications adequately discussed?                                    |                                                                                                    | Yes                                                                              |
| g) Were important limitations discussed regarding the cost components, data, assumptions and methods?                                                                                   |                                                                                                                       | Yes                                                                                                |                                                                                  |
| h) Were the results presented at the appropriate level of detail to answer the study question (cost components; disease subtypes, severity, stage; subpopulation groups, cost bearers)? |                                                                                                                       | Yes                                                                                                |                                                                                  |

## 11 References

1. Fisher MD, Shenolikar R, Miller PJ, Fenton M, Walker MS. Treatment Patterns and Outcomes in Stage IV Bladder Cancer in a Community Oncology Setting: 2008-2015. *Clin Genitourin Cancer*. 2018;16(6):e1171-e9; doi:10.1016/j.clgc.2018.07.025.
2. Ho PS, Wang WC, Huang YT, Yang YH. Finding an oral potentially malignant disorder in screening program is related to early diagnosis of oral cavity cancer - Experience from real world evidence. *Oral Oncol*. 2019;89:107-14; doi:10.1016/j.oraloncology.2018.12.007.
3. Singh AG, Chaukar D, Gupta S, Pramesh CS, Sullivan R, Chaturvedi P, et al. A prospective study to determine the cost of illness for oral cancer in India. *Ecancermedicalsecience*. 2021;15:1252; doi:10.3332/ecancer.2021.1252.
4. Song X, Zhao Z, Barber B, Farr AM, Ivanov B, Novich M. Overall survival in patients with metastatic melanoma. *Curr Med Res Opin*. 2015;31(5):987-91; doi:10.1185/03007995.2015.1021904.
5. Toscano A, Blanchin M, Bourdon M, Bonnaud Antignac A, Sebille V. Longitudinal associations between coping strategies, locus of control and health-related quality of life in patients with breast cancer or melanoma. *Qual Life Res*. 2020;29(5):1271-9; doi:10.1007/s11136-019-02401-8.
6. Wilson MA, Zhong J, Rosenbaum BE, Utter K, Moran U, Darvishian F, et al. Impact of initial stage on metastatic melanoma survival. *Melanoma Res*. 2019;29(3):281-8; doi:10.1097/CMR.0000000000000526.
7. Berglund A, Lambe M, Luchtenborg M, Linklater K, Peake MD, Holmberg L, et al. Social differences in lung cancer management and survival in South East England: a cohort study. *BMJ Open*. 2012;2(3); doi:10.1136/bmjopen-2012-001048.
8. Ehrenstein V, Eriksen K, Taylor A, Servidio L, Jakobsen E. Characteristics and overall survival of patients with early-stage non-small cell lung cancer: A cohort study in Denmark. *Cancer Med*. 2022; doi:10.1002/cam4.4946.
9. Flores R, Patel P, Alpert N, Pyenson B, Taioli E. Association of Stage Shift and Population Mortality Among Patients With Non-Small Cell Lung Cancer. *JAMA Netw Open*. 2021;4(12):e2137508; doi:10.1001/jamanetworkopen.2021.37508.
10. Monteiro AS, Araujo SRC, Araujo LH, Souza MC. Impact of microvascular invasion on 5-year overall survival of resected non-small cell lung cancer. *J Bras Pneumol*. 2022;48(3):e20210283; doi:10.36416/1806-3756/e20210283.
11. Snee M, Cheeseman S, Thompson M, Riaz M, Sopwith W, Lacoïn L, et al. Treatment patterns and survival outcomes for patients with non-small cell lung cancer in the UK in the preimmunology era: a REAL-Oncology database analysis from the I-O Optimise initiative. *BMJ Open*. 2021;11(9):e046396; doi:10.1136/bmjopen-2020-046396.
12. Schwartz KL, Simon MS, Bylsma LC, Ruterbusch JJ, Beebe-Dimmer JL, Schultz NM, et al. Clinical and economic burden associated with stage III to IV triple-negative breast cancer: A SEER-Medicare historical cohort study in elderly women in the United States. *Cancer*. 2018;124(10):2104-14; doi:10.1002/cncr.31299.

13. Amiri M, Heshmatollah S, Esmaeilnasab N, Khoubi J, Ghaderi E, Roshani D. Survival rate of patients with bladder cancer and its related factors in Kurdistan Province (2013-2018): a population-based study. *BMC Urol.* 2020;20(1):195; doi:10.1186/s12894-020-00769-1.
14. Aragon-Ching JB, Wang H. Comparative analyses of survival differences in patients with urothelial versus non-urothelial upper tract carcinomas: Results from the National Cancer Database (NCDB). *Journal of Clinical Oncology.* 2021;39(15\_suppl):e16582-e; doi:10.1200/JCO.2021.39.15\_suppl.e16582.
15. Davies FJ, Knott C, Kerr C, Adedokun L, Lockhat DM. Utilising Public Health England Datasets to Establish a Standing Cohort of Patients with Metastatic Bladder Cancer: Initial Results and Algorithm Defining Disease Progression. *Value Health.* 2020;23(Suppl. 2):S480-S1.
16. Omland LH, Lindberg H, Carus A, Als AB, Jensen NV, Taarnhøj GA, et al. Real-world Treatment Patterns and Overall Survival in Locally Advanced and Metastatic Urothelial Tract Cancer Patients Treated with Chemotherapy in Denmark in the Preimmunotherapy Era: A Nationwide, Population-based Study. *Eur Urol Open Sci.* 2021;24:1-8; doi:10.1016/j.euros.2020.12.002.
17. Sørup S, Darvalics B, Kearney M, Mahmoudpour SH, Oksen D, Kolitsopoulos F, et al. Treatment Patterns, Clinical Outcomes, And Healthcare Resource Use Among Patients With Stage IV Urothelial Cancer: Findings From A Nationwide Cohort Study In Denmark. *Value in Health.* 2021;24(S65); doi:10.1016/j.jval.2021.04.332.
18. Dijksterhuis WPM, Kroese TE, Verhoeven RHA, van Rossum PSN, Mook S, Haj Mohammad N, et al. A population-based study on treatment and outcomes in patients with gastric adenocarcinoma diagnosed with distant interval metastases. *Eur J Surg Oncol.* 2022;48(9):1964-71; doi:10.1016/j.ejso.2022.03.003.
19. Qiu MZ, Shi SM, Chen ZH, Yu HE, Sheng H, Jin Y, et al. Frequency and clinicopathological features of metastasis to liver, lung, bone, and brain from gastric cancer: A SEER-based study. *Cancer Med.* 2018;7(8):3662-72; doi:10.1002/cam4.1661.
20. Amarillo D, Herrera G, Lara G, Muñoz E, Sanchez S, Sommer P, et al. P-216 Impact of delay in treatment initiation in Overall Survival in Head and Neck Cancer. *Oral Oncology.* 2021;118:3; doi:10.1016/S1368-8375(21)00499-1.
21. Hochfelder GC, McGinn AP, Mehta V, Castellucci E, Kabarriti R, Julian Ow T. First-Line Surgery Is Associated with Longer Overall Survival in Locoregionally Advanced Hypopharyngeal Cancer in the National Cancer Database. *Journal of the American College of Surgeons.* 2020;231(4):S190; doi:10.1016/j.jamcollsurg.2020.07.313.
22. Neto FL, Sousa LG, Johnson FM, Lee JJ, Frank SJ, Moreno AC, et al. Comparative assessment of the eighth and seventh AJCC staging edition prognostic performance of patients with p16 positive oropharynx cancer. *Journal of Clinical Oncology.* 2021;39(15\_suppl):6067-; doi:10.1200/JCO.2021.39.15\_suppl.6067.
23. Sargeran K, Murtomaa H, Safavi SMR, Vehkalahti MM, Teronen O. Survival after diagnosis of cancer of the oral cavity. *Br J Oral Maxillofac Surg.* 2008;46(3):187-91; doi:10.1016/j.bjoms.2007.11.004.
24. Sargeran K, Murtomaa H, Safavi SMR, Vehkalahti MM. Survival After Lip Cancer Diagnosis. *The Journal of Craniofacial Surgery.* 2009;20(1); doi:10.1097/SCS.0b013e31818431bd.

25. Ngo P, Ko J, Sussman TA, Li H, Hobbs B, Gastman B, et al. Survival and recurrence patterns of stage II and III cutaneous melanoma by AJCC 8th edition staging. *Pigment Cell and Melanoma Research*. 2020;33(1):213.
26. Ramond A, Carroll R, Vekeria S, Nordstrom B. Investigating Secular Trends in the Survival of Melanoma Patients in England. *The International Society for Pharmacoeconomics and Outcomes Research (ISPOR)*. 2021;24(1); doi:10.1016/j.jval.2021.04.206.
27. Tjokrowidjaja A, Browne L, Soudy H. External validation of the American Joint Committee on Cancer melanoma staging system eighth edition using the surveillance, epidemiology, and end results program. *Asia Pac J Clin Oncol*. 2022;18(5):e280-e8; doi:10.1111/ajco.13689.
28. Winge-Main A, Robsahm TE, Nyakas MS, Festervoll G, Torkilseng E, Thybo S, et al. Long-term outcomes of stage IIB-IV melanoma patients: Nationwide data from Norway. *Annals of Oncology*. 2020;31(Suppl. 4):S766-S7; doi:10.1016/j.annonc.2020.08.1273.
29. Abrao FC, Peres SV, de Abreu I, Younes RN. Prognostic factors and patients' profile in treated stage I and II lung adenocarcinoma: a Hospital's Cancer Registry-based analysis. *J Thorac Dis*. 2021;13(11):6294-303; doi:10.21037/jtd-21-1071.
30. Abrao FC, de Abreu I, Silva VG, Rosamilia GA, Peres SV, Hanriot RM, et al. Overall survival and prognostic factors in Stage I lung adenocarcinoma treated with curative intent: A real-life 19-year cohort study. *J Surg Oncol*. 2022;126(6):1114-22; doi:10.1002/jso.27015.
31. Azzouqa A-G, Chen R, Lou Y, Ailawadhi S, Manochakian R. Impact of time to treatment initiation (TTI) on survival of patients with newly diagnosed non-small cell lung cancer (NSCLC). *Journal of Clinical Oncology*. 2019;37(15\_suppl):9058-; doi:10.1200/JCO.2019.37.15\_suppl.9058.
32. Cerqueira ER, Padula AC, Alencar Junior FO, Rego MADC, Almeida M, de Mendonça Batista P, et al. Characterization of Clinical Features and Treatment of Non-Small Cell Lung Cancer (NSCLC) STAGE III and IV in Brazil- a Retrospective DATA-Base Study. *Value in Health*. 2022;25(7):S443-S4; doi:10.1016/j.jval.2022.04.803.
33. Ekman S, Sørensen JB, Brustugun OT, Horvat P, Patel D, Rosenlund M, et al. Treatment (Tx) patterns and overall survival (OS) in patients (pts) with NSCLC in Sweden : A SCAN-LEAF study analysis from the I-O Optimise initiative. *Annals of Oncology*. 2019;30(Suppl 2):III17; doi:10.1093/annonc/mdz070.005.
34. Greystoke A, Nawaz A, Ferguson S, Pabla M, Sanjeevi P, Bar-Ziv O. P09.23 Real-World Treatment Patterns and Outcomes in Patients with NSCLC in England (ROSANNE): A Retrospective Study. *Journal of Thoracic Oncology*. 2021;16:S299-S300; doi:10.1016/j.jtho.2021.01.451.
35. Jazieh AR, Onal HC, Tan DSW, Soo RA, Prabhash K, Kumar A, et al. Real-World Treatment Patterns and Clinical Outcomes in Patients With Stage III NSCLC: Results of KINDLE, a Multicountry Observational Study. *J Thorac Oncol*. 2021;16(10):1733-44; doi:10.1016/j.jtho.2021.05.003.
36. Kalilani L, Chao J, Hoge C, Stojadinovic A, Giove TJ, Sun X, et al. Recent Estimates of Survival in Patients with Advanced Non-Small Cell Lung Cancer (NSCLC) in the US (2010-2020). *The International Society for Pharmacoeconomics and Outcomes Research (ISPOR)*. 2022;25(Suppl 4); doi:10.1016/j.jval.2021.11.015.



37. Klarenbeek SE, Aarts MJ, van den Heuvel MM, Prokop M, Tummers M, Schuurbijs OCJ. Impact of time-to-treatment on survival for advanced non-small cell lung cancer patients in the Netherlands: a nationwide observational cohort study. *Thorax*. 2022;78(5):467-75; doi:10.1136/thoraxjnl-2021-218059.
38. Komiya T, Powell E, Vu C, Guddati AK. Role of T0 status in overall survival for unresectable stage III non-small cell lung cancer. *Journal of Clinical Oncology*. 2020;38(15\_suppl):9026-; doi:10.1200/JCO.2020.38.15\_suppl.9026.
39. Luciano S, Haudenschild C, Kuranz S. Using real world data to examine outcomes in immunotherapy-treated patients with metastatic non-small cell lung cancer. *Journal of Clinical Oncology*. 2020;38(15\_suppl):e21715-e; doi:10.1200/JCO.2020.38.15\_suppl.e21715.
40. Martin CM, Puello-Guerrero A, Mas-Lopez LA, Campos-Gomez S, Orlando-Orlandi FJ, Tejado Gallegos LF, et al. Real-world KINDLE-Latin America subset data on treatment patterns and clinical outcomes in patients with stage III non-small-cell lung cancer. *Cancer Med*. 2022;12(2):1247-59; doi:10.1002/cam4.4990.
41. Potter AL, Rosenstein AL, Kiang MV, Shah SA, Gaissert HA, Chang DC, et al. Association of computed tomography screening with lung cancer stage shift and survival in the United States: quasi-experimental study. *BMJ*. 2022;376:e069008; doi:10.1136/bmj-2021-069008.
42. Rittberg R, Bucher O, Xue L, Aurangzeb Z, Banerji SO, Dawe D. Population-based impacts of new therapies on outcomes for stage IV non-small cell lung cancer. *Journal of Clinical Oncology*. 2021;39(15\_suppl):9120-; doi:10.1200/JCO.2021.39.15\_suppl.9120.
43. Soares M, Antunes L, Redondo P, Borges M, Hermans R, Patel D, et al. Treatment and outcomes for early non-small-cell lung cancer: a retrospective analysis of a Portuguese hospital database. *Lung Cancer Manag*. 2021;10(2):LMT46; doi:10.2217/lmt-2020-0028.
44. Suipyte J, Schmidt S, Herrmann C, Mousavi M, Hitz F, Fruh M. Does progress achieved in the treatment of patients with metastatic non-small cell lung cancer (NSCLC) reach the elderly population? *Annals of Oncology*. 2019;30(Suppl 5):v650; doi:10.1093/annonc/mdz260.100.
45. Vachani A, Johnson B, Johnston S, Johnson W, Chandran U, Sengupta N, et al. ASSOCIATION OF STAGE AT DIAGNOSIS OF NON-SMALL CELL LUNG CANCER WITH OVERALL SURVIVAL AND ONE-YEAR HEALTHCARE EXPENDITURES: AN ANALYSIS OF THE SEER-MEDICARE DATABASE. *Chest*. 2021;160(4):A1608-A9; doi:10.1016/j.chest.2021.07.1468.
46. Van Dao T, Diep TB, Le Phuong T, Huggenberger R, Kumar A. Real-World Treatment Patterns and Clinical Outcomes in Patients With Stage III Non-Small-Cell Lung Cancer: Results of KINDLE-Vietnam Cohort. *Front Oncol*. 2022;12:842296; doi:10.3389/fonc.2022.842296.
47. Haas NB, Bhattacharya R, Song Y, Rogerio J, Zhang S, Carley C, et al. Variation in recurrence rate and overall survival (OS) outcomes by disease stage and incremental impact of time to recurrence on OS in localized renal cell carcinoma (RCC). *Journal of Clinical Oncology*. 2022;40(16\_suppl):4543-; doi:10.1200/JCO.2022.40.16\_suppl.4543.
48. Haas NB, Bhattacharya R, Ogbomo AS, Imai K, Gautam S, Rogerio J, et al. Disease-free and overall survival outcomes for localized RCC patients by disease stage. *Journal of Clinical Oncology*. 2022;40(16\_suppl):e16526-e; doi:10.1200/JCO.2022.40.16\_suppl.e16526.

49. Li X, Xu Z, Xu T, Qi F, Song N. Basic Characteristics and Survival Outcomes of Asian-American Patients with Clear Cell Renal Cell Carcinoma and Comparisons with White Patients: A Population-Based Analysis. *Int J Gen Med*. 2021;14:7869-83; doi:10.2147/IJGM.S340284.
50. Aly A, Shah R, Hill K, Botteman MF. Overall survival, costs and healthcare resource use by number of regimens received in elderly patients with newly diagnosed metastatic triple-negative breast cancer. *Future Oncol*. 2019;15(9):1007-20; doi:10.2217/fon-2018-0407.
51. Gogate A, Crosbie A, Le TK, Zhang Y, Das R, Davis C. Clinical characteristics, treatment patterns, and survival outcomes in women with early triple-negative (TN) or hormone receptor-positive/human epidermal growth factor receptor-2 negative (HR(+)/HER2-) breast cancer (BC) in the real-world (RW) setting. *Cancer Res*. 2022;82(4\_Supplement):P3-12-5; doi:10.1158/1538-7445.SABCS21-P3-12-15.
52. Lehrberg A, Davis MB, Baidoun F, Petersen L, Susick L, Jenkins B, et al. Outcome of African-American compared to White-American patients with early-stage breast cancer, stratified by phenotype. *Breast J*. 2021;27(7):573-80; doi:10.1111/tbj.14225.
53. Sieluk J, Haiderali A, Huang M, Yang L, Tryfonidis K, Hirshfield KM. SEER-Medicare study of early-stage triple-negative breast cancer: Real-world treatment patterns, survival, and expenditures 2010 to 2016. *Journal of Clinical Oncology*. 2020;38(15); doi:10.1200/JCO.2020.38.15\_suppl.e1251.
54. Yousefi Kashi AS, Yazdanfar S, Akbari M-E, Rakhsha A. Triple Negative Breast Cancer in Iranian Women: Clinical Profile and Survival Study. *International Journal of Cancer Management*. 2017;10(8):e10471; doi:10.5812/ijcm.10471.
55. Tjong MC, Doherty M, Tan H, Chan WC, Zhao H, Hallet J, et al. Analysis of Patient Reported Outcomes for Stage IV Non-Small Cell Lung Cancer Patients in Ontario. *International Journal of Radiation Oncology\*Biophysics\*Physics*. 2021;111(3, Supplement):e164-e5; doi:10.1016/j.ijrobp.2021.07.640.
56. Yu EY, Nekeman D, Billingham LJ, James ND, Cheng KK, Bryan RT, et al. Health-related quality of life around the time of diagnosis in patients with bladder cancer. *BJU Int*. 2019;124(6):984-91; doi:10.1111/bju.14804.
57. Aly A, Johnson C, Doleh Y, Shenolikar R, Hussain A, editors. Lifetime costs of urothelial carcinoma by stage at diagnosis. *Journal of Managed Care and Specialty Pharmacy*; 2019.
58. Buck PO, Saverno KR, Miller PJ, Arondekar B, Walker MS. Treatment Patterns and Health Resource Utilization Among Patients Diagnosed With Early Stage Resected Non-Small Cell Lung Cancer at US Community Oncology Practices. *Clin Lung Cancer*. 2015;16(6):486-95; doi:10.1016/j.clcc.2014.12.010.
59. Gildea TR, DaCosta Byfield S, Hogarth DK, Wilson DS, Quinn CC. A retrospective analysis of delays in the diagnosis of lung cancer and associated costs. *Clinicoecon Outcomes Res*. 2017;9:261-9; doi:10.2147/CEOR.S132259.
60. Haiderali A, Rhodes WC, Gautam S, Huang M, Sieluk J, Skinner KE, et al. Real-world treatment patterns and effectiveness outcomes in patients with early-stage triple-negative breast cancer. *Future Oncol*. 2021;17(29):3819-31; doi:10.2217/fon-2021-0530.

61. Jazieh AR, Onal HC, Tan DS-W, Soo RA, Prabhash K, Kumar A, et al. Contemporary management and associated outcomes of 3,151 patients with stage III non-small cell lung cancer (NSCLC) in a real-world setting: Results of KINDLE, a multicountry observational study. *Journal of Clinical Oncology*. 2020;38(15\_suppl):9043-; doi:10.1200/JCO.2020.38.15\_suppl.9043.
